# Supplementary material for: Global patterns and drivers of soil dissolved organic carbon concentrations
Source: Copernicus journal article supplement (doi:10.5194/essd-17-2873-2025), 2025-06-25
Supplement: Supplementary file 1 [file essd-17-2873-2025-supplement.pdf]

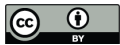

*Supplement of*

**Global patterns and drivers of soil dissolved organic carbon concentrations**

**Tianjing Ren and Andong Cai**

*Correspondence to:* Andong Cai ([caiandong@caas.cn](mailto:caiandong@caas.cn))

The copyright of individual parts of the supplement might differ from the article licence.

7 **Fig. S1** PRISMA flow diagram showing the procedure used for selection of studies for synthesis.

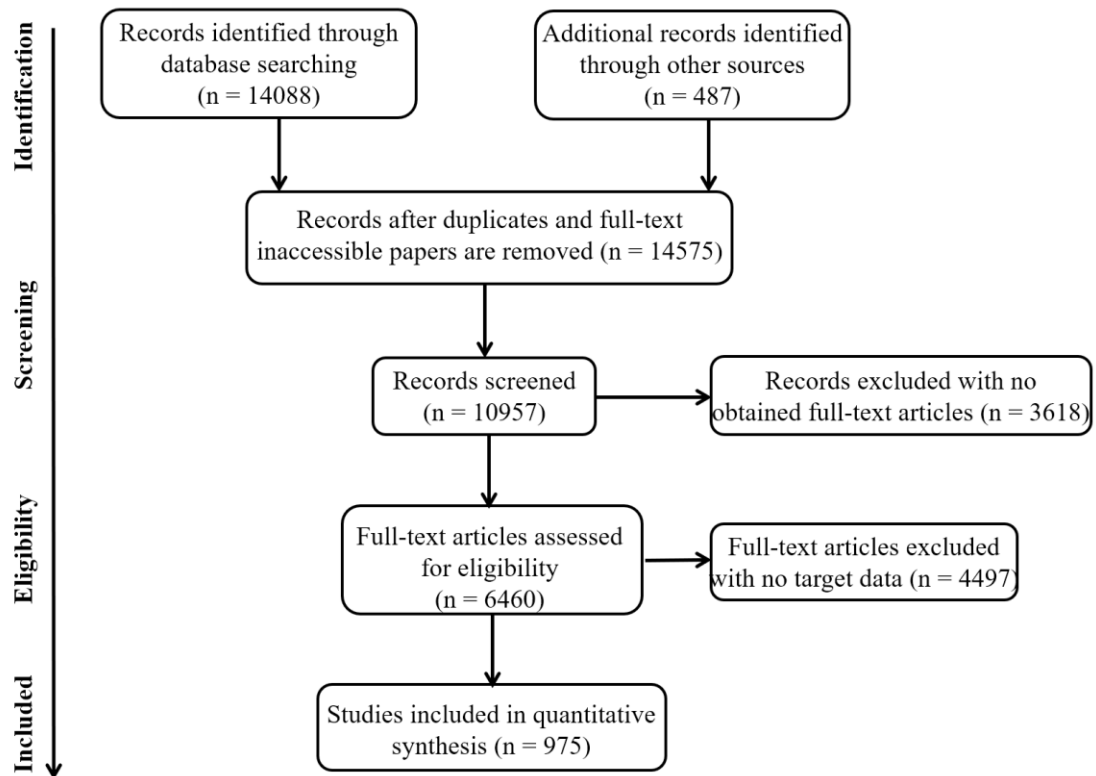

8

9

10 **Fig. S2 Validation of predictor values extracted from global maps.** (A) Mean annual temperature,  
 11 (B) mean annual precipitation, (C) elevation, (D) soil sand, (E) soil clay, (F) soil organic carbon (SOC),  
 12 (G) bulk density, (H) soil pH, and (I) microbial biomass carbon. Dashed line is the 1:1 line. Blue line  
 13 and shaded area indicate the regression line and 95% confidence interval, respectively.

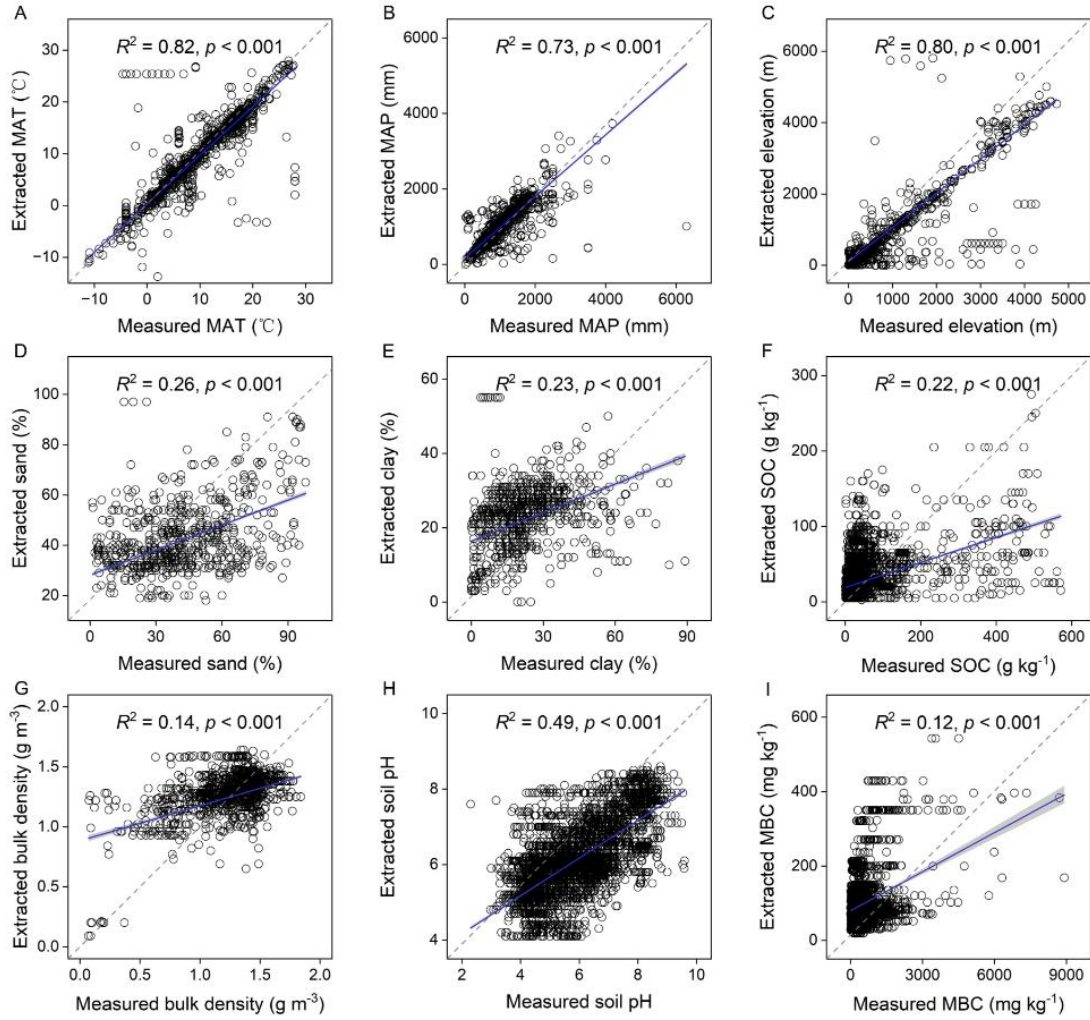

16 **Fig. S3 The autocorrelation between soil clay and silt content.**

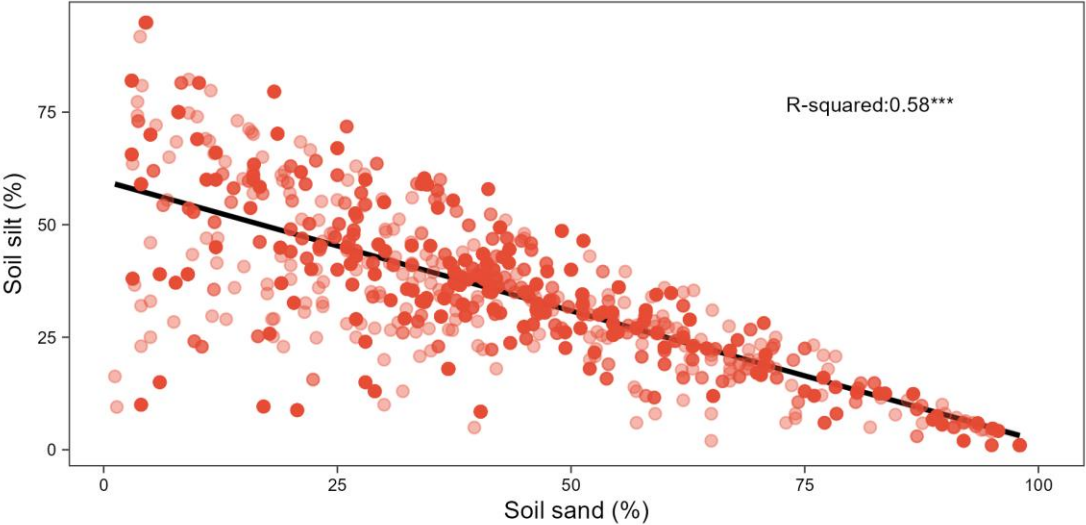

17

18

19 **Fig. S4** The relationship between soil dissolved organic carbon (DOC) concentration and predictors.  
 20 Soil DOC concentration in relation to mean annual temperature (MAT), mean annual precipitation  
 21 (MAP), elevation, soil sand content, soil clay content, soil depth, soil organic carbon (SOC) content,  
 22 soil pH, bulk density, and month (a, b, c, d, e, f, g, h, i, j, k, respectively). Binned soil DOC  
 23 concentration measures by 15 groups for predictors, except for month (12 groups). Red dots represent  
 24 the mean values. Solid red lines indicate results of local polynomial regressions based on the binned  
 25 mean values. For visualization, we chose to limit the y-axis to 1600 mg kg<sup>-1</sup>.

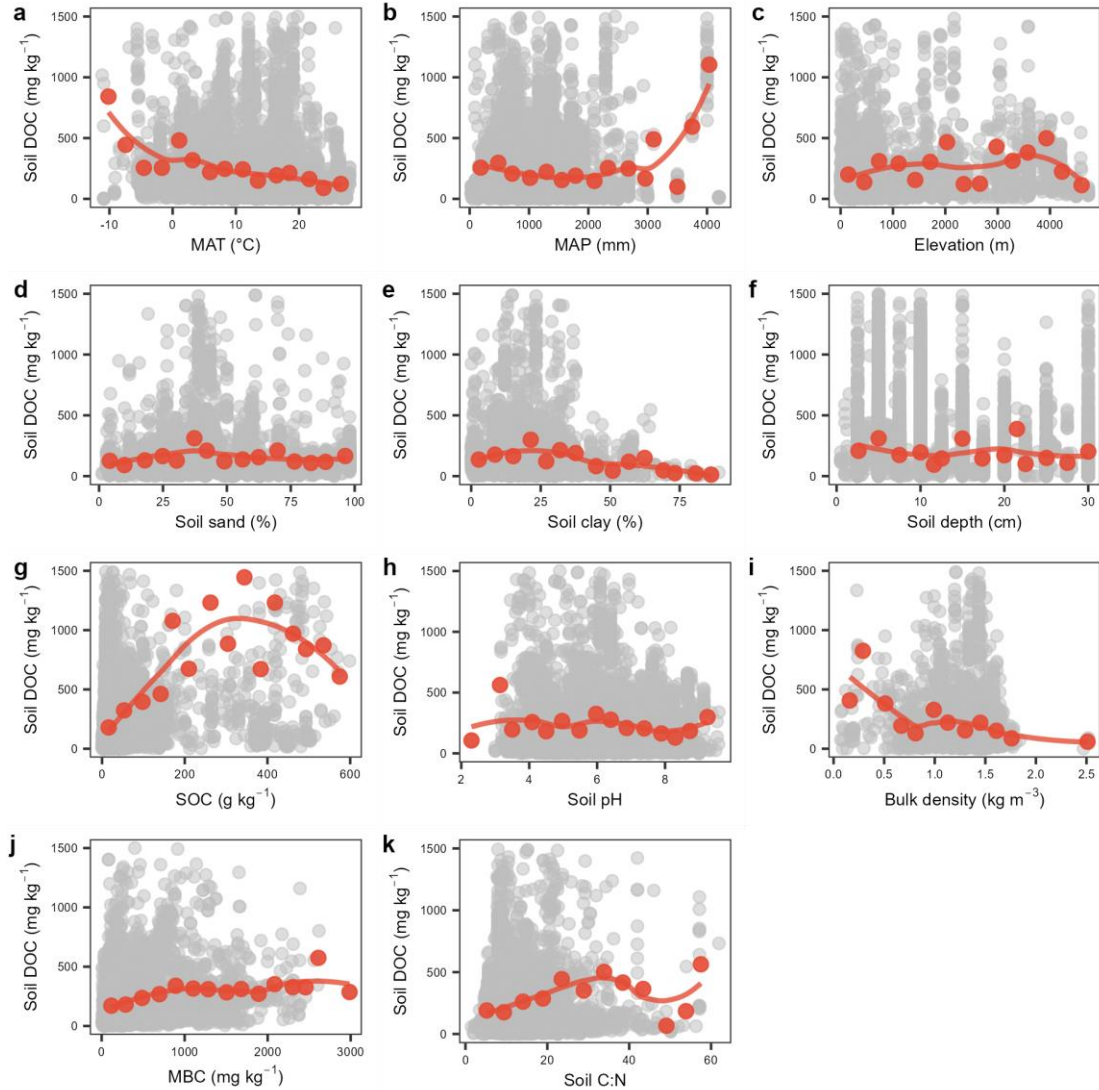

28     **Fig. S5 Workflow and model selection flowchart.**

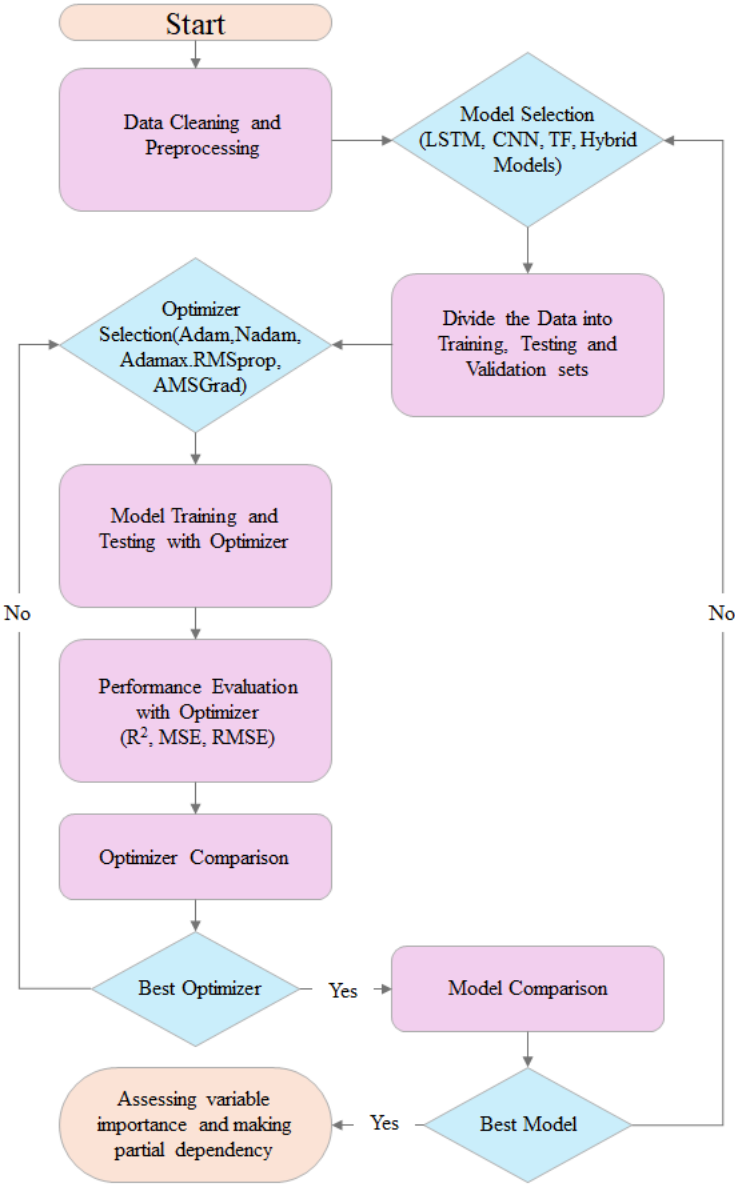

29

30

31 **Fig. S6 %IncMSE and IncNodePurity of the random forest model predicting soil dissolved**  
 32 **organic carbon (DOC) concentration, including the factor of ecosystems.**

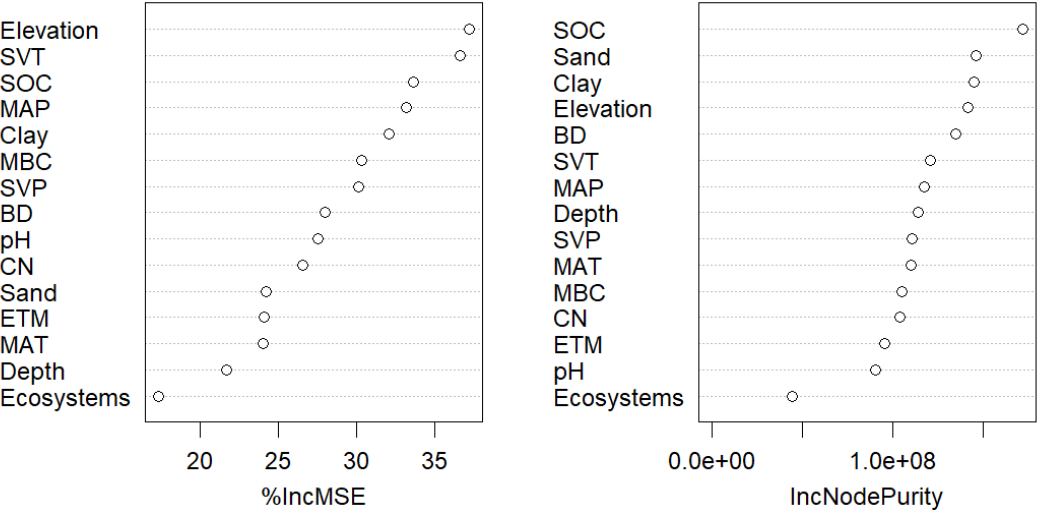

35 **Fig. S7 The validation (a) and test (b) of random forest models for soil dissolved organic carbon**  
36 **(DOC) under 10-fold cross-validation.**

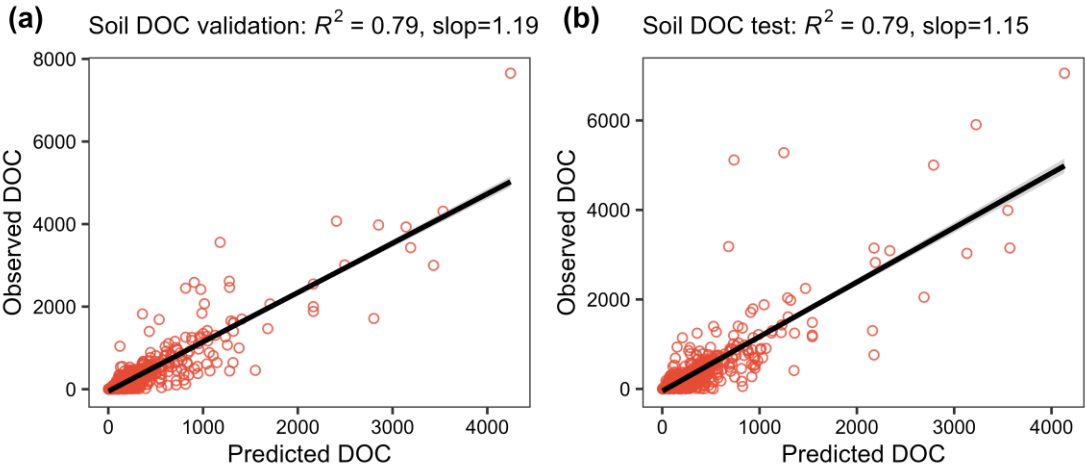

39 **Fig. S8 Residual Plot for the model train (a), validation (b), and test (c).**

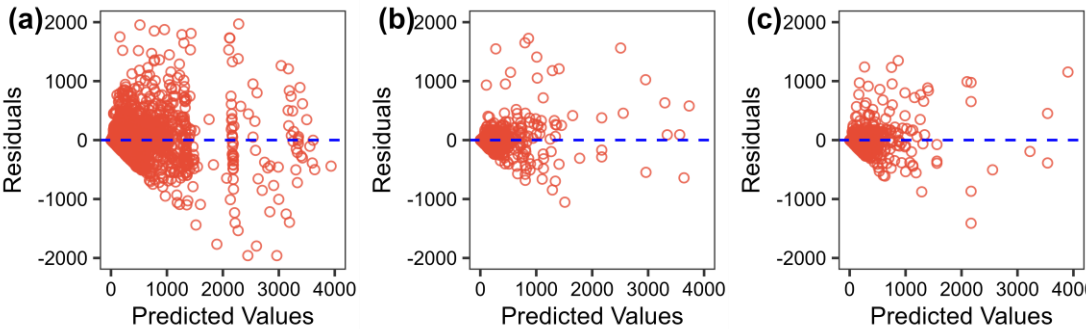

40  
41

42 **Fig. S9 Sensitivity analysis of model predictions.**

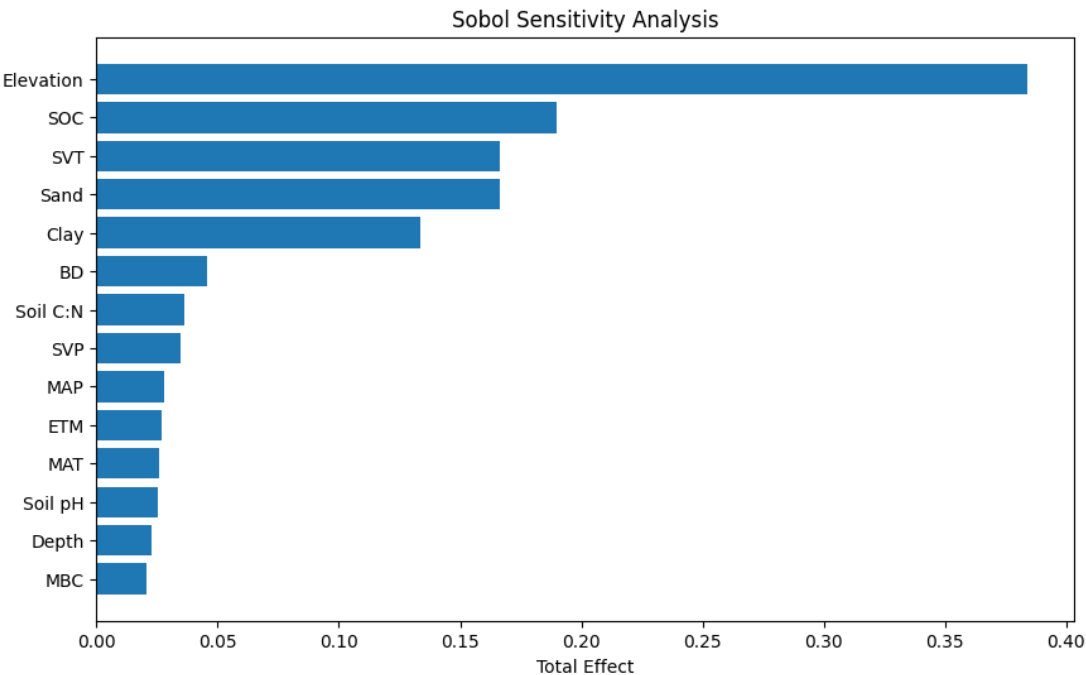

43

44

45 **Fig. S10 The 10-fold cross-validation of random forest models for soil dissolved organic carbon**  
 46 **(DOC) across wetland (a), forest (b), shrubland (c), tundra (d), grassland (e), and cropland (f)**  
 47 **ecosystems.**

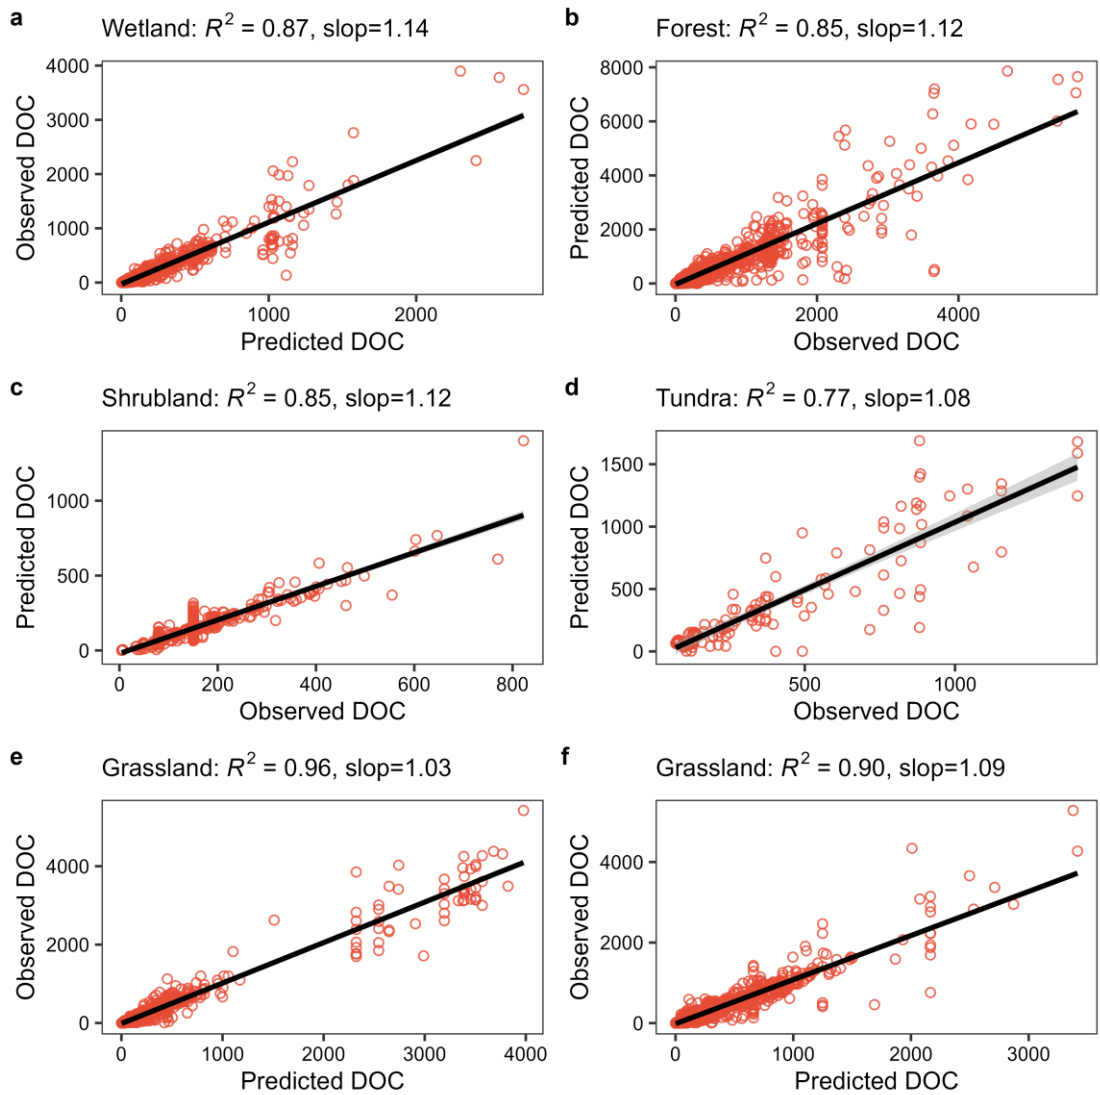

50 **Fig. S11 Standard deviation (SD) of predicted soil dissolved organic carbon concentration (mg**  
51 **kg<sup>-1</sup>).**

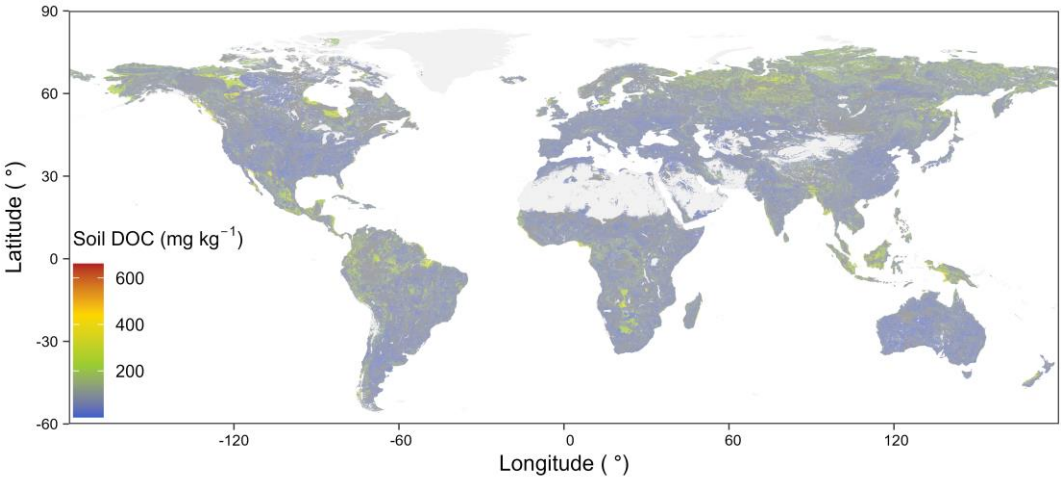

54 **Table S1.** Summary of independent variables used in this study to predict soil dissolved organic carbon  
55 concentration.

| Groups  | Variables                             | Original<br>resolution | Data source                                                                                             |
|---------|---------------------------------------|------------------------|---------------------------------------------------------------------------------------------------------|
| Climate | Mean annual temperature               | 1 km                   | <a href="http://worldclim.org/bioclim">http://worldclim.org/bioclim</a>                                 |
|         | Mean annual precipitation             | 1 km                   | <a href="http://worldclim.org/bioclim">http://worldclim.org/bioclim</a>                                 |
|         | Elevation                             | 1 km                   | <a href="http://worldclim.org/bioclim">http://worldclim.org/bioclim</a>                                 |
|         | Monthly evaporation                   | 1 km                   | <a href="http://worldclim.org/bioclim">http://worldclim.org/bioclim</a>                                 |
|         | Seasonal variability of precipitation | 1 km                   | <a href="http://worldclim.org/bioclim">http://worldclim.org/bioclim</a>                                 |
|         | Seasonal variability of temperature   | 1 km                   | <a href="http://worldclim.org/bioclim">http://worldclim.org/bioclim</a>                                 |
| Plants  | Ecosystem                             | 1 km                   | <a href="https://sedac.ciesin.columbia.edu">https://sedac.ciesin.columbia.edu</a>                       |
| Soil    | Soil organic carbon                   | 250 m                  | <a href="https://openlandmap.org">https://openlandmap.org</a>                                           |
|         | Soil total nitrogen                   | 250 m                  | <a href="https://openlandmap.org">https://openlandmap.org</a>                                           |
|         | Soil pH                               | 250 m                  | <a href="https://openlandmap.org">https://openlandmap.org</a>                                           |
|         | Sand                                  | 250 m                  | <a href="https://openlandmap.org">https://openlandmap.org</a>                                           |
|         | Cay                                   | 250 m                  | <a href="https://openlandmap.org">https://openlandmap.org</a>                                           |
|         | Bulk density                          | 250 m                  | <a href="https://openlandmap.org">https://openlandmap.org</a>                                           |
|         | Microbial biomass carbon              | 1 km                   | <a href="https://doi.org/10.6084/m9.figshare.19556419">https://doi.org/10.6084/m9.figshare.19556419</a> |

56

57

**Table S2.** Comparison of model performance for all applied predictive models. Using the assembled soil dissolved organic carbon concentration, seven models were applied (linear regression model, lasso regression model, elastic net model, bagged cart model, boosted regression trees model, cubist regression model, and random forest model). The  $R^2$  and root-mean-square error (RMSE) were calculated from 10-fold cross-validation to assess model performance.

| Model   | RMSE | $R^2$ | Regression | Model type         |
|---------|------|-------|------------|--------------------|
| LM      | 401  | 0.11  | Linear     | Non-selective      |
| LEAPS   | 411  | 0.10  | Linear     | Variable selective |
| ENET    | 411  | 0.10  | Linear     | Variable selective |
| BAGGED  | 327  | 0.41  | Non-linear | Machine learning   |
| BOOSTED | 304  | 0.49  | Non-linear | Machine learning   |
| CUBIST  | 258  | 0.60  | Non-linear | Machine learning   |
| RF      | 248  | 0.63  | Non-linear | Machine learning   |

## Supplementary Text Data source references

- 1 Wang, F. et al. Grazing greatly reduces the temporal stability of soil cellulolytic fungal community in a steppe on the Tibetan Plateau. *Journal of Environmental Sciences* 121, 48-57 (2022).
- 2 Wang, L. et al. Changes in litter input exert divergent effects on the soil microbial community and function in stands of different densities. *Science of the Total Environment* 845, 157297 (2022).
- 3 Wang, W. et al. Biocrust as a nature-based strategy (NbS) to restore the functionality of degraded soils in semiarid rainfed alfalfa (*Medicago sativa* L.) field. *Journal of Cleaner Production* 336, 130378 (2022).
- 4 Wang, Z. et al. Correlative distribution of DOM and heavy metals in the soils of the Zhangxi watershed in Ningbo city, East of China. *Environmental Pollution* 299, 118811 (2022).
- 5 Yang, J. et al. The effects of plastic film mulching and straw mulching on licorice root yield and soil organic carbon content in a dryland farming. *Science of The Total Environment* 826, 154113 (2022).
- 6 Yu, S. et al. Delayed wet season increases soil net N mineralization in a seasonally dry tropical forest. *Science of The Total Environment* 823, 153314 (2022).
- 7 Wu, D. et al. Molecular linkages between chemodiversity and MCPA complexation behavior of dissolved organic matter in paddy soil: Effects of land conversion. *Environmental Pollution* 311, 119949 (2022).
- 8 Zhang, D. et al. Dissimilar evolution of soil dissolved organic matter chemical properties during revegetation with arbor and shrub in desertified land of the Mu Us Desert. *Science of The Total Environment* 815, 152904 (2022).
- 9 Zhang, H. et al. Land-use-driven change in soil labile carbon affects microbial community composition and function. *Geoderma* 426, 116056 (2022).
- 10 Zhang, Y., Huang, X., Zhang, Z., Blewett, J. & Naafs, B. D. A. Spatiotemporal dynamics of dissolved organic carbon in a subtropical wetland and their implications for methane emissions. *Geoderma* 419, 115876 (2022).
- 11 Straathof, A. L., Chincarini, R., Comans, R. N. & Hoffland, E. Dynamics of soil dissolved organic carbon pools reveal both hydrophobic and hydrophilic compounds sustain microbial respiration. *Soil Biology and Biochemistry* 79, 109-116 (2014).
- 12 Ghani, A., Dexter, M., Carran, R. & Theobald, P. Dissolved organic nitrogen and carbon in pastoral soils: the New Zealand experience. *European Journal of Soil Science* 58, 832-843 (2007).
- 13 Curtin, D., Beare, M. H., Chantigny, M. H. & Greenfield, L. G. Controls on the extractability of soil organic matter in water over the 20 to 80 C temperature range. *Soil Science Society of America Journal* 75, 1423-1430 (2011).
- 14 Cook, B. D. & Allan, D. L. Dissolved organic carbon in old field soils: total amounts as a measure of available resources for soil mineralization. *Soil Biology and Biochemistry* 24, 585-594 (1992).
- 15 Neff, J. C. & Hooper, D. U. Vegetation and climate controls on potential CO<sub>2</sub>, DOC and DON production in northern latitude soils. *Global Change Biology* 8, 872-884 (2002).
- 16 Lundquist, E. J., Jackson, L. & Scow, K. Wet-dry cycles affect dissolved organic carbon in two California agricultural soils. *Soil Biology and Biochemistry* 31, 1031-1038 (1999).

109 17 Dou, F., Wright, A. L. & Hons, F. M. Sensitivity of labile soil organic carbon to tillage in wheat-  
110 based cropping systems. *Soil Science Society of America Journal* 72, 1445-1453 (2008).

111 18 Liu, Z., Clay, S. A., Clay, D. E. & Harper, S. S. Ammonia fertilizer influences atrazine  
112 adsorption-desorption characteristics. *Journal of Agricultural and Food Chemistry* 43, 815-819  
113 (1995).

114 19 Michaelson, G., Ping, C., Kling, G. & Hobbie, J. The character and bioactivity of dissolved  
115 organic matter at thaw and in the spring runoff waters of the arctic tundra north slope, Alaska.  
116 *Journal of Geophysical Research: Atmospheres* 103, 28939-28946 (1998).

117 20 Amador, J. A., Görres, J. H. & Savin, M. C. Carbon and nitrogen dynamics in *Lumbricus*  
118 *terrestris* (L.) burrow soil: relationship to plant residues and macropores. *Soil Science Society of*  
119 *America Journal* 67, 1755-1762 (2003).

120 21 Chang, C. H. et al. Effects of simulated warming on soil DOC and DON concentrations in the  
121 alpine forest of western Sichuan based on altitudinal gradient experiment. *Ying Yong Sheng tai*  
122 *xue bao= The Journal of Applied Ecology* 27, 663-671 (2016).

123 22 Lan, J. et al. Dissolution rate under soil in karst areas and the influencing factors of different  
124 land use patterns. *Acta Ecologica Sinica* 33, 3205-3212 (2013).

125 23 Zhong, X.-l. et al. Physical protection by soil aggregates stabilizes soil organic carbon under  
126 simulated N deposition in a subtropical forest of China. *Geoderma* 285, 323-332 (2017).

127 24 Liu, D., Song, C., Wang, L., Wang, L. & Li, Y. Exogenous nitrogen enrichment impact on the  
128 carbon mineralization and DOC of the freshwater marsh soil. *Huan Jing ke Xue= Huanjing*  
129 *Kexue* 29, 3525-3530 (2008).

130 25 WANG, Q.-k., WANG, S.-l., YU, X.-j., ZHANG, J. & LIU, Y.-x. Soil carbon mineralization  
131 potential and its effect on soil active organic carbon in evergreen broadleaved forest and Chinese  
132 fir plantation. *Chinese Journal of Ecology* 26, 1918 (2007).

133 26 Qi, Y.-C. et al. Responses of soil total organic carbon and dissolved organic carbon to simulated  
134 nitrogen deposition in temperate typical steppe in Inner Mongolia, China. *Huan Jing ke Xue=*  
135 *Huanjing Kexue* 35, 3073-3082 (2014).

136 27 Wu, H. et al. Accumulation of nitrate and dissolved organic nitrogen at depth in a red soil  
137 Critical Zone. *Geoderma* 337, 1175-1185 (2019).

138 28 Xi, M. et al. Assessment of the content, structure, and source of soil dissolved organic matter in  
139 the coastal wetlands of Jiaozhou Bay, China. *Physics and Chemistry of the Earth, Parts A/b/c*  
140 103, 35-44 (2018).

141 29 Xiao-yan, Y. et al. Effects of extraction conditions on topsoil dissolved organic carbon  
142 concentration of black soil. *Journal of Beijing Forestry University* 35, 68-72 (2013).

143 30 Zhou, Z. et al. Changes in soil physicochemical properties and bacterial communities among  
144 different soil depths after long-term straw mulching under a no-till system. *SOIL Discussions*  
145 2021, 1-33 (2021).

146 31 Zhang, J. et al. Different responses of soil respiration and its components to nitrogen and  
147 phosphorus addition in a subtropical secondary forest. *Forest Ecosystems* 8, 1-13 (2021).

148 32 Sun, X. et al. Organic mulching promotes soil organic carbon accumulation to deep soil layer in  
149 an urban plantation forest. *Forest Ecosystems* 8, 1-11 (2021).

150 33 Li, W.-y., Guo, Z., Li, J. & Han, J.-c. Effects of different proportions of soft rock additions on  
151 organic carbon pool and bacterial community structure of sandy soil. *Scientific Reports* 11, 4624  
152 (2021).

153 34 Ghosh, M. et al. Short-term carbon sequestration and changes of soil organic carbon pools in  
154 rice under integrated nutrient management in India. *Agriculture* 11, 348 (2021).

155 35 Che, Q., Li, M. & Zhang, Z. Effects of biochar application on soil organic carbon in degraded  
156 saline-sodic wetlands of Songnen Plain, Northeast China. *Chinese Geographical Science* 31,  
157 877-887 (2021).

158 36 Anning, D. K. et al. Divergent Accumulation of Microbial Residues and Amino Sugars in Loess  
159 Soil after Six Years of Different Inorganic Nitrogen Enrichment Scenarios. *Applied Sciences* 11,  
160 5788 (2021).

161 37 Zhang, L. et al. Soil labile organic carbon fractions and soil enzyme activities after 10 years of  
162 continuous fertilization and wheat residue incorporation. *Scientific Reports* 10, 11318 (2020).

163 38 Walkiewicz, A., Brzezińska, M., Bieganski, A., Sas-Paszt, L. & Frac, M. Early response of  
164 soil microbial biomass and activity to biofertilizer application in degraded brunic arenosol and  
165 abruptic luvisol of contrasting textures. *Agronomy* 10, 1347 (2020).

166 39 Li, P. et al. Effects of straw and its biochar applications on the abundance and community  
167 structure of CO<sub>2</sub>-fixing bacteria in a sandy agricultural soil. *Journal of soils and sediments* 20,  
168 2225-2235 (2020).

169 40 Han, Y. et al. Effects of straw-return method for the maize–rice rotation system on soil  
170 properties and crop yields. *Agronomy* 10, 461 (2020).

171 41 Fan, W. & Wu, J. Short-term effects of returning granulated straw on soil microbial community  
172 and organic carbon fractions in dryland farming. *Journal of Microbiology* 58, 657-667 (2020).

173 42 Fan, D. et al. Nitrogen deep placement mitigates methane emissions by regulating methanogens  
174 and methanotrophs in no-tillage paddy fields. *Biology and fertility of soils* 56, 711-727 (2020).

175 43 Abd El-Azeim, M., Sherif, M., Hussien, M. & Haddad, S. Temporal impacts of different  
176 fertilization systems on soil health under arid conditions of potato monocropping. *Journal of*  
177 *Soil Science and Plant Nutrition* 20, 322-334 (2020).

178 44 Zhou, Z. et al. Long-term straw mulch effects on crop yields and soil organic carbon fractions at  
179 different depths under a no-till system on the Chengdu Plain, China. *Journal of soils and*  
180 *sediments* 19, 2143-2152 (2019).

181 45 Yang, S., Sun, X., Ding, J., Jiang, Z. & Xu, J. Effects of biochar addition on the NEE and soil  
182 organic carbon content of paddy fields under water-saving irrigation. *Environmental Science*  
183 *and Pollution Research* 26, 8303-8311 (2019).

184 46 Karimi, A., Moezzi, A., Chorom, M. & Enayatzamir, N. Chemical fractions and availability of  
185 Zn in a calcareous soil in response to biochar amendments. *Journal of Soil Science and Plant*  
186 *Nutrition* 19, 851-864 (2019).

187 47 Irfan, M. et al. Response of soil microbial biomass and enzymatic activity to biochar  
188 amendment in the organic carbon deficient arid soil: a 2-year field study. *Arabian Journal of*  
189 *Geosciences* 12, 1-9 (2019).

190 48 Azeem, M. et al. Effects of biochar and NPK on soil microbial biomass and enzyme activity  
191 during 2 years of application in the arid region. *Arabian Journal of Geosciences* 12, 1-13 (2019).

192 49 Yang, X. et al. Labile organic carbon fractions and carbon pool management index in a 3-year  
193 field study with biochar amendment. *Journal of soils and sediments* 18, 1569-1578 (2018).

194 50 Li, J. et al. Response of soil organic carbon fractions, microbial community composition and  
195 carbon mineralization to high-input fertilizer practices under an intensive agricultural system.  
196 *PLoS One* 13, e0195144 (2018).

197 51 Chen, Z., Wang, Q., Wang, H., Bao, L. & Zhou, J. Crop yields and soil organic carbon fractions  
198 as influenced by straw incorporation in a rice–wheat cropping system in southeastern China.  
199 Nutrient Cycling in Agroecosystems 112, 61-73 (2018).

200 52 Páraga-Aguado, I., Alcoba-Gómez, P. & Conesa, H. M. Suitability of a municipal solid waste as  
201 organic amendment for agricultural and metal (loid)-contaminated soils: effects on soil  
202 properties, plant growth and metal (loid) allocation in *Zea mays* L. Journal of Soils and  
203 Sediments 17, 2469-2480 (2017).

204 53 Liu, M. et al. Improved nutrient status affects soil microbial biomass, respiration, and functional  
205 diversity in a Lei bamboo plantation under intensive management. Journal of Soils and  
206 Sediments 17, 917-926 (2017).

207 54 Liu, H. et al. Responses of soil methanogens, methanotrophs, and methane fluxes to land-use  
208 conversion and fertilization in a hilly red soil region of southern China. Environmental Science  
209 and Pollution Research 24, 8731-8743 (2017).

210 55 Gebhardt, M., Fehmi, J. S., Rasmussen, C. & Gallery, R. E. Soil amendments alter plant  
211 biomass and soil microbial activity in a semi-desert grassland. Plant and soil 419, 53-70 (2017).

212 56 Zou, H. et al. Effects of straw return in deep soils with urea addition on the soil organic carbon  
213 fractions in a semi-arid temperate cornfield. PloS one 11, e0153214 (2016).

214 57 Zhang, L. et al. Changes in soil carbon and enzyme activity as a result of different long-term  
215 fertilization regimes in a greenhouse field. PloS one 10, e0118371 (2015).

216 58 Wang, Y. et al. 23-year manure and fertilizer application increases soil organic carbon  
217 sequestration of a rice–barley cropping system. Biology and Fertility of Soils 51, 583-591  
218 (2015).

219 59 An, T. et al. Dynamics and distribution of <sup>13</sup>C-labeled straw carbon by microorganisms as  
220 affected by soil fertility levels in the Black Soil region of Northeast China. Biology and Fertility  
221 of Soils 51, 605-613 (2015).

222 60 Zhu, L., Hu, N., Yang, M., Zhan, X. & Zhang, Z. Effects of different tillage and straw return on  
223 soil organic carbon in a rice-wheat rotation system. PLOS one 9, e88900 (2014).

224 61 Tian, J., Lu, S., Fan, M., Li, X. & Kuzyakov, Y. Integrated management systems and N  
225 fertilization: effect on soil organic matter in rice-rapeseed rotation. Plant and soil 372, 53-63  
226 (2013).

227 62 Liu, B. et al. 14 year applications of chemical fertilizers and crop straw effects on soil labile  
228 organic carbon fractions, enzyme activities and microbial community in rice-wheat rotation of  
229 middle China. Science of the Total Environment 841, 156608 (2022).

230 63 Liu, E., Yan, C., Mei, X., Zhang, Y. & Fan, T. Long-term effect of manure and fertilizer on soil  
231 organic carbon pools in dryland farming in northwest China. Plos one 8, e56536 (2013).

232 64 Lin, S. et al. Nitrous oxide emissions from yellow brown soil as affected by incorporation of  
233 crop residues with different carbon-to-nitrogen ratios: a case study in central China. Archives of  
234 environmental contamination and toxicology 65, 183-192 (2013).

235 65 Liang, Q. et al. Effects of 15 years of manure and inorganic fertilizers on soil organic carbon  
236 fractions in a wheat-maize system in the North China Plain. Nutrient Cycling in Agroecosystems  
237 92, 21-33 (2012).

238 66 Zhu, H., Gong, L., Ding, Z. & Li, Y. Effects of litter and root manipulations on soil carbon and  
239 nitrogen in a Schrenk's spruce (*Picea schrenkiana*) forest. PLoS One 16, e0247725 (2021).

240 67 Xiao, Q. et al. Long-term manuring increases microbial carbon use efficiency and mitigates

241 priming effect via alleviated soil acidification and resource limitation. *Biology and Fertility of*  
242 *Soils* 57, 925-934 (2021).

243 68 Wang, D. et al. Nitrogen fertilization overweighs intercropping in promotion of dissolved  
244 organic carbon concentration and complexity in potato-cropped soil. *Plant and Soil* 462,  
245 273-284 (2021).

246 69 Chen, Q. et al. Quantitative and Qualitative Responses of Soil Water-Extractable Organic Matter  
247 to Carbon and Nitrogen Management Practices in Loess Soil. *Agronomy* 11, 2025 (2021).

248 70 Bizimana, F. et al. Effects of long-term nitrogen fertilization on N<sub>2</sub>O, N<sub>2</sub> and their  
249 yield-scaled emissions in a temperate semi-arid agro-ecosystem. *Journal of Soils and Sediments*  
250 21, 1659-1671 (2021).

251 71 Tang, H. et al. Short-term responses of soil organic carbon and its labile fractions to different  
252 manure Nitrogen input in a double-cropping rice field. *The Journal of Agricultural Science* 158,  
253 119-127 (2020).

254 72 Song, D. et al. Effects of straw mulching practices on soil nematode communities under walnut  
255 plantation. *Scientific Reports* 10, 15351 (2020).

256 73 Liu, X., Feng, Z., Zhou, Y., Zhu, H. & Yao, Q. Plant Species-Dependent Effects of Liming and  
257 Plant Residue Incorporation on Soil Bacterial Community and Activity in an Acidic Orchard  
258 Soil. *Applied Sciences* 10, 5681 (2020).

259 74 Liu, J. et al. Variation of soil dissolved organic carbon under long-term different fertilizations  
260 and its correlation with maize yields. *Journal of Soils and Sediments* 20, 2761-2770 (2020).

261 75 Li, Z. et al. Green manure incorporation with reductions in chemical fertilizer inputs improves  
262 rice yield and soil organic matter accumulation. *Journal of Soils and Sediments* 20, 2784-2793  
263 (2020).

264 76 Bah, H., Ren, X., Wang, Y., Tang, J. & Zhu, B. Characterizing greenhouse gas emissions and  
265 global warming potential of wheat-maize cropping systems in response to organic amendments  
266 in eutric regosols, China. *Atmosphere* 11, 614 (2020).

267 77 Mohamed, W. S. & Hammam, A. A. Poultry manure-derived biochar as a soil amendment and  
268 fertilizer for sandy soils under arid conditions. *Egyptian Journal of Soil Science* 59, 1-14 (2019).

269 78 Liu, Y. et al. Effects of water and organic manure coupling on the immobilization of cadmium  
270 by sepiolite. *Journal of soils and sediments* 19, 798-808 (2019).

271 79 Kim, S. U. et al. Nitrous oxide emission from upland soil amended with different animal  
272 manures. *Applied biological chemistry* 62, 1-8 (2019).

273 80 Chen, T. et al. Seasonal variations in N<sub>2</sub> and N<sub>2</sub>O emissions from a wheat–maize cropping  
274 system. *Biology and fertility of soils* 55, 539-551 (2019).

275 81 Peng, C., Hong-Yan, W., Zheng, R.-L., Zhang, B. & Guo-Xin, S. Long-term effects of biochar  
276 on rice production and stabilisation of cadmium and arsenic levels in contaminated paddy soils.  
277 *Earth and Environmental Science Transactions of The Royal Society of Edinburgh* 109, 415-420  
278 (2018).

279 82 Xu, P. et al. Structure and biodegradability of dissolved organic matter from Ultisol treated with  
280 long-term fertilizations. *Journal of soils and sediments* 18, 1865-1872 (2018).

281 83 Xiao, Y. et al. Effect of biochar amendment on methane emissions from paddy field under  
282 water-saving irrigation. *Sustainability* 10, 1371 (2018).

283 84 Liu, Z., Nan, Z., Zhao, C. & Yang, Y. Potato absorption and phytoavailability of Cd, Ni, Cu, Zn  
284 and Pb in sierozem soils amended with municipal sludge compost. *Journal of Arid Land* 10,

638-652 (2018).

85 Conti, L. D. et al. Aluminum species and activity in sandy soil solution with pig slurry addition. *Pesquisa Agropecuária Brasileira* 52, 914-922 (2017).

86 Chen, A. et al. Rapid decrease of soil carbon after abandonment of subtropical paddy fields. *Plant and Soil* 415, 203-214 (2017).

87 Antonangelo, J. A., Ferrari, J., Crusciol, C. A. C. & Alleoni, L. R. F. Lime and calcium-magnesium silicate in the ionic speciation of an Oxisol. *Scientia Agricola* 74, 317-333 (2017).

88 Zhao, B., Zhang, J., Yu, Y., Karlen, D. L. & Hao, X. Crop residue management and fertilization effects on soil organic matter and associated biological properties. *Environmental Science and Pollution Research* 23, 17581-17591 (2016).

89 Wang, X.-g., Li, C.-s., Luo, Y., Hua, K.-k. & Zhou, M.-h. The impact of nitrogen amendment and crop growth on dissolved organic carbon in soil solution. *Journal of Mountain Science* 13, 95-103 (2016).

90 Wang, X., Tang, C., Baldock, J., Butterly, C. & Gazey, C. Long-term effect of lime application on the chemical composition of soil organic carbon in acid soils varying in texture and liming history. *Biology and Fertility of Soils* 52, 295-306 (2016).

91 Strid, A., Lee, B. S. & Lajtha, K. Homogenization of detrital leachate in an old-growth coniferous forest, OR: DOC fluorescence signatures in soils undergoing long-term litter manipulations. *Plant and Soil* 408, 133-148 (2016).

92 Sánchez-García, M. et al. Compost vs biochar amendment: a two-year field study evaluating soil C build-up and N dynamics in an organically managed olive crop. *Plant and Soil* 408, 1-14 (2016).

93 Liu, H. et al. Effects of land use conversion and fertilization on CH<sub>4</sub> and N<sub>2</sub>O fluxes from typical hilly red soil. *Environmental Science and Pollution Research* 23, 20269-20280 (2016).

94 Liu, C. et al. Biochar increased water holding capacity but accelerated organic carbon leaching from a sloping farmland soil in China. *Environmental Science and Pollution Research* 23, 995-1006 (2016).

95 Gu, C. et al. Dynamic changes of soil surface organic carbon under different mulching practices in citrus orchards on sloping land. *PloS one* 11, e0168384 (2016).

96 Shang, F., Ren, S., Yang, P., Li, C. & Ma, N. Effects of different fertilizer and irrigation water types, and dissolved organic matter on soil C and N mineralization in crop rotation farmland. *Water, Air, & Soil Pollution* 226, 1-25 (2015).

97 Xie, B. et al. N<sub>2</sub>O emissions from an apple orchard in the coastal area of Bohai Bay, China. *The Scientific World Journal* 2014, 164732 (2014).

98 Kim, S. Y., Pramanik, P., Bodelier, P. L. & Kim, P. J. Cattle manure enhances methanogens diversity and methane emissions compared to swine manure under rice paddy. *PLoS One* 9, e113593 (2014).

99 Blair, R. M., Savin, M. C. & Chen, P. Composted and formulated poultry litters promote soil nutrient availability but not plant uptake or edamame quality. *Agronomy for sustainable development* 34, 849-856 (2014).

100 Bajgai, Y., Kristiansen, P., Hulugalle, N. & McHenry, M. Changes in soil carbon fractions due to incorporating corn residues in organic and conventional vegetable farming systems. *Soil research* 52, 244-252 (2014).

329 101 Lee, C. H. et al. Different response of silicate fertilizer having electron acceptors on methane  
330 emission in rice paddy soil under green manuring. *Biology and Fertility of Soils* 48, 435-442  
331 (2012).

332 102 Zambrosi, F. C. B., Alleoni, L. R. F. & Caires, E. F. Liming and ionic speciation of an Oxisol  
333 under no-till system. *Scientia Agricola* 65, 190-203 (2008).

334 103 Kalbitz, K., Meyer, A., Yang, R. & Gerstberger, P. Response of dissolved organic matter in the  
335 forest floor to long-term manipulation of litter and throughfall inputs. *Biogeochemistry* 86,  
336 301-318 (2007).

337 104 Shand, C. & Coutts, G. The effects of sheep faeces on soil solution composition. *Plant and Soil*  
338 285, 135-148 (2006).

339 105 Yano, Y., Lajtha, K., Sollins, P. & Caldwell, B. A. Chemistry and dynamics of dissolved organic  
340 matter in a temperate coniferous forest on andic soils: effects of litter quality. *Ecosystems* 8,  
341 286-300 (2005).

342 106 Lajtha, K. et al. Detrital controls on soil solution N and dissolved organic matter in soils: a field  
343 experiment. *Biogeochemistry* 76, 261-281 (2005).

344 107 Park, J.-H. & Matzner, E. Controls on the release of dissolved organic carbon and nitrogen from  
345 a deciduous forest floor investigated by manipulations of aboveground litter inputs and water  
346 flux. *Biogeochemistry* 66, 265-286 (2003).

347 108 Yavitt, J. B. & Fahey, T. J. Peat and solution chemistry responses to CaCO<sub>3</sub> application in  
348 wetlands next to Woods Lake, New York. *Experimental Watershed Liming Study*, 103-121  
349 (1996).

350 109 Geary, R. J. & Driscoll, C. T. Forest soil solutions: acid/base chemistry and response to calcite  
351 treatment. *Experimental Watershed Liming Study*, 53-78 (1996).

352 110 Smolander, A., Kitunen, V., Priha, O. & Mäkkönen, E. Nitrogen transformations in limed and  
353 nitrogen fertilized soil in Norway spruce stands. *Plant and Soil* 172, 107-115 (1995).

354 111 Kreuzer, K. in *Nutrient Uptake and Cycling in Forest Ecosystems: Proceedings of the*  
355 *CEC/IUFRO Symposium Nutrient Uptake and Cycling in Forest Ecosystems Halmstad, Sweden,*  
356 *June, 7–10, 1993.* 447-470 (Springer).

357 112 ULLAH, B. Soil Nitrous Oxide Emission as Affected by Application of Phosphorus, 华中农业  
358 大学, (2016).

359 113 Hung, C.-Y., Ejack, L. & Whalen, J. K. Fall-applied manure with cover crop did not increase  
360 nitrous oxide emissions during spring freeze-thaw periods. *Applied Soil Ecology* 158, 103786  
361 (2021).

362 114 Munera-Echeverri, J. L., Martinsen, V., Strand, L. T., Cornelissen, G. & Mulder, J. Effect of  
363 conservation farming and biochar addition on soil organic carbon quality, nitrogen  
364 mineralization, and crop productivity in a light textured Acrisol in the sub-humid tropics. *PloS*  
365 *one* 15, e0228717 (2020).

366 115 Akley, K. E. Impacts of cropping systems on soil health and microbial ecology, Kansas State  
367 University, (2015).

368 116 Omari, R. A. et al. Influence of organic inputs with mineral fertilizer on maize yield and soil  
369 microbial biomass dynamics in different seasons in a tropical acrisol. *Environmental*  
370 *Sustainability* 3, 45-57 (2020).

371 117 Ansong Omari, R. et al. Nitrogen mineralization and microbial biomass dynamics in different  
372 tropical soils amended with contrasting organic resources. *Soil Systems* 2, 63 (2018).

373 118 Zhang, Y. et al. Long-Term Fertilization Alters the Chemical Composition of Dissolved Organic  
374 Carbon via Regulating Soil Physicochemical Factors. (2021).

375 119 Ohno, T., Griffin, T. S., Liebman, M. & Porter, G. A. Chemical characterization of soil  
376 phosphorus and organic matter in different cropping systems in Maine, USA. *Agriculture,*  
377 *ecosystems & environment* 105, 625-634 (2005).

378 120 Gao, J., Liu, L., Shi, Z. & Lv, J. Characteristics of Fluorescent Dissolved Organic Matter in  
379 Paddy Soil Amended With Crop Residues After Column (0–40 cm) Leaching. *Frontiers in*  
380 *Environmental Science* 10, 766795 (2022).

381 121 Zheng, H. et al. Field-aged biochar enhances soil organic carbon by increasing recalcitrant  
382 organic carbon fractions and making microbial communities more conducive to carbon  
383 sequestration. *Agriculture, Ecosystems & Environment* 340, 108177 (2022).

384 122 Sun, X., Liu, J., Liu, S. & Gao, W. Soil organic carbon fractions comparison after 40-year  
385 long-term fertilisation in a wheat-corn rotation field. *Soil & Water Research* 17 (2022).

386 123 Xu, Y. et al. Dissolved N and C leaching losses mitigated by optimized fertilization management  
387 in intensive greenhouse system: insights from DOM characteristics via EEM-PARAFAC.  
388 *Journal of Soils and Sediments* 23, 657-671 (2023).

389 124 Ma, F. et al. Impacts of elevated atmospheric CO<sub>2</sub> and N fertilization on N<sub>2</sub>O emissions and  
390 dynamics of associated soil labile C components and mineral N in a maize field in the North  
391 China plain. *Agronomy* 12, 432 (2022).

392 125 Zhang, Z. et al. Cover crops and N fertilization affect soil ammonia volatilization and N<sub>2</sub>O  
393 emission by regulating the soil labile carbon and nitrogen fractions. *Agriculture, Ecosystems &*  
394 *Environment* 340, 108188 (2022).

395 126 Wang, X., Jian, S., Gamage, L. & Li, J. Effect of nitrogen fertilization on central tendency and  
396 spatial heterogeneity of soil moisture, pH and dissolved organic carbon and nitrogen in two  
397 bioenergy croplands#. *Journal of Plant Nutrition and Soil Science* 185, 355-369 (2022).

398 127 Wang, D. et al. Compost amendment maintains soil structure and carbon storage by increasing  
399 available carbon and microbial biomass in agricultural soil—A six-year field study. *Geoderma*  
400 427, 116117 (2022).

401 128 Chen, K. et al. Biochar-induced changes in the soil diazotroph community abundance and  
402 structure in a peanut field trial. *Biochar* 4, 26 (2022).

403 129 Wang, C., Du, S. & Nishimura, O. Rice rusk-derived biochar suppressed N<sub>2</sub>O emission from  
404 acidic arable soil by inhibiting nitrate reduction. *Journal of Soil Science and Plant Nutrition* 22,  
405 3189-3199 (2022).

406 130 Xu, P. et al. Prior nitrogen fertilization stimulated N<sub>2</sub>O emission from rice cultivation season  
407 under a rapeseed-rice production system. *Plant and Soil*, 1-12 (2022).

408 131 Yang, Y., Liu, H. & Lv, J. Response of N<sub>2</sub>O emission and denitrification genes to different  
409 inorganic and organic amendments. *Scientific Reports* 12, 3940 (2022).

410 132 Fan, D., Cao, C. & Li, C. Integrated organic-inorganic nitrogen fertilization mitigates nitrous  
411 oxide emissions by regulating ammonia-oxidizing bacteria in purple caitai fields. *Agriculture* 12,  
412 723 (2022).

413 133 Maslov, M., Astaykina, A. & Pozdnyakov, L. Earthworm *Lumbricus terrestris* contributes  
414 nitrous oxide emission from temperate agricultural soil regardless of applied mineral nitrogen  
415 fertilizer doses. *Agronomy* 12, 2745 (2022).

416 134 Xu, Y. et al. Long-term successive biochar amendments Alter the composition and  $\alpha$ -diversity of

417 bacterial Community of Paddy Soil in Rice-wheat rotation. *Frontiers in Environmental Science*  
418 10, 921766 (2022).

419 135 Huang, R. et al. Biochar Application Increases Labile Carbon and Inorganic Nitrogen Supply in  
420 a Continuous Monocropping Soil. *Land* 11, 473 (2022).

421 136 Lin, H. et al. How do soil organic carbon pool, stock and their stability respond to crop residue  
422 incorporation in subtropical calcareous agricultural soils? *Agriculture, Ecosystems &*  
423 *Environment* 332, 107927 (2022).

424 137 Gu, Y.-J., Han, C.-L., Kong, M., Siddique, K. H. & Li, F.-M. Film Mulching with Low  
425 Phosphorus Application Improves Soil Organic Carbon and Its Decomposability in a Semiarid  
426 Agroecosystem. *Agriculture* 12, 816 (2022).

427 138 Al-Graiti, T. et al. The composition of dissolved organic matter in arable lands: does soil  
428 management practice matter? *Agronomy* 12, 2797 (2022).

429 139 Xu, P. et al. Methane emission from rice cultivation regulated by soil hydrothermal condition  
430 and available carbon and nitrogen under a rice–wheat rotation system. *Plant and Soil* 480,  
431 283-294 (2022).

432 140 Bal k, J. et al. The impact of the long-term application of mineral nitrogen and sewage sludge  
433 fertilizers on the quality of soil organic matter. *Chemical and Biological Technologies in*  
434 *Agriculture* 9, 86 (2022).

435 141 Cao, B. et al. Long-term nitrogen and straw application improves wheat production and soil  
436 organic carbon sequestration. *Journal of Soil Science and Plant Nutrition* 22, 3364-3376 (2022).

437 142 Bai, J. et al. Effects of sewage sludge application on plant growth and soil characteristics at a  
438 *Pinus sylvestris* var. *mongolica* plantation in Horqin sandy land. *Forests* 13, 984 (2022).

439 143 Ji, C. et al. Reductive soil disinfestation with biochar amendment modified microbial  
440 community composition in soils under plastic greenhouse vegetable production. *Soil and Tillage*  
441 *Research* 218, 105323 (2022).

442 144 Abagandura, G. O. et al. Soil labile carbon and nitrogen fractions after eleven years of manure  
443 and mineral fertilizer applications. *Archives of Agronomy and Soil Science* 69, 875-890 (2023).

444 145 Chen, K. et al. Effects of applying maize stover on soil diazotroph community diminish with  
445 depth. *Applied Soil Ecology* 179, 104573 (2022).

446 146 Chen, M. et al. Effects of organic fertilization on phosphorus availability and crop growth:  
447 Evidence from a 7-year fertilization experiment. *Archives of Agronomy and Soil Science* 69,  
448 2092-2103 (2023).

449 147 Du, L. et al. Fertilization regime shifts the molecular diversity and chlorine reactivity of soil  
450 dissolved organic matter from tropical croplands. *Water Research* 225, 119106 (2022).

451 148 Jiang, N. et al. Effects of straw and biochar amendment on hydrological fluxes of dissolved  
452 organic carbon in a subtropical montane agricultural landscape. *Environmental Pollution* 296,  
453 118751 (2022).

454 149 Jiang, S. et al. Field-scale fluorescence fingerprints of biochar-derived dissolved organic matter  
455 (DOM) provide an effective way to trace biochar migration and the downward co-migration of  
456 Pb, Cu and As in soil. *Chemosphere* 301, 134738 (2022).

457 150 Li, K. et al. Unveiling the role of dissolved organic matter on phosphorus sorption and  
458 availability in a 5-year manure amended paddy soil. *Science of the Total Environment* 838,  
459 155892 (2022).

460 151 Li, Y. et al. Biochar incorporation increases winter wheat (*Triticum aestivum* L.) production

with significantly improving soil enzyme activities at jointing stage. *Catena* 211, 105979 (2022).

152 Lin, S. et al. Combined slag and biochar amendments to subtropical paddy soils lead to a  
 153 short-term change of bacteria community structure and rise of soil organic carbon. *Applied Soil*  
 154 *Ecology* 179, 104593 (2022).

153 Liu, X. et al. Effects of nitrogen-enriched biochar on subtropical paddy soil organic carbon pool  
 154 dynamics. *Science of The Total Environment* 851, 158322 (2022).

154 Rombolà A. G. et al. Effect of biochar amendment on organic matter and dissolved organic  
 155 matter composition of agricultural soils from a two-year field experiment. *Science of The Total*  
 156 *Environment* 812, 151422 (2022).

155 Wang, H. et al. Variation in Soil Denitrification among Fertilization Regimes and Its Microbial  
 156 Mechanism. *Geomicrobiology Journal* 39, 722-730 (2022).

156 Issah, G., Schoenau, J. & Knight, J. Landscape position, sampling time, and tillage, but not  
 157 legume species, affect labile carbon and nitrogen fractions in a 4-yr-old rejuvenated grazed  
 158 pasture. *Canadian Journal of Soil Science* 101, 641-653 (2021).

157 Kobierski, M., Lemanowicz, J., Wojewódzki, P. & Kondratowicz-Maciejewska, K. The effect of  
 158 organic and conventional farming systems with different tillage on soil properties and enzymatic  
 159 activity. *Agronomy* 10, 1809 (2020).

158 Chen, J., Zhu, R., Zhang, Q., Kong, X. & Sun, D. Reduced-tillage management enhances soil  
 159 properties and crop yields in a alfalfa-corn rotation: Case study of the Songnen Plain, China.  
 160 *Scientific Reports* 9, 17064 (2019).

159 Ghimire, R., Norton, J. B., Stahl, P. D. & Norton, U. Soil microbial substrate properties and  
 160 microbial community responses under irrigated organic and reduced-tillage crop and forage  
 161 production systems. *PloS one* 9, e103901 (2014).

160 Dong, W., Hu, C., Chen, S. & Zhang, Y. Tillage and residue management effects on soil carbon  
 161 and CO<sub>2</sub> emission in a wheat-corn double-cropping system. *Nutrient Cycling in*  
 162 *Agroecosystems* 83, 27-37 (2009).

161 Virk, A. L. et al. Effects of diversified cropping sequences and tillage practices on soil organic  
 162 carbon, nitrogen, and associated fractions in the North China Plain. *Journal of Soil Science and*  
 163 *Plant Nutrition* 21, 1201-1212 (2021).

162 Qiu, Q. et al. Variability and controls of soil CO<sub>2</sub> fluxes under different tillage and crop residue  
 163 managements in a wheat-maize double-cropping system. *Environmental Science and Pollution*  
 164 *Research* 27, 45722-45736 (2020).

163 Debska, B., Jaskulska, I. & Jaskulski, D. Method of tillage with the factor determining the  
 164 quality of organic matter. *Agronomy* 10, 1250 (2020).

164 Rieder, Á. et al. Soil organic matter alteration velocity due to land-use change: A case study  
 165 under conservation agriculture. *Sustainability* 10, 943 (2018).

165 Sun, B., Hallett, P. D., Caul, S., Daniell, T. J. & Hopkins, D. W. Distribution of soil carbon and  
 166 microbial biomass in arable soils under different tillage regimes. *Plant and Soil* 338, 17-25  
 167 (2011).

166 Elmi, A. A., Madramootoo, C., Hamel, C. & Liu, A. Denitrification and nitrous oxide to nitrous  
 167 oxide plus dinitrogen ratios in the soil profile under three tillage systems. *Biology and Fertility*  
 168 *of Soils* 38, 340-348 (2003).

167 Tang, H. et al. Impacts of short-term tillage and crop residue incorporation managements on soil  
 168 microbial community in a double-cropping rice field. *Scientific Reports* 12, 2093 (2022).

505 168 Mchunu, C. N., Lorentz, S., Jewitt, G., Manson, A. & Chaplot, V. No-till impact on soil and soil  
506 organic carbon erosion under crop residue scarcity in Africa. *Soil Science Society of America*  
507 *Journal* 75, 1503-1512 (2011).

508 169 Mubekaphi, C. Soil organic carbon, glomalin related soil protein and related physical properties  
509 after 15 years of different management practices in a subtropical region of South Africa, (2019).

510 170 Rahmati, M. et al. Changes in soil organic carbon fractions and residence time five years after  
511 implementing conventional and conservation tillage practices. *Soil and Tillage Research* 200,  
512 104632 (2020).

513 171 Hao, Q., Cheng, B. & Jiang, C. Long-term tillage effects on soil organic carbon and dissolved  
514 organic carbon in a purple paddy soil of Southwest China. *Acta Ecologica Sinica* 33, 260-265  
515 (2013).

516 172 Si, P. et al. Effect of no-tillage with straw mulch and conventional tillage on soil organic carbon  
517 pools in Northern China. *Archives of Agronomy and Soil Science* 64, 398-408 (2018).

518 173 Hurisso, T. T., Norton, J. B. & Norton, U. Soil profile carbon and nitrogen in prairie, perennial  
519 grass-legume mixture and wheat-fallow production in the central High Plains, USA. *Agriculture,*  
520 *ecosystems & environment* 181, 179-187 (2013).

521 174 Carrillo-Gonzalez, R., Gonzalez-Chavez, M., Aitkenhead-Peterson, J., Hons, F. & Loeppert, R.  
522 Extractable DOC and DON from a dry-land long-term rotation and cropping system in Texas,  
523 USA. *Geoderma* 197, 79-86 (2013).

524 175 Gao, Y. et al. Effect of tillage practices on soil CO<sub>2</sub> emissions, microbial C-fixation, and  
525 C-degradation functional gene abundance in Northeast China. *Journal of Soils and Sediments* 23,  
526 446-458 (2023).

527 176 Jia, L. et al. Keystone microbiome in the rhizosphere soil reveals the effect of long-term  
528 conservation tillage on crop growth in the Chinese Loess Plateau. *Plant and Soil* 473, 457-472  
529 (2022).

530 177 Fisk, L., Barton, L., Maccarone, L., Jenkins, S. & Murphy, D. Seasonal dynamics of  
531 ammonia-oxidizing bacteria but not archaea influence soil nitrogen cycling in a semi-arid  
532 agricultural soil. *Scientific Reports* 12, 7299 (2022).

533 178 Sarker, M. R. et al. Conservation tillage and residue management improve soil health and crop  
534 productivity—Evidence from a rice-maize cropping system in Bangladesh. *Frontiers in*  
535 *Environmental Science* 10, 969819 (2022).

536 179 Li, N., Lei, W., Sheng, M., Long, J. & Han, Z. Straw amendment and soil tillage alter soil  
537 organic carbon chemical composition and are associated with microbial community structure.  
538 *European Journal of Soil Biology* 110, 103406 (2022).

539 180 Cui, J. et al. Nutrient availability is a dominant predictor of soil bacterial and fungal community  
540 composition after nitrogen addition in subtropical acidic forests. *PLoS One* 16, e0246263  
541 (2021).

542 181 Zhou, J. et al. Nitrogen addition affects soil respiration primarily through changes in microbial  
543 community structure and biomass in a subtropical natural forest. *Forests* 10, 435 (2019).

544 182 Zhang, H., Liu, Y., Zhou, Z. & Zhang, Y. Inorganic nitrogen addition affects soil respiration and  
545 belowground organic carbon fraction for a *Pinus tabuliformis* forest. *Forests* 10, 369 (2019).

546 183 Song, Y. et al. Short-term response of the soil microbial abundances and enzyme activities to  
547 experimental warming in a boreal peatland in Northeast China. *Sustainability* 11, 590 (2019).

548 184 Li, Y. et al. Divergent responses of soil carbon and nitrogen pools to short-term nitrogen

addition between two plantations in Northeast China. *International Journal of Agricultural and Biological Engineering* 12, 82-90 (2019).

185 Dong, D., Shi, C., Yan, S. & Ashraf, M. Effects of elevated atmospheric CO<sub>2</sub>, O<sub>3</sub> and soil phenanthrene on soil enzyme activities and microbial biomass. *Applied Ecology and Environmental Research* 17, 8501-8512 (2019).

186 Chen, L. et al. Differential responses of net N mineralization and nitrification to throughfall reduction in a *Castanopsis hystrix* plantation in southern China. *Forest Ecosystems* 6, 1-11 (2019).

187 Zhou, S., Xiang, Y., Tie, L., Han, B. & Huang, C. Simulated nitrogen deposition significantly reduces soil respiration in an evergreen broadleaf forest in western China. *PLoS One* 13, e0204661 (2018).

188 Yue, P. et al. Impact of elevated precipitation, nitrogen deposition and warming on soil respiration in a temperate desert. *Biogeosciences* 15, 2007-2019 (2018).

189 Olatunji, O. A. et al. The responses of soil microbial community and enzyme activities of *Phoebe zhennan* cultivated under different soil moisture conditions to phosphorus addition. *iForest-Biogeosciences and Forestry* 11, 751 (2018).

190 Ma, J., Kang, F., Cheng, X. & Han, H. Response of soil organic carbon and nitrogen to nitrogen deposition in a *Larix principis-rupprechtii* plantation. *Scientific Reports* 8, 8638 (2018).

191 Lv, F., Xue, S., Wang, G. & Zhang, C. Nitrogen addition shifts the microbial community in the rhizosphere of *Pinus tabulaeformis* in Northwestern China. *PLoS One* 12, e0172382 (2017).

192 Hu, Y. et al. Climate change affects soil labile organic carbon fractions in a Tibetan alpine meadow. *Journal of Soils and Sediments* 17, 326-339 (2017).

193 van Gestel, N. C., Dhungana, N., Tissue, D. T. & Zak, J. C. Seasonal microbial and nutrient responses during a 5-year reduction in the daily temperature range of soil in a Chihuahuan Desert ecosystem. *Oecologia* 180, 265-277 (2016).

194 Chen, D. et al. Response of soil carbon and nitrogen to 15-year experimental warming in two alpine habitats (*kobresia* meadow and *potentilla* shrubland) on the Qinghai-Tibetan Plateau. *Polish Journal of Environmental Studies* 25, 2305-2313 (2016).

195 Song, Y. et al. Short-term effect of nitrogen addition on litter and soil properties in *Calamagrostis angustifolia* freshwater marshes of Northeast China. *Wetlands* 33, 505-513 (2013).

196 Song, B. et al. Light and heavy fractions of soil organic matter in response to climate warming and increased precipitation in a temperate steppe. *PloS one* 7, e33217 (2012).

197 Li, L.-J., Zeng, D.-H., Yu, Z.-Y., Fan, Z.-P. & Mao, R. Soil microbial properties under N and P additions in a semi-arid, sandy grassland. *Biology and Fertility of Soils* 46, 653-658 (2010).

198 Carol Adair, E. & Burke, I. C. Plant phenology and life span influence soil pool dynamics: *Bromus tectorum* invasion of perennial C 3–C 4 grass communities. *Plant and soil* 335, 255-269 (2010).

199 Liu, Y. et al. Nitrogen addition promotes soil phosphorus availability in the subalpine forest of eastern Tibetan Plateau. *Journal of Soils and Sediments*, 1-11 (2022).

200 Wu, Y. et al. Nitrous oxide emissions from an alpine grassland as affected by nitrogen addition. *Atmosphere* 12, 976 (2021).

201 Dai, Y. et al. Response of soil bacterial communities to nitrogen and phosphorus additions in an age-sequence of subtropical forests. *iForest-Biogeosciences and Forestry* 14, 71 (2021).

- 202 Wang, J.-J. et al. Long-term nitrogen addition alters the composition of soil-derived dissolved  
organic matter. *ACS Earth and Space Chemistry* 4, 189-201 (2019).
- 203 Liu, X., Lamb, E. G. & Zhang, S. Nitrogen addition impacts on soil microbial stoichiometry are  
driven by changes in plant resource stoichiometry not by the composition of main microbial  
groups in an alpine meadow. *Biology and fertility of soils* 56, 261-271 (2020).
- 204 Choma, M. et al. Bacteria but not fungi respond to soil acidification rapidly and consistently in  
both a spruce and beech forest. *FEMS Microbiology Ecology* 96, fiae174 (2020).
- 205 Ataka, M., Sun, L., Nakaji, T., Katayama, A. & Hiura, T. Five-year nitrogen addition affects fine  
root exudation and its correlation with root respiration in a dominant species, *Quercus crispula*,  
of a cool temperate forest, Japan. *Tree physiology* 40, 367-376 (2020).
- 206 Phillips, C. A., Elberling, B. & Michelsen, A. Soil carbon and nitrogen stocks and turnover  
following 16 years of warming and litter addition. *Ecosystems* 22, 110-124 (2019).
- 207 Yuan, X. et al. Effects of short-term warming and nitrogen addition on the quantity and quality  
of dissolved organic matter in a subtropical *Cunninghamia lanceolata* plantation. *Plos one* 13,  
e0191403 (2018).
- 208 Jung, K., Kwak, J.-H., Gilliam, F. S. & Chang, S. X. Simulated N and S deposition affected soil  
chemistry and understory plant communities in a boreal forest in western Canada. *Journal of  
plant ecology* 11, 511-523 (2018).
- 209 Gong, Y., Wu, J., Vogt, J., Le, T. B. & Yuan, T. Combination of warming and vegetation  
composition change strengthens the environmental controls on N<sub>2</sub>O fluxes in a boreal peatland.  
*Atmosphere* 9, 480 (2018).
- 210 Chen, G.-t., Tu, L.-h., Chen, G.-s., Hu, J.-y. & Han, Z.-l. Effect of six years of nitrogen additions  
on soil chemistry in a subtropical *Pleiblastus amarus* forest, Southwest China. *Journal of  
forestry research* 29, 1657-1664 (2018).
- 211 Zhang, K. et al. Impact of nitrogen fertilization on soil–Atmosphere greenhouse gas exchanges  
in eucalypt plantations with different soil characteristics in southern China. *Plos one* 12,  
e0172142 (2017).
- 212 Wang, Y., Wang, H., He, J.-S. & Feng, X. Iron-mediated soil carbon response to water-table  
decline in an alpine wetland. *Nature communications* 8, 15972 (2017).
- 213 Ritson, J. P. et al. The effect of drought on dissolved organic carbon (DOC) release from  
peatland soil and vegetation sources. *Biogeosciences* 14, 2891-2902 (2017).
- 214 Niboyet, A., Bardoux, G., Barot, S. & Bloor, J. M. Elevated CO<sub>2</sub> mediates the short-term  
drought recovery of ecosystem function in low-diversity grassland systems. *Plant and soil* 420,  
289-302 (2017).
- 215 Lei, Z., Sun, H., Li, Q., Zhang, J. & Song, X. Effects of nitrogen deposition on soil dissolved  
organic carbon and nitrogen in Moso bamboo plantations strongly depend on management  
practices. *Forests* 8, 452 (2017).
- 216 Jia, X., Liu, T., Zhao, Y., He, Y. & Yang, M. Elevated atmospheric CO<sub>2</sub> affected photosynthetic  
products in wheat seedlings and biological activity in rhizosphere soil under cadmium stress.  
*Environmental Science and Pollution Research* 23, 514-526 (2016).
- 217 He, D. et al. Composition of the soil fungal community is more sensitive to phosphorus than  
nitrogen addition in the alpine meadow on the Qinghai-Tibetan Plateau. *Biology and Fertility of  
Soils* 52, 1059-1072 (2016).
- 218 Hasegawa, S., Macdonald, C. A. & Power, S. A. Elevated carbon dioxide increases soil nitrogen

and phosphorus availability in a phosphorus-limited Eucalyptus woodland. *Global Change Biology* 22, 1628-1643 (2016).

219 Carrillo, Y., Dijkstra, F. A., LeCain, D. & Pendall, E. Mediation of soil C decomposition by  
arbuscular mycorrhizal fungi in grass rhizospheres under elevated CO<sub>2</sub>. *Biogeochemistry* 127,  
45-55 (2016).

220 Cai, Y., Chang, S. X., Ma, B. & Bork, E. W. Watering increased DOC concentration but  
decreased N<sub>2</sub>O emission from a mixed grassland soil under different defoliation regimes.  
*Biology and Fertility of Soils* 52, 987-996 (2016).

221 Gao, Y., Zeng, X., Xie, Q. & Ma, X. Release of carbon and nitrogen from alpine soils during  
thawing periods in the eastern Qinghai-Tibet Plateau. *Water, Air, & Soil Pollution* 226, 1-9  
(2015).

222 Fang, H. et al. Elevated atmospheric carbon dioxide concentration stimulates soil microbial  
activity and impacts water-extractable organic carbon in an agricultural soil. *Biogeochemistry*  
122, 253-267 (2015).

223 Xu, M. et al. Low-level nitrogen addition promotes net methane uptake in a boreal forest across  
the Great Xing'an Mountain Region, China. *Forest Science* 60, 973-981 (2014).

224 Li, T., Tao, Q., Liang, C. & Yang, X. Elevated CO<sub>2</sub> concentration increase the mobility of Cd  
and Zn in the rhizosphere of hyperaccumulator *Sedum alfredii*. *Environmental science and  
pollution research* 21, 5899-5908 (2014).

225 Kane, E. S. et al. Peat porewater dissolved organic carbon concentration and lability increase  
with warming: a field temperature manipulation experiment in a poor-fen. *Biogeochemistry* 119,  
161-178 (2014).

226 Huang, J., Richard, H. & Zheng, S. Effects of nitrogen fertilization on soil labile carbon  
fractions of freshwater marsh soil in Northeast China. *International Journal of Environmental  
Science and Technology* 11, 2009-2014 (2014).

227 Delarue, F. et al. Indirect effects of experimental warming on dissolved organic carbon content  
in subsurface peat. *Journal of soils and sediments* 14, 1800-1805 (2014).

228 Lu, X. et al. Long-term nitrogen addition decreases carbon leaching in a nitrogen-rich forest  
ecosystem. *Biogeosciences* 10, 3931-3941 (2013).

229 Lovett, G. M., Arthur, M. A., Weathers, K. C., Fitzhugh, R. D. & Templer, P. H. Nitrogen  
addition increases carbon storage in soils, but not in trees, in an eastern US deciduous forest.  
*Ecosystems* 16, 980-1001 (2013).

230 Haei, M., Öquist, M. G., Ilstedt, U. & Laudon, H. The influence of soil frost on the quality of  
dissolved organic carbon in a boreal forest soil: combining field and laboratory experiments.  
*Biogeochemistry* 107, 95-106 (2012).

231 Carrillo, Y., Dijkstra, F. A., Pendall, E., Morgan, J. A. & Blumenthal, D. M. Controls over soil  
nitrogen pools in a semiarid grassland under elevated CO<sub>2</sub> and warming. *Ecosystems* 15,  
761-774 (2012).

232 Cusack, D. F., Silver, W. L., Torn, M. S. & McDowell, W. H. Effects of nitrogen additions on  
above-and belowground carbon dynamics in two tropical forests. *Biogeochemistry* 104, 203-225  
(2011).

233 Helliwell, R., Britton, A., Gibbs, S., Fisher, J. & Potts, J. Interactive effects of N deposition, land  
management and weather patterns on soil solution chemistry in a Scottish alpine heath.  
*Ecosystems* 13, 696-711 (2010).

681 234 Hagedorn, F. et al. Short-term responses of ecosystem carbon fluxes to experimental soil  
682 warming at the Swiss alpine treeline. *Biogeochemistry* 97, 7-19 (2010).

683 235 Junod, J. et al. Effect of irrigation levels on dissolved organic carbon soil distribution and the  
684 depth mobility of chlorpyrifos. *Chilean journal of agricultural research* 69, 435-444 (2009).

685 236 Fang, Y. et al. Large loss of dissolved organic nitrogen from nitrogen-saturated forests in  
686 subtropical China. *Ecosystems* 12, 33-45 (2009).

687 237 Kim, S.-Y. & Kang, H. Effects of elevated CO<sub>2</sub> on below-ground processes in temperate marsh  
688 microcosms. *Hydrobiologia* 605, 123-130 (2008).

689 238 Waldrop, M. P. & Zak, D. R. Response of oxidative enzyme activities to nitrogen deposition  
690 affects soil concentrations of dissolved organic carbon. *Ecosystems* 9, 921-933 (2006).

691 239 Scheuner, E. T. & Makeschin, F. Impact of atmospheric nitrogen deposition on carbon dynamics  
692 in two Scots pine forest soils of Northern Germany. *Plant and soil* 275, 43-54 (2005).

693 240 Marsh, A. S., Rasse, D. P., Drake, B. G. & Patrick Megonigal, J. Effect of elevated CO<sub>2</sub> on  
694 carbon pools and fluxes in a brackish marsh. *Estuaries* 28, 694-704 (2005).

695 241 Pregitzer, K. S., Zak, D. R., Burton, A. J., Ashby, J. A. & MacDonald, N. W. Chronic nitrate  
696 additions dramatically increase the export of carbon and nitrogen from northern hardwood  
697 ecosystems. *Biogeochemistry* 68, 179-197 (2004).

698 242 King, J. et al. Fine-root biomass and fluxes of soil carbon in young stands of paper birch and  
699 trembling aspen as affected by elevated atmospheric CO<sub>2</sub> and tropospheric O<sub>3</sub>. *Oecologia* 128,  
700 237-250 (2001).

701 243 Magill, A. H. et al. Long-term nitrogen additions and nitrogen saturation in two temperate  
702 forests. *Ecosystems* 3, 238-253 (2000).

703 244 Lamontagne, S. & Schiff, S. L. The Response of a Heterogeneous Upland Boreal Shield  
704 Catchment to a Short Term NO<sub>3</sub>-Addition. *Ecosystems* 2, 460-473 (1999).

705 245 McDowell, W. H., Currie, W. S., Aber, J. D. & Yang, Y. in *Biogeochemical Investigations at*  
706 *Watershed, Landscape, and Regional Scales: Refereed papers from BIOGEMON, The Third*  
707 *International Symposium on Ecosystem Behavior; Co-Sponsored by Villanova University and*  
708 *the Czech Geological Survey; held at Villanova University, Villanova Pennsylvania, USA, June*  
709 *21–25, 1997.* 175-182 (Springer).

710 246 Currie, W. S., Aber, J. D., McDowell, W. H., Boone, R. D. & Magill, A. H. Vertical transport of  
711 dissolved organic C and N under long-term N amendments in pine and hardwood forests.  
712 *Biogeochemistry* 35, 471-505 (1996).

713 247 Voigt, C. et al. Warming of subarctic tundra increases emissions of all three important  
714 greenhouse gases—carbon dioxide, methane, and nitrous oxide. *Global Change Biology* 23,  
715 3121-3138 (2017).

716 248 Basiliko, N., Moore, T. R., Jeannotte, R. & Bubier, J. L. Nutrient input and carbon and microbial  
717 dynamics in an ombrotrophic bog. *Geomicrobiology Journal* 23, 531-543 (2006).

718 249 Hu, Y.-L., Jung, K., Zeng, D.-H. & Chang, S. X. Nitrogen-and sulfur-deposition-altered soil  
719 microbial community functions and enzyme activities in a boreal mixedwood forest in western  
720 Canada. *Canadian Journal of Forest Research* 43, 777-784 (2013).

721 250 Strack, M., Munir, T. M. & Khadka, B. Shrub abundance contributes to shifts in dissolved  
722 organic carbon concentration and chemistry in a continental bog exposed to drainage and  
723 warming. *Ecohydrology* 12, e2100 (2019).

724 251 Fouché J., Keller, C., Allard, M. & Ambrosi, J. P. Increased CO<sub>2</sub> fluxes under warming tests

- and soil solution chemistry in Histic and Turbic Cryosols, Salluit, Nunavik, Canada. *Soil Biology and Biochemistry* 68, 185-199 (2014).
- 252 Peplau, T., Schroeder, J., Gregorich, E. & Poeplau, C. Long-term geothermal warming reduced  
stocks of carbon but not nitrogen in a subarctic forest soil. *Global Change Biology* 27,  
5341-5355 (2021).
- 253 Gong, Y., Wu, J., Sey, A. A. & Le, T. B. Nitrogen addition ( $\text{NH}_4\text{NO}_3$ ) mitigates the positive  
effect of warming on methane fluxes in a coastal bog. *Catena* 203, 105356 (2021).
- 254 Schleuss, P.-M. et al. Stoichiometric controls of soil carbon and nitrogen cycling after long-term  
nitrogen and phosphorus addition in a mesic grassland in South Africa. *Soil Biology and  
Biochemistry* 135, 294-303 (2019).
- 255 Widdig, M. et al. Microbial carbon use efficiency in grassland soils subjected to nitrogen and  
phosphorus additions. *Soil Biology and Biochemistry* 146, 107815 (2020).
- 256 Spohn, M. & Schleuss, P.-M. Addition of inorganic phosphorus to soil leads to desorption of  
organic compounds and thus to increased soil respiration. *Soil Biology and Biochemistry* 130,  
220-226 (2019).
- 257 Oulehle, F. et al. Soil–solution partitioning of DOC in acid organic soils: results from a UK field  
acidification and alkalization experiment. *European Journal of Soil Science* 64, 787-796 (2013).
- 258 Hagedorn, F., Kammer, A., Schmidt, M. W. & Goodale, C. L. Nitrogen addition alters  
mineralization dynamics of 13 C-depleted leaf and twig litter and reduces leaching of older  
DOC from mineral soil. *Global Change Biology* 18, 1412-1427 (2012).
- 259 Seifert-Monson, L. et al. Effects of sulfate deposition on pore water dissolved organic carbon,  
nutrients, and microbial enzyme activities in a northern peatland. *Soil Biology and Biochemistry*  
79, 91-99 (2014).
- 260 Wang, M. et al. Long-term warming increased microbial carbon use efficiency and turnover rate  
under conservation tillage system. *Soil Biology and Biochemistry* 172, 108770 (2022).
- 261 Niu, G. et al. Do long-term high nitrogen inputs change the composition of soil dissolved  
organic matter in a primary tropical forest? *Environmental Research Letters* 17, 095015 (2022).
- 262 Querejeta, J. I. et al. Lower relative abundance of ectomycorrhizal fungi under a warmer and  
drier climate is linked to enhanced soil organic matter decomposition. *New Phytologist* 232,  
1399-1413 (2021).
- 263 Wang, H. et al. Effects of simulated nitrogen deposition on soil active carbon fractions in a wet  
meadow in the Qinghai-Tibet Plateau. *Journal of Soil Science and Plant Nutrition* 22, 2943-2954  
(2022).
- 264 Yuan, X. et al. Effects of nitrogen addition on the concentration and composition of soil-based  
dissolved organic matter in subtropical *Pinus taiwanensis* forests. *Journal of Soils and Sediments*  
22, 1924-1937 (2022).
- 265 Zhang, J. et al. Ten years of warming increased plant-derived carbon accumulation in an East  
Asian monsoon forest. *Plant and Soil* 481, 349-365 (2022).
- 266 Lu, F. et al. Long-term phosphorus addition strongly weakens the carbon sink function of a  
temperate peatland. *Ecosystems* 26, 201-216 (2023).
- 267 Yang, Y. et al. Soil enzyme activity regulates the response of soil C fluxes to N fertilization in a  
temperate cultivated grassland. *Atmosphere* 13, 777 (2022).
- 268 Weng, X., Sui, X., Liu, Y., Yang, L. & Zhang, R. Effect of nitrogen addition on the carbon  
metabolism of soil microorganisms in a *Calamagrostis angustifolia* wetland of the Sanjiang

769 Plain, northeastern China. *Annals of Microbiology* 72, 18 (2022).

770 269 Dong, L., Berg, B., Gu, W., Wang, Z. & Sun, T. Effects of different forms of nitrogen addition  
771 on microbial extracellular enzyme activity in temperate grassland soil. *Ecological Processes* 11,  
772 36 (2022).

773 270 Li, L. et al. Joint control by soil moisture, functional genes and substrates on response of N<sub>2</sub>O  
774 flux to climate extremes in a semiarid grassland. *Agricultural and Forest Meteorology* 316,  
775 108854 (2022).

776 271 Liao, L. et al. Differential effects of nitrogen addition on the organic carbon fractions of  
777 rhizosphere and bulk soil based on a pot experiment. *Journal of Soils and Sediments* 23,  
778 103-117 (2023).

779 272 Wang, Y., Hu, Z., Liu, C., Wu, Z. & Chen, S. Methane emissions in japonica rice paddy fields  
780 under different elevated CO<sub>2</sub> concentrations. *Nutrient Cycling in Agroecosystems* 122, 173-189  
781 (2022).

782 273 Oestmann, J., Dettmann, U., Dövel, D. & Tiemeyer, B. Experimental warming increased  
783 greenhouse gas emissions of a near-natural peatland and Sphagnum farming sites. *Plant and Soil*  
784 480, 85-104 (2022).

785 274 Chen, W. et al. Divergent responses of soil microbial functional groups to long-term high  
786 nitrogen presence in the tropical forests. *Science of The Total Environment* 821, 153251 (2022).

787 275 Chen, Y. et al. The stimulatory effect of elevated CO<sub>2</sub> on soil respiration is unaffected by N  
788 addition. *Science of The Total Environment* 813, 151907 (2022).

789 276 Guo, Y. et al. Effects of nitrogen and water addition on N<sub>2</sub>O emissions in temperate grasslands,  
790 northern China. *Applied Soil Ecology* 177, 104548 (2022).

791 277 Li, N. et al. Combined livestock grazing-exclusion and global warming decreases nitrogen  
792 mineralization by changing soil microbial community in a Tibetan alpine meadow. *Catena* 219,  
793 106589 (2022).

794 278 Li, N. et al. Response of cbbL-harboring microorganisms to precipitation changes in a  
795 naturally-restored grassland. *Science of The Total Environment* 838, 156191 (2022).

796 279 Luo, L. et al. Effects of mycorrhiza and hyphae on the response of soil microbial community to  
797 warming in eastern Tibetan Plateau. *Science of The Total Environment* 837, 155498 (2022).

798 280 Wang, T. et al. Simultaneous Measurements of Dissolved Organic Carbon and Soil Respiration  
799 Reveal Reduced Soil Carbon Loss Under Nitrogen Addition in a Montane Forest. *Journal of*  
800 *Geophysical Research: Biogeosciences* 127, e2022JG006829 (2022).

801 281 Wu, G. et al. Effects of soil warming and straw return on soil organic matter and greenhouse gas  
802 fluxes in winter wheat seasons in the North China Plain. *Journal of Cleaner Production* 356,  
803 131810 (2022).

804 282 Yuan, X. et al. Relationship between soil bacterial communities and dissolved organic matter in  
805 a subtropical *Pinus taiwanensis* forest after short-term nitrogen addition. *Forest Ecology and*  
806 *Management* 512, 120165 (2022).

807 283 Wang, M. et al. Dissolved organic matter characteristics and important site factors in a  
808 subtropical mountain forest in central China. *Forest Science* 66, 49-57 (2020).

809 284 Teng, Z., Fan, W., Wang, H., Cao, X. & Xu, X. Monitoring soil microorganisms with  
810 community-level physiological profiles using Biolog EcoPlates™ in Chaohu lakeside wetland,  
811 East China. *Eurasian Soil Science* 53, 1142-1153 (2020).

812 285 Rousset, C., Clough, T. J., Grace, P. R., Rowlings, D. W. & Scheer, C. Soil type, bulk density

813 and drainage effects on relative gas diffusivity and N<sub>2</sub>O emissions. *Soil Research* 58, 726-736  
814 (2020).

815 286 Qin, X.-q. et al. Characterizing soil dissolved organic matter in typical soils from China using  
816 fluorescence EEM-PARAFAC and UV-visible absorption. *Aquatic Geochemistry* 26, 71-88  
817 (2020).

818 287 Lu, T., Wang, X. & Zhang, W. Total and dissolved soil organic and inorganic carbon and their  
819 relationships in typical loess cropland of Fengu Basin. *Geoscience Letters* 7, 1-13 (2020).

820 288 Kouchou, A. et al. Evaluation of the environmental and human health risk related to metallic  
821 contamination in agricultural soils in the Mediterranean semi-arid area (Saiss plain, Morocco).  
822 *Environmental earth sciences* 79, 1-22 (2020).

823 289 Kholodov, V. et al. Optical properties of the extractable organic matter fractions in typical  
824 chernozems of long-term field experiments. *Eurasian Soil Science* 53, 739-748 (2020).

825 290 Kharitonova, G. V., Kot, F. S. & Krutikova, V. O. Carbonate and concomitant microaggregation  
826 in irrigated Mediterranean soils of Israel. *Irrigation Science* 38, 431-447 (2020).

827 291 Jeanneau, L. et al. Water table dynamics control carbon losses from the destabilization of soil  
828 organic matter in a small, lowland agricultural catchment. *Soil Systems* 4, 2 (2019).

829 292 Imran, M. et al. Soil selenium transformation across different parent materials in Pothwar  
830 uplands of Pakistan. *Arabian Journal of Geosciences* 13, 1-16 (2020).

831 293 Ide, J. i. et al. Molecular composition of soil dissolved organic matter in recently-burned and  
832 long-unburned boreal forests. *International Journal of Wildland Fire* 29, 541-547 (2020).

833 294 Hailegnaw, N. S. et al. The role of biochar and soil properties in determining the available  
834 content of Al, Cu, Zn, Mn, and Cd in soil. *Agronomy* 10, 885 (2020).

835 295 Gök, G. & Gürbüz, O. A. Application of geostatistics for grid and random sampling schemes for  
836 a grassland in Nigde, Turkey. *Environmental monitoring and assessment* 192, 1-12 (2020).

837 296 Fovet, O., Cooper, D. M., Jones, D. L., Jones, T. G. & Evans, C. D. Dynamics of dissolved  
838 organic matter in headwaters: comparison of headwater streams with contrasting DOM and  
839 nutrient composition. *Aquatic sciences* 82, 1-12 (2020).

840 297 Curtin, D. et al. Exchangeable cation effects on hot water extractable carbon and nitrogen in  
841 agricultural soils. *Soil research* 58, 356-363 (2020).

842 298 Croat, S., DeSutter, T., Casey, F. & O'Brien, P. Phosphorus sorption and desorption in soils  
843 treated by thermal desorption. *Water, Air, & Soil Pollution* 231, 1-9 (2020).

844 299 Connolly, C. T., Cardenas, M. B., Burkart, G. A., Spencer, R. G. & McClelland, J. W.  
845 Groundwater as a major source of dissolved organic matter to Arctic coastal waters. *Nature*  
846 *Communications* 11, 1479 (2020).

847 300 Chibuike, G. et al. Denitrification capacity of hill country wet and dry area soils as influenced  
848 by dissolved organic carbon concentration and chemistry. *Wetlands* 40, 681-691 (2020).

849 301 Azam, A. et al. Changes in soil organic carbon fractions across a loess toposequence. *Journal of*  
850 *Soil Science and Plant Nutrition* 20, 1193-1202 (2020).

851 302 Zhang, H., Li, Y., Pang, M., Xi, M. & Kong, F. Responses of contents and structure of DOM to  
852 *Spartina alterniflora* invasion in Yanghe estuary wetland of Jiaozhou Bay, China. *Wetlands* 39,  
853 729-741 (2019).

854 303 Zeh, L., Limpens, J., Erhagen, B., Bragazza, L. & Kalbitz, K. Plant functional types and  
855 temperature control carbon input via roots in peatland soils. *Plant and Soil* 438, 19-38 (2019).

856 304 Wang, T., Zhao, X., Wang, C., Huang, Z. & Liu, S. Analysis of three-dimensional fluorescence

spectrum characteristics of water extractable organic matter in Mollisols after different years of cultivation. *Applied Ecology & Environmental Research* 17 (2019).

305 Thieme, L. et al. Dissolved organic matter characteristics of deciduous and coniferous forests with variable management: different at the source, aligned in the soil. *Biogeosciences* 16, 1411-1432 (2019).

306 Stutz, K. P. et al. Lignin from white-rotted European beech deadwood and soil functions. *Biogeochemistry* 145, 81-105 (2019).

307 Ritson, J. et al. Sources of dissolved organic carbon (DOC) in a mixed land use catchment (Exe, UK). *Science of the total environment* 666, 165-175 (2019).

308 Pintaldi, E., Viglietti, D., D'Amico, M. E., Magnani, A. & Freppaz, M. Abiotic Parameters and pedogenesis as controlling factors for soil C and N cycling along an elevational gradient in a Subalpine Larch Forest (NW Italy). *Forests* 10, 614 (2019).

309 Petrash, D. A. et al. Spatially resolved soil solution chemistry in a central European atmospherically polluted high-elevation catchment. *Soil* 5, 205-221 (2019).

310 Peach, M. E., Ogden, L. A., Mora, E. A. & Friedland, A. J. Building houses and managing lawns could limit yard soil carbon for centuries. *Carbon balance and management* 14, 1-14 (2019).

311 Nie, X. et al. Effects of water erosion on soil organic carbon stability in the subtropical China. *Journal of soils and sediments* 19, 3564-3575 (2019).

312 Liu, J. et al. Rice-paddy field acts as a buffer system to decrease the terrestrial characteristics of dissolved organic matter exported from a typical small agricultural watershed in the Three Gorges Reservoir Area, China. *Environmental Science and Pollution Research* 26, 23873-23885 (2019).

313 Li, S. et al. Compositional and chemical characteristics of dissolved organic matter in various types of cropped and natural Chinese soils. *Chemical and biological technologies in agriculture* 6, 1-11 (2019).

314 Hunziker, M., Arnalds, O. & Kuhn, N. J. Evaluating the carbon sequestration potential of volcanic soils in southern Iceland after birch afforestation. *Soil* 5, 223-238 (2019).

315 Fu, J. et al. Dissolved organic carbon leaching from montane grasslands under contrasting climate, soil and management conditions. *Biogeochemistry* 145, 47-61 (2019).

316 Freppaz, M., Viglietti, D., Balestrini, R., Lonati, M. & Colombo, N. Climatic and pedoclimatic factors driving C and N dynamics in soil and surface water in the alpine tundra (NW-Italian Alps). *Nature Conservation* 34, 67-90 (2019).

317 Faghih, F., Emadi, M., Sadegh-Zadeh, F. & Bahmanyar, M. A. Long-term charcoal-induced changes to soil properties in temperate regions of northern Iran. *Journal of forestry research* 30, 1063-1071 (2019).

318 Dublet, G. et al. Colloidal size and redox state of uranium species in the porewater of a pristine mountain wetland. *Environmental science & technology* 53, 9361-9369 (2019).

319 Drozdova, O. Y. et al. Organic Matter Transformation in the Conjugate Series of Surface Water in Northern Karelia. *Water resources* 46, 52-58 (2019).

320 Dalmagro, H. J. et al. Streams with riparian forest buffers versus impoundments differ in discharge and DOM characteristics for pasture catchments in Southern Amazonia. *Water* 11, 390 (2019).

321 Chiu, T.-P., Huang, W.-S., Chen, T.-C. & Yeh, Y.-L. Fluorescence characteristics of dissolved organic matter (DOM) in percolation water and lateral seepage affected by soil solution (SS) in

901 a lysimeter test. *Sensors* 19, 4016 (2019).

902 322 Cao, Z. et al. Past aridity's effect on carbon mineralization potentials in grassland soils.  
903 *Biogeosciences* 16, 3605-3619 (2019).

904 323 Balestrini, R. et al. Dynamic of nitrogen and dissolved organic carbon in an alpine forested  
905 catchment: atmospheric deposition and soil solution trends. *Nature Conservation* 34, 41-66  
906 (2019).

907 324 Xiaodong Zheng, X. C., Chengming Liang, Y. H. & Jinshui Wu, Y. S. Influence of extractants  
908 and filter materials in the extraction of dissolved organic matter (DOM) from subtropical  
909 agricultural soil. *Emirates Journal of Food and Agriculture*, 165-172 (2018).

910 325 Zhang, Y., Duan, P., Zhang, P. & Li, M. Variations in cyanobacterial and algal communities and  
911 soil characteristics under biocrust development under similar environmental conditions. *Plant  
912 and soil* 429, 241-251 (2018).

913 326 Yang, Y. et al. Effects of different land types on soil enzyme activity in the Qinghai Lake region.  
914 *Wetlands* 38, 711-721 (2018).

915 327 Xu, B., Wang, J., Wu, N., Wu, Y. & Shi, F. Seasonal and interannual dynamics of soil microbial  
916 biomass and available nitrogen in an alpine meadow in the eastern part of Qinghai–Tibet Plateau,  
917 China. *Biogeosciences* 15, 567-579 (2018).

918 328 Wu, Y., Shaaban, M., Peng, Q. a., Zhou, A. q. & Hu, R. Impacts of earthworm activity on the  
919 fate of straw carbon in soil: a microcosm experiment. *Environmental Science and Pollution  
920 Research* 25, 11054-11062 (2018).

921 329 Song, G., Novotny, E. H., Richards, K. G. & Hayes, M. H. Characteristics of hydrophobic and  
922 hydrophilic acid fractions in drainage waters of undisturbed soil lysimeters. *Journal of soils and  
923 sediments* 18, 3197-3214 (2018).

924 330 Shen, Y. et al. Labile organic carbon pools and enzyme activities of *Pinus massoniana* plantation  
925 soil as affected by understory vegetation removal and thinning. *Scientific reports* 8, 573 (2018).

926 331 Rosa, E. & Debska, B. Seasonal changes in the content of dissolved organic matter in arable  
927 soils. *Journal of Soils and Sediments* 18, 2703-2714 (2018).

928 332 Nygaard, P. H., Strand, L. T. & Stuanes, A. O. Gap formation and dynamics after long-term  
929 steady state in an old-growth *Picea abies* stand in Norway: Above-and belowground interactions.  
930 *Ecology and evolution* 8, 462-476 (2018).

931 333 Nakhavali, M. et al. Representation of dissolved organic carbon in the JULES land surface  
932 model (vn4. 4\_JULES-DOCM). *Geoscientific Model Development* 11, 593-609 (2018).

933 334 Li, D. et al. Cadmium bioavailability well assessed by DGT and factors influencing cadmium  
934 accumulation in rice grains from paddy soils of three parent materials. *Journal of soils and  
935 sediments* 18, 2552-2561 (2018).

936 335 Kov, R. et al. A farm-scale investigation of the organic matter composition and soil chemistry of  
937 Andisols as influenced by land use and management. *Biogeochemistry* 140, 65-79 (2018).

938 336 Kobierski, M., Kondratowicz-Maciejewska, K., Banach-Szott, M., Wojewódzki, P. & Peñas  
939 Castejón, J. M. Humic substances and aggregate stability in rhizospheric and non-rhizospheric  
940 soil. *Journal of Soils and Sediments* 18, 2777-2789 (2018).

941 337 Homyak, P. M. et al. Effects of altered dry season length and plant inputs on soluble soil carbon.  
942 *Ecology* 99, 2348-2362 (2018).

943 338 Guo, Y., Song, C., Tan, W., Wang, X. & Lu, Y. Hydrological processes and permafrost regulate  
944 magnitude, source and chemical characteristics of dissolved organic carbon export in a peatland

catchment of northeastern China. *Hydrology and Earth System Sciences* 22, 1081-1093 (2018).

339 Glina, B., Bogacz, A., Mendyk, Ł., Bojko, O. & Nowak, M. Effectiveness of restoration of a  
degraded shallow mountain fen after five years. (2018).

340 Costa, E. N. D. d., Landim de Souza, M. F., Lima Marrocos, P. C., Lobao, D. & Lopes da Silva,  
D. M. Soil organic matter and CO<sub>2</sub> fluxes in small tropical watersheds under forest and cacao  
agroforestry. *PloS one* 13, e0200550 (2018).

341 Barcellos, D., O'Connell, C. S., Silver, W., Meile, C. & Thompson, A. Hot spots and hot  
moments of soil moisture explain fluctuations in iron and carbon cycling in a humid tropical  
forest soil. *Soil Systems* 2, 59 (2018).

342 Banach-Szott, M., Kondratowicz-Maciejewska, K. & Kobierski, M. Humic substances in  
Fluvisols of the Lower Vistula floodplain, North Poland. *Environmental Science and Pollution  
Research* 25, 23992-24002 (2018).

343 AlMulla, A. A., Jones, D. & Roberts, P. Substrate influences temperature sensitivity of dissolved  
organic carbon (DOC) and nitrogen (DON) mineralization in arid agricultural soils. *Soil  
Systems* 2, 28 (2018).

344 Wang, J., Song, C., Hou, A. & Xi, F. Methane emission potential from freshwater marsh soils of  
Northeast China: response to simulated freezing-thawing cycles. *Wetlands* 37, 437-445 (2017).

345 Wang, C., Tong, C., Chambers, L. G. & Liu, X. Identifying the salinity thresholds that impact  
greenhouse gas production in subtropical tidal freshwater marsh soils. *Wetlands* 37, 559-571  
(2017).

346 Tang, J., Zhang, Y., Zha, Y., Li, X. & Fan, S. Oxalate enhances desorption of perfluorooctane  
sulfonate from soils and sediments. *Water, Air, & Soil Pollution* 228, 1-11 (2017).

347 Sanderman, J. & Kramer, M. G. Dissolved organic matter retention in volcanic soils with  
contrasting mineralogy: a column sorption experiment. *Biogeochemistry* 135, 293-306 (2017).

348 Raudina, T. V. et al. Dissolved organic carbon and major and trace elements in peat porewater of  
sporadic, discontinuous, and continuous permafrost zones of western Siberia. *Biogeosciences* 14,  
3561-3584 (2017).

349 Qiu, J. & Turner, M. G. Effects of non-native Asian earthworm invasion on temperate forest and  
prairie soils in the Midwestern US. *Biological Invasions* 19, 73-88 (2017).

350 Puissant, J. et al. Climate change effects on the stability and chemistry of soil organic carbon  
pools in a subalpine grassland. *Biogeochemistry* 132, 123-139 (2017).

351 Morling, K., Raeke, J., Kamjunke, N., Reemtsma, T. & Tittel, J. Tracing aquatic priming effect  
during microbial decomposition of terrestrial dissolved organic carbon in chemostat experiments.  
*Microbial ecology* 74, 534-549 (2017).

352 McDonald, G. et al. A survey of total and dissolved organic carbon in alkaline soils of southern  
Australia. *Soil Research* 55, 617-629 (2017).

353 Li, Z. et al. Effects of moso bamboo (*Phyllostachys edulis*) invasions on soil nitrogen cycles  
depend on invasion stage and warming. *Environmental Science and Pollution Research* 24,  
24989-24999 (2017).

354 Li, Y., Wang, Y., Xu, S., Hu, B. & Wang, Z.-L. Effects of mariculture and solar-salt production  
on sediment microbial community structure in a coastal wetland. *Journal of Coastal Research* 33,  
573-582 (2017).

355 Jiskra, M., Wiederhold, J. G., Skjellberg, U., Kronberg, R.-M. & Kretzschmar, R. Source tracing  
of natural organic matter bound mercury in boreal forest runoff with mercury stable isotopes.

Environmental Science: Processes & Impacts 19, 1235-1248 (2017).

356 Jiang, X. et al. Colloid-bound and dissolved phosphorus species in topsoil water extracts along a  
grassland transect from Cambisol to Stagnosol. *Biogeosciences* 14, 1153-1164 (2017).

357 Ide, J. i. et al. Spatial variations in the molecular diversity of dissolved organic matter in water  
moving through a boreal forest in eastern Finland. *Scientific reports* 7, 42102 (2017).

358 Cuske, M., Karczewska, A. & Gałka, B. Speciation of Cu, Zn, and Pb in Soil Solutions  
Extracted from Strongly Polluted Soils Treated with Organic Materials. *Polish Journal of  
Environmental Studies* 26 (2017).

359 Conner, L. G., Gill, R. A. & Harvey, J. T. Earlier snowmelt accompanied by warmer soil  
temperatures in mid-latitude aspen forest and subalpine meadow: Implications for soil carbon.  
*Plant and Soil* 417, 275-285 (2017).

360 Cheng, X., Yu, M. & Wang, G. G. Effects of thinning on soil organic carbon fractions and soil  
properties in *Cunninghamia lanceolata* stands in eastern China. *Forests* 8, 198 (2017).

361 Cao, Q. et al. Factors affecting distribution patterns of organic carbon in sediments at regional  
and national scales in China. *Scientific reports* 7, 5497 (2017).

362 Broder, T., Knorr, K.-H. & Biester, H. Changes in dissolved organic matter quality in a peatland  
and forest headwater stream as a function of seasonality and hydrologic conditions. *Hydrology  
and Earth System Sciences* 21, 2035-2051 (2017).

363 Bojko, O. et al. Labile and stabile soil organic carbon fractions in surface horizons of mountain  
soils—relationships with vegetation and altitude. *Journal of Mountain Science* 14, 2391-2405  
(2017).

364 Yuan, H.-Y. et al. Geographic distance and amorphous iron affect the abundance and distribution  
of *Geobacteraceae* in paddy soils in China. *Journal of Soils and Sediments* 16, 2657-2665  
(2016).

365 Yang, C., Wang, Y., Jing, Y. & Li, J. The impact of land use on riparian soil dissolved organic  
matter and on streamwater quality on Chongming Island, China. *Regional Environmental  
Change* 16, 2399-2408 (2016).

366 Wu, H., Xu, X., Duan, C., Li, T. & Cheng, W. Synergistic effects of dissolved organic carbon  
and inorganic nitrogen on methane uptake in forest soils without and with freezing treatment.  
*Scientific Reports* 6, 32555 (2016).

367 Wang, J.-J., Jiao, Y., Rhew, R. C. & Chow, A. T. Haloform formation in coastal wetlands along a  
salinity gradient at South Carolina, United States. *Environmental Chemistry* 13, 745-756 (2016).

368 Vázquez, C. et al. Land use impact on chemical and spectroscopical characteristics of soil  
organic matter in an arid ecosystem. *Environmental Earth Sciences* 75, 1-13 (2016).

369 Thieme, L., Graeber, D., Kaupenjohann, M. & Siemens, J. Fast-freezing with liquid nitrogen  
preserves bulk dissolved organic matter concentrations, but not its composition. *Biogeosciences*  
13, 4697-4705 (2016).

370 Supriatin, S., Weng, L. & Comans, R. N. Selenium-rich dissolved organic matter determines  
selenium uptake in wheat grown on Low-selenium arable land soils. *Plant and Soil* 408, 73-94  
(2016).

371 Rouwane, A., Rabiet, M., Grybos, M., Bernard, G. & Guibaud, G. Effects of NO<sub>3</sub><sup>-</sup> and PO<sub>4</sub><sup>3-</sup>  
on the release of geogenic arsenic and antimony in agricultural wetland soil: a field and  
laboratory approach. *Environmental Science and Pollution Research* 23, 4714-4728 (2016).

372 Ogrinc, N. et al. Inorganic and organic carbon dynamics in forested soils developed on

1033 contrasting geology in Slovenia—A stable isotope approach. *Journal of soils and sediments* 16,  
1034 382-395 (2016).

1035 373 Mo, Q. et al. Reforestation in southern China: revisiting soil N mineralization and nitrification  
1036 after 8 years restoration. *Scientific Reports* 6, 19770 (2016).

1037 374 Ma, W. et al. Stability of soil organic carbon and potential carbon sequestration at eroding and  
1038 deposition sites. *Journal of Soils and Sediments* 16, 1705-1717 (2016).

1039 375 Liao, S. et al. Water, rather than temperature, dominantly impacts how soil fauna affect  
1040 dissolved carbon and nitrogen release from fresh litter during early litter decomposition. *Forests*  
1041 7, 249 (2016).

1042 376 Klimek, B., Chodak, M., Jazwa, M. & Niklińska, M. Functional diversity of soil microbial  
1043 communities in boreal and temperate Scots pine forests. *European Journal of Forest Research*  
1044 135, 731-742 (2016).

1045 377 Karl, A. D., Merwin, I. A., Brown, M. G., Hervieux, R. A. & Heuvel, J. E. V. Under-vine  
1046 management impacts soil properties and leachate composition in a New York State Vineyard.  
1047 *HortScience* 51, 941-949 (2016).

1048 378 Julian, P., Gu, B. & Wright, A. L. Mercury stoichiometric relationships in a subtropical peatland.  
1049 *Water, Air, & Soil Pollution* 227, 1-16 (2016).

1050 379 Jones, T. G., Evans, C. D., Jones, D. L., Hill, P. W. & Freeman, C. Transformations in DOC  
1051 along a source to sea continuum; impacts of photo-degradation, biological processes and mixing.  
1052 *Aquatic Sciences* 78, 433-446 (2016).

1053 380 Joly, F.-X., Fromin, N., Kiikkilä O. & Hätenschwiler, S. Diversity of leaf litter leachates from  
1054 temperate forest trees and its consequences for soil microbial activity. *Biogeochemistry* 129,  
1055 373-388 (2016).

1056 381 Hu, Z. et al. A comparison of methane emissions following rice paddies conversion to crab-fish  
1057 farming wetlands in southeast China. *Environmental Science and Pollution Research* 23,  
1058 1505-1515 (2016).

1059 382 Hofmann, K., Lamprecht, A., Pauli, H. & Illmer, P. Distribution of prokaryotic abundance and  
1060 microbial nutrient cycling across a high-alpine altitudinal gradient in the Austrian Central Alps  
1061 is affected by vegetation, temperature, and soil nutrients. *Microbial ecology* 72, 704-716 (2016).

1062 383 Hanan, E. J., D'Antonio, C. M., Roberts, D. A. & Schimel, J. P. Factors regulating nitrogen  
1063 retention during the early stages of recovery from fire in coastal chaparral ecosystems.  
1064 *Ecosystems* 19, 910-926 (2016).

1065 384 Gómez-Gener, L. et al. When water vanishes: magnitude and regulation of carbon dioxide  
1066 emissions from dry temporary streams. *Ecosystems* 19, 710-723 (2016).

1067 385 Gerschlauer, F. et al. Gross nitrogen turnover of natural and managed tropical ecosystems at Mt.  
1068 Kilimanjaro, Tanzania. *Ecosystems* 19, 1271-1288 (2016).

1069 386 Fuss, C. B. et al. Nitrate and dissolved organic carbon mobilization in response to soil freezing  
1070 variability. *Biogeochemistry* 131, 35-47 (2016).

1071 387 Dunn, C., Jones, T. G., Roberts, S. & Freeman, C. Plant species effects on the carbon storage  
1072 capabilities of a blanket bog complex. *Wetlands* 36, 47-58 (2016).

1073 388 Burger, M., Haden, V. R., Chen, H., Six, J. & Horwath, W. R. Stand age affects emissions of N<sub>2</sub>  
1074 O in flood-irrigated alfalfa: a comparison of field measurements, DNDC model simulations and  
1075 IPCC Tier 1 estimates. *Nutrient Cycling in Agroecosystems* 106, 335-345 (2016).

1076 389 Wei, H. et al. Are variations in heterotrophic soil respiration related to changes in substrate

1077 availability and microbial biomass carbon in the subtropical forests? Scientific Reports 5, 18370  
1078 (2015).

1079 390 Wang, G. et al. Distribution of dissolved organic carbon and KMnO<sub>4</sub>-oxidizable carbon along  
1080 the low-to-high intertidal gradient in a mangrove forest. Journal of Soils and Sediments 15,  
1081 2199-2209 (2015).

1082 391 Tsai, C.-W., Tian, G. & Chiu, C.-Y. Great fraction of dissolved organic C and N in the primary  
1083 per-humid Chamaecyparis forest soil. Botanical Studies 56, 1-9 (2015).

1084 392 Tong, C., Huang, J. & Jia, Y. Small-scale spatial variability of soil methane production potential  
1085 and porewater characteristics in an estuarine Phragmites australis marsh. Journal of Coastal  
1086 Research 31, 994-1004 (2015).

1087 393 Tirado-Corbalán R., Anderson, R. G., Wang, D. & Ayars, J. E. Soil carbon and nitrogen stocks of  
1088 different Hawaiian sugarcane cultivars. Agronomy 5, 239-261 (2015).

1089 394 Rákos, M. & Filep, T. Factors determining Cd, Co, Cr, Cu, Ni, Mn, Pb and Zn mobility in  
1090 uncontaminated arable and forest surface soils in Hungary. Environmental Earth Sciences 74,  
1091 6805-6817 (2015).

1092 395 Pu, X. et al. Responses of soil carbon and nitrogen to successive land use conversion in  
1093 seasonally frozen zones. Plant and soil 387, 117-130 (2015).

1094 396 Liao, S. et al. Soil fauna affects dissolved carbon and nitrogen in foliar litter in alpine forest and  
1095 alpine meadow. Plos one 10, e0139099 (2015).

1096 397 Levia, D. F. et al. Calcium and aluminum cycling in a temperate broadleaved deciduous forest of  
1097 the eastern USA: relative impacts of tree species, canopy state, and flux type. Environmental  
1098 monitoring and assessment 187, 1-13 (2015).

1099 398 KOCINIEWSKA, K. Soil quality assessment of Phaeozems and Luvisols from the Kujawy  
1100 region (central Poland). Soil Science Annual 66, 111-118 (2015).

1101 399 Kaňa, J., Tahovská, K., Kopáček, J. & Šantrůčková, H. Excess of organic carbon in mountain  
1102 spruce forest soils after bark beetle outbreak altered microbial N transformations and mitigated  
1103 N-saturation. PLoS One 10, e0134165 (2015).

1104 400 Chávez-Vergara, B. M., González-Rodríguez, A., Etchevers, J. D., Oyama, K. & García-Oliva, F.  
1105 Foliar nutrient resorption constrains soil nutrient transformations under two native oak species  
1106 in a temperate deciduous forest in Mexico. European Journal of Forest Research 134, 803-817  
1107 (2015).

1108 401 Bradová M. et al. The variations of aluminium species in mountainous forest soils and its  
1109 implications to soil acidification. Environmental Science and Pollution Research 22,  
1110 16676-16687 (2015).

1111 402 Armstrong, A., Waldron, S., Ostle, N. J., Richardson, H. & Whitaker, J. Biotic and abiotic  
1112 factors interact to regulate northern peatland carbon cycling. Ecosystems 18, 1395-1409 (2015).

1113 403 Zhang, S. et al. Changes in pH, dissolved organic matter and Cd species in the rhizosphere soils  
1114 of Cd phytostabilizer *Athyrium wardii* (Hook.) Makino involved in Cd tolerance and  
1115 accumulation. Environmental Science and Pollution Research 21, 4605-4613 (2014).

1116 404 Yuan, J., Ding, W., Liu, D., Xiang, J. & Lin, Y. Methane production potential and methanogenic  
1117 archaea community dynamics along the *Spartina alterniflora* invasion chronosequence in a  
1118 coastal salt marsh. Applied microbiology and biotechnology 98, 1817-1829 (2014).

1119 405 Ukonmaanaho, L., Starr, M., Lindroos, A.-J. & Nieminen, T. M. Long-term changes in acidity  
1120 and DOC in throughfall and soil water in Finnish forests. Environmental monitoring and

assessment 186, 7733-7752 (2014).

406 Tiemeyer, B. & Kahle, P. Nitrogen and dissolved organic carbon (DOC) losses from an  
artificially drained grassland on organic soils. *Biogeosciences* 11, 4123-4137 (2014).

407 Scheibe, A. & Gleixner, G. Influence of litter diversity on dissolved organic matter release and  
soil carbon formation in a mixed beech forest. *PloS one* 9, e114040 (2014).

408 Ohno, T. et al. Molecular composition and biodegradability of soil organic matter: a case study  
comparing two new England forest types. *Environmental science & technology* 48, 7229-7236  
(2014).

409 Liu, T.-Z., Liu, C.-Q., Lang, Y.-C. & Ding, H. Dissolved organic carbon and its carbon isotope  
compositions in hill slope soils of the karst area of southwest China: Implications for carbon  
dynamics in limestone soil. *Geochemical Journal* 48, 277-285 (2014).

410 Liu, D., Ding, W., Yuan, J., Xiang, J. & Lin, Y. Substrate and/or substrate-driven changes in the  
abundance of methanogenic archaea cause seasonal variation of methane production potential in  
species-specific freshwater wetlands. *Applied microbiology and biotechnology* 98, 4711-4721  
(2014).

411 He, D. & Ruan, H. Long term effect of land reclamation from lake on chemical composition of  
soil organic matter and its mineralization. *Plos one* 9, e99251 (2014).

412 Gao, J., Zhang, X., Lei, G. & Wang, G. Soil organic carbon and its fractions in relation to  
degradation and restoration of wetlands on the Zoigê Plateau, China. *Wetlands* 34, 235-241  
(2014).

413 Franchini, A. G., Erny, I. & Zeyer, J. Spatial variability of methane emissions from Swiss alpine  
fens. *Wetlands ecology and management* 22, 383-397 (2014).

414 Fink, J. R. et al. Chemical and mineralogical changes in a Brazilian Rhodic Paleudult under  
different land use and managements. *Revista Brasileira de Ciência do Solo* 38, 1304-1314  
(2014).

415 Ding, Y., Cawley, K. M., Da Cunha, C. N. & Jaffé R. Environmental dynamics of dissolved  
black carbon in wetlands. *Biogeochemistry* 119, 259-273 (2014).

416 Lim Kim Choo, L. N. & Ahmed, O. H. Partitioning carbon dioxide emission and assessing  
dissolved organic carbon leaching of a drained peatland cultivated with pineapple at Saratok,  
Malaysia. *The Scientific World Journal* 2014, 906021 (2014).

417 Bhadha, J. H., Lang, T. A. & Daroub, S. H. Seasonal delivery of organic matter and metals to  
farm canals: effect on sediment phosphorus storage capacity. *Journal of soils and sediments* 14,  
991-1003 (2014).

418 Xu, J., Yang, S., Peng, S., Wei, Q. & Gao, X. Solubility and leaching risks of organic carbon in  
paddy soils as affected by irrigation managements. *The Scientific World Journal* 2013, 546750  
(2013).

419 Wei, S. & Twardowska, I. Main rhizosphere characteristics of the Cd hyperaccumulator *Rorippa*  
*globosa* (Turcz.) Thell. *Plant and soil* 372, 669-681 (2013).

420 Wang, F. et al. Seedling growth and soil nutrient availability in exotic and native tree species:  
implications for afforestation in southern China. *Plant and Soil* 364, 207-218 (2013).

421 Salek-Gilani, S., Raiesi, F., Tahmasebi, P. & Ghorbani, N. Soil organic matter in restored  
rangelands following cessation of rainfed cropping in a mountainous semi-arid landscape.  
*Nutrient cycling in agroecosystems* 96, 215-232 (2013).

422 Marañón-Jiménez, S. & Castro, J. Effect of decomposing post-fire coarse woody debris on soil

1165 fertility and nutrient availability in a Mediterranean ecosystem. *Biogeochemistry* 112, 519-535  
1166 (2013).

1167 423 Knorr, K.-H. DOC-dynamics in a small headwater catchment as driven by redox fluctuations  
1168 and hydrological flow paths—are DOC exports mediated by iron reduction/oxidation cycles?  
1169 *Biogeosciences* 10, 891-904 (2013).

1170 424 Huang, W. et al. Dissolved organic carbon in headwater streams and riparian soil organic carbon  
1171 along an altitudinal gradient in the Wuyi Mountains, China. *PLoS One* 8, e78973 (2013).

1172 425 Farrell, M. et al. Oligopeptides represent a preferred source of organic N uptake: a global  
1173 phenomenon? *Ecosystems* 16, 133-145 (2013).

1174 426 De Marco, A., Arena, C., Giordano, M. & Virzo De Santo, A. Impact of the invasive tree black  
1175 locust on soil properties of Mediterranean stone pine-holm oak forests. *Plant and soil* 372,  
1176 473-486 (2013).

1177 427 Bolan, N., Kunhikrishnan, A. & Gibbs, J. Rhizoreduction of arsenate and chromate in Australian  
1178 native grass, shrub and tree vegetation. *Plant and soil* 367, 615-625 (2013).

1179 428 Bi, R., Lu, Q., Yu, W., Yuan, Y. & Zhou, S. Electron transfer capacity of soil dissolved organic  
1180 matter and its potential impact on soil respiration. *Journal of Soils and Sediments* 13, 1553-1560  
1181 (2013).

1182 429 Bhattacharyya, P. et al. Net ecosystem CO<sub>2</sub> exchange and carbon cycling in tropical lowland  
1183 flooded rice ecosystem. *Nutrient cycling in agroecosystems* 95, 133-144 (2013).

1184 430 Yang, Y. et al. Dissolved organic carbon in association with water soluble nutrients and metals in  
1185 soils from Lake Okeechobee Watershed, South Florida. *Water, Air, & Soil Pollution* 223,  
1186 4075-4088 (2012).

1187 431 Wang, A. et al. Abundance and composition dynamics of soil ammonia-oxidizing archaea in an  
1188 alpine fir forest on the eastern Tibetan Plateau of China. *Canadian Journal of Microbiology* 58,  
1189 572-580 (2012).

1190 432 Qi, Y. et al. Effects of a conversion from grassland to cropland on the different soil organic  
1191 carbon fractions in Inner Mongolia, China. *Journal of Geographical Sciences* 22, 315-328  
1192 (2012).

1193 433 Liebner, S., Schwarzenbach, S. P. & Zeyer, J. Methane emissions from an alpine fen in central  
1194 Switzerland. *Biogeochemistry* 109, 287-299 (2012).

1195 434 Hossain, M. et al. Spatial heterogeneity and kinetic regulation of arsenic dynamics in mangrove  
1196 sediments: the Sundarbans, Bangladesh. *Environmental science & technology* 46, 8645-8652  
1197 (2012).

1198 435 Ginzburg, O. & Steinberger, Y. Effects of forest wildfire on soil microbial-community activity  
1199 and chemical components on a temporal-seasonal scale. *Plant and soil* 360, 243-257 (2012).

1200 436 Fasching, C. & Battin, T. J. Exposure of dissolved organic matter to UV-radiation increases  
1201 bacterial growth efficiency in a clear-water Alpine stream and its adjacent groundwater. *Aquatic*  
1202 *Sciences* 74, 143-153 (2012).

1203 437 Tu, C.-L., Liu, C.-Q., Lu, X.-H., Yuan, J. & Lang, Y.-C. Sources of dissolved organic carbon in  
1204 forest soils: evidences from the differences of organic carbon concentration and isotope  
1205 composition studies. *Environmental Earth Sciences* 63, 723-730 (2011).

1206 438 Senga, Y. et al. Vertical profiles of DIN, DOC, and microbial activities in the wetland soil of  
1207 Kushiro Mire, northeastern Japan. *Limnology* 12, 17-23 (2011).

1208 439 Löffgren, S. et al. Recovery of soil water, groundwater, and streamwater from acidification at the

1209 Swedish Integrated Monitoring catchments. *Ambio* 40, 836-856 (2011).

1210 440 Liu, D., Ding, W., Jia, Z. & Cai, Z. Relation between methanogenic archaea and methane  
1211 production potential in selected natural wetland ecosystems across China. *Biogeosciences* 8,  
1212 329-338 (2011).

1213 441 Kunhikrishnan, A., Bolan, N. S. & Naidu, R. Phytoavailability of copper in the presence of  
1214 recycled water sources. *Plant and soil* 348, 425-438 (2011).

1215 442 Hur, J. Microbial changes in selected operational descriptors of dissolved organic matters from  
1216 various sources in a watershed. *Water, Air, & Soil Pollution* 215, 465-476 (2011).

1217 443 Groffman, P. M. et al. Snow depth, soil freezing and nitrogen cycling in a northern hardwood  
1218 forest landscape. *Biogeochemistry* 102, 223-238 (2011).

1219 444 B árcenas-Moreno, G., Garc á-Orenes, F., Mataix-Solera, J., Mataix-Beneyto, J. & B áãh, E. Soil  
1220 microbial recolonisation after a fire in a Mediterranean forest. *Biology and Fertility of soils* 47,  
1221 261-272 (2011).

1222 445 Yu, X., Zhang, Y., Zhao, H., Lu, X. & Wang, G. Freeze-thaw effects on sorption/desorption of  
1223 dissolved organic carbon in wetland soils. *Chinese Geographical Science* 20, 209-217 (2010).

1224 446 Wu, Y., Clarke, N. & Mulder, J. Dissolved organic nitrogen concentrations and ratios of  
1225 dissolved organic carbon to dissolved organic nitrogen in throughfall and soil waters in Norway  
1226 spruce and Scots pine forest stands throughout Norway. *Water, Air, & Soil Pollution* 210,  
1227 171-186 (2010).

1228 447 Tejneck ý, V. et al. Seasonal variation of water extractable aluminium forms in acidified forest  
1229 organic soils under different vegetation cover. *Biogeochemistry* 101, 151-163 (2010).

1230 448 Schmidt, B. H., Wang, C.-P., Chang, S.-C. & Matzner, E. High precipitation causes large fluxes  
1231 of dissolved organic carbon and nitrogen in a subtropical montane *Chamaecyparis* forest in  
1232 Taiwan. *Biogeochemistry* 101, 243-256 (2010).

1233 449 Roux-Michollet, D., Dudal, Y., Jocteur-Monrozier, L. & Czarnes, S. Steam treatment of surface  
1234 soil: how does it affect water-soluble organic matter, C mineralization, and bacterial community  
1235 composition? *Biology and fertility of soils* 46, 607-616 (2010).

1236 450 Oyanagi, N. & Nakata, M. Dynamics of dissolved ions in the soil of abandoned terraced paddy  
1237 fields in Sado Island, Japan. *Paddy and Water Environment* 8, 121-129 (2010).

1238 451 Cloutier-Hurteau, B., Turmel, M.-C., Sauv é S. & Courchesne, F. The speciation of  
1239 water-soluble Al and Zn in the rhizosphere of forest soils. *Journal of Environmental Monitoring*  
1240 12, 1274-1286 (2010).

1241 452 Chu, H. & Grogan, P. Soil microbial biomass, nutrient availability and nitrogen mineralization  
1242 potential among vegetation-types in a low arctic tundra landscape. *Plant and soil* 329, 411-420  
1243 (2010).

1244 453 Chen, D., Zhang, Y., Lin, Y., Zhu, W. & Fu, S. Changes in belowground carbon in *Acacia*  
1245 *crassicarpa* and *Eucalyptus urophylla* plantations after tree girdling. *Plant and Soil* 326, 123-135  
1246 (2010).

1247 454 Zacccone, C., D'Orazio, V., Shotyk, W. & Miano, T. M. Chemical and spectroscopic  
1248 investigation of porewater and aqueous extracts of corresponding peat samples throughout a bog  
1249 core (Jura Mountains, Switzerland). *Journal of Soils and Sediments* 9, 443-456 (2009).

1250 455 Xu, X. & Kazuyuki, I. Soil acidification stimulates the emission of ethylene from temperate  
1251 forest soils. *Advances in Atmospheric Sciences* 26, 1253-1261 (2009).

1252 456 Stutter, M. I., Langan, S. J. & Lumsdon, D. G. Vegetated buffer strips can lead to increased

1253 release of phosphorus to waters: a biogeochemical assessment of the mechanisms.  
1254 Environmental science & technology 43, 1858-1863 (2009).

1255 457 Sleutel, S. et al. Patterns of dissolved organic carbon and nitrogen fluxes in deciduous and  
1256 coniferous forests under historic high nitrogen deposition. Biogeosciences 6, 2743-2758 (2009).

1257 458 Roberts, P., Newsham, K. K., Bardgett, R. D., Farrar, J. F. & Jones, D. L. Vegetation cover  
1258 regulates the quantity, quality and temporal dynamics of dissolved organic carbon and nitrogen  
1259 in Antarctic soils. Polar Biology 32, 999-1008 (2009).

1260 459 Fujii, K., Funakawa, S., Hayakawa, C., Sukartiningih & Kosaki, T. Quantification of proton  
1261 budgets in soils of cropland and adjacent forest in Thailand and Indonesia. Plant and Soil 316,  
1262 241-255 (2009).

1263 460 Aanderud, Z. T. & Richards, J. H. Hydraulic redistribution may stimulate decomposition.  
1264 Biogeochemistry 95, 323-333 (2009).

1265 461 Prokushkin, A., Tokareva, I., Prokushkin, S., Abaimov, A. & Guggenberger, H. Fluxes of  
1266 dissolved organic matter in larch forests in the cryolithozone of central Siberia. Russian Journal  
1267 of Ecology 39, 151-159 (2008).

1268 462 Menyailo, O. The effect of afforestation on mineralization of soil organic matter. Russian  
1269 Journal of Ecology 39, 21-25 (2008).

1270 463 Fiedler, S. et al. Particulate organic carbon (POC) in relation to other pore water carbon  
1271 fractions in drained and rewetted fens in Southern Germany. Biogeosciences 5, 1615-1623  
1272 (2008).

1273 464 Fellman, J. B., D'Amore, D. V., Hood, E. & Boone, R. D. Fluorescence characteristics and  
1274 biodegradability of dissolved organic matter in forest and wetland soils from coastal temperate  
1275 watersheds in southeast Alaska. Biogeochemistry 88, 169-184 (2008).

1276 465 Åkerblom, S. et al. Partitioning of Hg between solid and dissolved organic matter in the humus  
1277 layer of boreal forests. Water, air, and soil pollution 189, 239-252 (2008).

1278 466 Zambrosi, F. C. B., Alleoni, L. R. F. & Caires, E. F. Nutrient concentration in soil water extracts  
1279 and soybean nutrition in response to lime and gypsum applications to an acid Oxisol under  
1280 no-till system. Nutrient Cycling in Agroecosystems 79, 169-179 (2007).

1281 467 Zalamea, M., González, G., Ping, C.-L. & Michaelson, G. Soil organic matter dynamics under  
1282 decaying wood in a subtropical wet forest: effect of tree species and decay stage. Plant and Soil  
1283 296, 173-185 (2007).

1284 468 Wickland, K. P., Neff, J. C. & Aiken, G. R. Dissolved organic carbon in Alaskan boreal forest:  
1285 Sources, chemical characteristics, and biodegradability. Ecosystems 10, 1323-1340 (2007).

1286 469 Ward, S. E., Bardgett, R. D., McNamara, N. P., Adamson, J. K. & Ostle, N. J. Long-term  
1287 consequences of grazing and burning on northern peatland carbon dynamics. Ecosystems 10,  
1288 1069-1083 (2007).

1289 470 Vink, S., Ford, P., Bormans, M., Kelly, C. & Turley, C. Contrasting nutrient exports from a  
1290 forested and an agricultural catchment in south-eastern Australia. Biogeochemistry 84, 247-264  
1291 (2007).

1292 471 Peichl, M. et al. Concentrations and fluxes of dissolved organic carbon in an age-sequence of  
1293 white pine forests in Southern Ontario, Canada. Biogeochemistry 86, 1-17 (2007).

1294 472 Park, J.-H., Day, T. A., Strauss, S. & Ruhland, C. T. Biogeochemical pools and fluxes of carbon  
1295 and nitrogen in a maritime tundra near penguin colonies along the Antarctic Peninsula. Polar  
1296 Biology 30, 199-207 (2007).

- 1297 473 Pampura, T., Groenenberg, J., Lofts, S. & Pripulina, I. Validation of transfer functions predicting  
1298 Cd and Pb free metal ion activity in soil solution as a function of soil characteristics and reactive  
1299 metal content. *Water, air, and soil pollution* 184, 217-234 (2007).
- 1300 474 Ngao, J., Longdoz, B., Granier, A. & Epron, D. Estimation of autotrophic and heterotrophic  
1301 components of soil respiration by trenching is sensitive to corrections for root decomposition  
1302 and changes in soil water content. *Plant and soil* 301, 99-110 (2007).
- 1303 475 Montañó, N. M., García-Oliva, F. & Jaramillo, V. J. Dissolved organic carbon affects soil  
1304 microbial activity and nitrogen dynamics in a Mexican tropical deciduous forest. *Plant and Soil*  
1305 295, 265-277 (2007).
- 1306 476 McGee, G. G., Mitchell, M. J., Leopold, D. J. & Raynal, D. J. Comparison of soil nutrient fluxes  
1307 from tree-fall gap zones of an old-growth northern hardwood forest<sup>1</sup>. *The Journal of the Torrey*  
1308 *Botanical Society* 134, 269-280 (2007).
- 1309 477 Giesler, R. et al. Production of dissolved organic carbon and low-molecular weight organic acids  
1310 in soil solution driven by recent tree photosynthate. *Biogeochemistry* 84, 1-12 (2007).
- 1311 478 Vinther, F. P., Hansen, E. M. & Eriksen, J. Leaching of soil organic carbon and nitrogen in sandy  
1312 soils after cultivating grass-clover swards. *Biology and Fertility of Soils* 43, 12-19 (2006).
- 1313 479 Tao, S., Xu, F., Liu, W., Cui, Y. & Coveney, R. M. A chemical extraction method for mimicking  
1314 bioavailability of polycyclic aromatic hydrocarbons to wheat grown in soils containing various  
1315 amounts of organic matter. *Environmental science & technology* 40, 2219-2224 (2006).
- 1316 480 Marchand, C., Albéric, P., Lallier-Vergès, E. & Baltzer, F. Distribution and characteristics of  
1317 dissolved organic matter in mangrove sediment pore waters along the coastline of French  
1318 Guiana. *Biogeochemistry* 81, 59-75 (2006).
- 1319 481 Lee, R. Y. & Joye, S. B. Seasonal patterns of nitrogen fixation and denitrification in oceanic  
1320 mangrove habitats. *Marine Ecology Progress Series* 307, 127-141 (2006).
- 1321 482 Jones, D. L. & Willett, V. B. Experimental evaluation of methods to quantify dissolved organic  
1322 nitrogen (DON) and dissolved organic carbon (DOC) in soil. *Soil Biology and biochemistry* 38,  
1323 991-999 (2006).
- 1324 483 Fröberg, M., Berggren, D., Bergkvist, B., Bryant, C. & Mulder, J. Concentration and fluxes of  
1325 dissolved organic carbon (DOC) in three Norway spruce stands along a climatic gradient in  
1326 Sweden. *Biogeochemistry* 77, 1-23 (2006).
- 1327 484 Brenner, R. E., Boone, R. D., Jones, J. B., Lajtha, K. & Ruess, R. W. Successional and physical  
1328 controls on the retention of nitrogen in an undisturbed boreal forest ecosystem. *Oecologia* 148,  
1329 602-611 (2006).
- 1330 485 Asano, Y., Compton, J. E. & Church, M. R. Hydrologic flowpaths influence inorganic and  
1331 organic nutrient leaching in a forest soil. *Biogeochemistry* 81, 191-204 (2006).
- 1332 486 Aitkenhead-Peterson, J. A. et al. Linking foliar chemistry to forest floor solid and solution phase  
1333 organic C and N in *Picea abies* [L.] Karst stands in northern Bohemia. *Plant and soil* 283,  
1334 187-201 (2006).
- 1335 487 Weintraub, M. N. & Schimel, J. P. The seasonal dynamics of amino acids and other nutrients in  
1336 Alaskan Arctic tundra soils. *Biogeochemistry* 73, 359-380 (2005).
- 1337 488 Schwendenmann, L. & Veldkamp, E. The role of dissolved organic carbon, dissolved organic  
1338 nitrogen, and dissolved inorganic nitrogen in a tropical wet forest ecosystem. *Ecosystems* 8,  
1339 339-351 (2005).
- 1340 489 Schulze, W. X. et al. A proteomic fingerprint of dissolved organic carbon and of soil particles.

- 1341 Oecologia 142, 335-343 (2005).
- 1342 490 Opsahl, S. P. Organic carbon composition and oxygen metabolism across a gradient of  
1343 seasonally inundated limesink and riparian wetlands in the southeast Coastal Plain, USA.  
1344 Biogeochemistry 76, 47-68 (2005).
- 1345 491 Kaiser, K. & Guggenberger, G. Dissolved organic sulphur in soil water under *Pinus sylvestris* L.  
1346 and *Fagus sylvatica* L. stands in northeastern Bavaria, Germany variations with seasons and soil  
1347 depth. Biogeochemistry 72, 337-364 (2005).
- 1348 492 Fräberg, M., Kleja, D. B., Bergkvist, B., Tipping, E. & Mulder, J. Dissolved organic carbon  
1349 leaching from a coniferous forest floor--a field manipulation experiment. Biogeochemistry 75,  
1350 271-287 (2005).
- 1351 493 Fang, C. & Moncrieff, J. B. The variation of soil microbial respiration with depth in relation to  
1352 soil carbon composition. Plant and Soil 268, 243-253 (2005).
- 1353 494 Lu, Y., Watanabe, A. & Kimura, M. Contribution of plant photosynthates to dissolved organic  
1354 carbon in a flooded rice soil. Biogeochemistry 71, 1-15 (2004).
- 1355 495 Cory, R., Green, S. & Pregitzer, K. Dissolved organic matter concentration and composition in  
1356 the forests and streams of Olympic National Park, WA. Biogeochemistry 67, 269-288 (2004).
- 1357 496 Ciglasch, H., Lilienfein, J., Kaiser, K. & Wilcke, W. Dissolved organic matter under native  
1358 Cerrado and *Pinus caribaea* plantations in the Brazilian savanna. Biogeochemistry 67, 157-182  
1359 (2004).
- 1360 497 Bohlen, P. J., Pelletier, D. M., Groffman, P. M., Fahey, T. J. & Fisk, M. C. Influence of  
1361 earthworm invasion on redistribution and retention of soil carbon and nitrogen in northern  
1362 temperate forests. Ecosystems 7, 13-27 (2004).
- 1363 498 Lindroos, A.-J., Brügger, T., Derome, J. & Derome, K. The weathering of mineral soil by natural  
1364 soil solutions. Water, Air, and Soil Pollution 149, 269-279 (2003).
- 1365 499 Yu, Z. et al. Contribution of amino compounds to dissolved organic nitrogen in forest soils.  
1366 Biogeochemistry 61, 173-198 (2002).
- 1367 500 Ross, D. et al. Afforestation of pastures with *Pinus radiata* influences soil carbon and nitrogen  
1368 pools and mineralisation and microbial properties. Soil Research 40, 1303-1318 (2002).
- 1369 501 Qualls, R., Haines, B., Swank, W. & Tyler, S. Retention of soluble organic nutrients by a  
1370 forested ecosystem. Biogeochemistry 61, 135-171 (2002).
- 1371 502 Menyailo, O. V., Hungate, B. A. & Zech, W. Tree species mediated soil chemical changes in a  
1372 Siberian artificial afforestation experiment. Plant and Soil 242, 171-182 (2002).
- 1373 503 Jacinthe, P.-A., Dick, W. & Owens, L. Overwinter soil denitrification activity and mineral  
1374 nitrogen pools as affected by management practices. Biology and fertility of soils 36, 1-9  
1375 (2002).
- 1376 504 Solinger, S., Kalbitz, K. & Matzner, E. Controls on the dynamics of dissolved organic carbon  
1377 and nitrogen in a Central European deciduous forest. Biogeochemistry 55, 327-349 (2001).
- 1378 505 Ross, D. J., Scott, N. A., Tate, K. R., Rodda, N. J. & Townsend, J. A. Root effects on soil carbon  
1379 and nitrogen cycling in a *Pinus radiata* D. Don plantation on a coastal sand. Soil Research 39,  
1380 1027-1039 (2001).
- 1381 506 Fitzhugh, R. D. et al. Effects of soil freezing disturbance on soil solution nitrogen, phosphorus,  
1382 and carbon chemistry in a northern hardwood ecosystem. Biogeochemistry 56, 215-238 (2001).
- 1383 507 Zeller, V., Bahn, M., Aichner, M. & Tappeiner, U. Impact of land-use change on nitrogen  
1384 mineralization in subalpine grasslands in the Southern Alps. Biology and Fertility of Soils 31,

1385 441-448 (2000).

1386 508 McDowell, W. H. Internal nutrient fluxes in a Puerto Rican rain forest. *Journal of Tropical*  
1387 *Ecology* 14, 521-536 (1998).

1388 509 Johnson, C. E., Driscoll, C. T., Siccama, T. G. & Likens, G. E. Element fluxes and landscape  
1389 position in a northern hardwood forest watershed ecosystem. *Ecosystems* 3, 159-184 (2000).

1390 510 Markewitz, D. & Richter, D. D. The bio in aluminum and silicon geochemistry.  
1391 *Biogeochemistry* 42, 235-252 (1998).

1392 511 Zabowski, D., Rygiewicz, P. & Skinner, M. Site disturbance effects on a clay soil under radiata  
1393 pine: I. Soil solutions and clay mineral stability. *Plant and soil* 186, 343-351 (1996).

1394 512 Dai, K. O. H., David, M. B. & Vance, G. F. Characterization of solid and dissolved carbon in a  
1395 spruce-fir Spodosol. *Biogeochemistry* 35, 339-365 (1996).

1396 513 Schaaf, W. Effects of Mg (OH) 2-fertilization on nutrient cycling in a heavily damaged Norway  
1397 spruce ecosystem (NE Bavaria/FRG). *Plant and Soil* 168, 505-511 (1995).

1398 514 贾韦德. Impacts of Different Land Uses on Carbon Fluxes from Subtropical Soils in Central  
1399 China: Implications for Carbon Sequestration, 华中农业大学, (2009).

1400 515 Zhao, R., He, M., Jiang, C. & Liu, F. Soil microbial stoichiometry and community structure  
1401 responses to long-term natural forest conversion to plantations in a subtropical region.  
1402 *Environmental Science and Pollution Research* 29, 27560-27570 (2022).

1403 516 Zhang, L. et al. Alpine meadow degradation depresses soil nitrogen fixation by regulating plant  
1404 functional groups and diazotrophic community composition. *Plant and Soil*, 1-17 (2022).

1405 517 Yang, R. et al. The content, composition, and influencing factors of organic carbon in the  
1406 sediments of two types of constructed wetlands. *Environmental Science and Pollution Research*  
1407 28, 49206-49219 (2021).

1408 518 Yang, H., Xie, Y., Zhu, T. & Zhou, M. Reduced organic carbon content during the evolvement of  
1409 calcareous soils in karst region. *Forests* 12, 221 (2021).

1410 519 Xiao, Y., Huang, Z., Li, Y., Ling, Y. & Xiao, H. Dynamics variation of soil labile organic carbon  
1411 fractions in different wetland types of dongting lake under seasonal water level fluctuation.  
1412 *Sustainability* 13, 13836 (2021).

1413 520 Shannon, V., Vanguelova, E., Morison, J., Shaw, L. & Clark, J. The contribution of deadwood to  
1414 soil carbon dynamics in contrasting temperate forest ecosystems. *European Journal of Forest*  
1415 *Research* 141, 241-252 (2022).

1416 521 Na, M., Sun, X., Zhang, Y., Sun, Z. & Rousk, J. Higher stand densities can promote soil carbon  
1417 storage after conversion of temperate mixed natural forests to larch plantations. *European*  
1418 *Journal of Forest Research* 140, 373-386 (2021).

1419 522 Lynn, T. M. et al. Effect of land use on soil properties, microbial abundance and diversity of four  
1420 different crop lands in central Myanmar. *3 Biotech* 11, 154 (2021).

1421 523 Liu, T., Peng, D., Tan, Z., Guo, J. & Zhang, Y. Effects of stand density on soil respiration and  
1422 labile organic carbon in different aged *Larix principis-rupprechtii* plantations. *Ecological*  
1423 *Processes* 10, 1-15 (2021).

1424 524 Liu, M., Li, P., Liu, M., Wang, J. & Chang, Q. The trend of soil organic carbon fractions related  
1425 to the successions of different vegetation types on the tableland of the Loess Plateau of China.  
1426 *Journal of Soils and Sediments* 21, 203-214 (2021).

1427 525 Kurganova, I., Telesnina, V., Lopes de Gerenyu, V., Lichko, V. & Karavanova, E. The dynamics  
1428 of carbon pools and biological activity of retic albic podzols in southern taiga during the

1429 postagrogenic evolution. *Eurasian Soil Science* 54, 337-351 (2021).

1430 526 Fan, S. et al. Variations in soil enzyme activities and microbial communities along an altitudinal  
1431 gradient on the eastern Qinghai–Tibetan plateau. *Forests* 12, 681 (2021).

1432 527 Čapek, P., Kasanke, C. P., Starke, R., Zhao, Q. & Tahovská, K. Biochemical inhibition of acid  
1433 phosphatase activity in two mountain spruce forest soils. *Biology and Fertility of Soils* 57,  
1434 991-1005 (2021).

1435 528 Xiao, S. et al. Soil organic carbon sequestration and active carbon component changes following  
1436 different vegetation restoration ages on severely eroded red soils in subtropical China. *Forests*  
1437 11, 1304 (2020).

1438 529 Xu, Z. et al. Plant functional traits determine latitudinal variations in soil microbial function:  
1439 evidence from forests in China. *Biogeosciences* 16, 3333-3349 (2019).

1440 530 Hui-Juan, X. et al. Relative importance of urban and non-urban land-use types for potential  
1441 denitrification derived N<sub>2</sub>O: insights from a regional study. *Earth and Environmental Science*  
1442 *Transactions of the Royal Society of Edinburgh* 109, 453-460 (2018).

1443 531 Sokołowska, J., Józefowska, A., Woźnica, K. & Zaleski, T. Interrelationship between soil depth  
1444 and soil properties of Pieniny National Park forest (Poland). *Journal of Mountain Science* 16,  
1445 1534-1545 (2019).

1446 532 Gerzabek, M. H. et al. Agriculture changes soil properties on the Galápagos Islands—two case  
1447 studies. *Soil Research* 57, 201-214 (2019).

1448 533 Wei, H. et al. Variation in soil methane fluxes and comparison between two forests in China.  
1449 *Forests* 9, 204 (2018).

1450 534 Huo, L. et al. Effect of wetland reclamation on soil organic carbon stability in peat mire soil  
1451 around Xingkai Lake in Northeast China. *Chinese Geographical Science* 28, 325-336 (2018).

1452 535 Jiang, Q., Xu, Z., Hao, Y. & Dong, H. Dynamics of soil labile carbon and nitrogen pools in  
1453 riparian zone of Wyaralong Dam in Southeast Queensland, Australia. *Journal of Soils and*  
1454 *Sediments* 17, 1030-1044 (2017).

1455 536 Che, R. et al. Increase in ammonia-oxidizing microbe abundance during degradation of alpine  
1456 meadows may lead to greater soil nitrogen loss. *Biogeochemistry* 136, 341-352 (2017).

1457 537 Bonnett, S. A. F., Maltby, E. & Freeman, C. Hydrological legacy determines the type of enzyme  
1458 inhibition in a peatlands chronosequence. *Scientific Reports* 7, 9948 (2017).

1459 538 Song, H. et al. Changing roles of ammonia-oxidizing bacteria and archaea in a continuously  
1460 acidifying soil caused by over-fertilization with nitrogen. *Environmental Science and Pollution*  
1461 *Research* 23, 11964-11974 (2016).

1462 539 Gao, S.-J. et al. Spectroscopic characteristics of dissolved organic matter in afforestation forest  
1463 soil of Miyun District, Beijing. *Journal of analytical methods in chemistry* 2016, 1480857  
1464 (2016).

1465 540 Jia, G.-M., Zhang, B.-L., Niu, J.-T., Wang, L.-M. & Chen, F.-Q. Soil labile organic carbon  
1466 fractions in rhizosphere soil in citrus plantations in the Three Gorges Reservoir Area.  
1467 *Agroforestry systems* 89, 1097-1105 (2015).

1468 541 Cusack, D. F., Lee, J. K., McCleery, T. L. & LeCroy, C. S. Exotic grasses and nitrate enrichment  
1469 alter soil carbon cycling along an urban–rural tropical forest gradient. *Global change biology* 21,  
1470 4481-4496 (2015).

1471 542 Wang, Q., Xiao, F., Zhang, F. & Wang, S. Labile soil organic carbon and microbial activity in  
1472 three subtropical plantations. *Forestry* 86, 569-574 (2013).

1473 543 Almagro, M., Querejeta, J. I., Boix-Fayos, C. & Martínez-Mena, M. Links between vegetation  
1474 patterns, soil C and N pools and respiration rate under three different land uses in a dry  
1475 Mediterranean ecosystem. *Journal of Soils and Sediments* 13, 641-653 (2013).

1476 544 Song, Y. et al. Changes in labile organic carbon fractions and soil enzyme activities after  
1477 marshland reclamation and restoration in the Sanjiang Plain in Northeast China. *Environmental*  
1478 *management* 50, 418-426 (2012).

1479 545 Potthast, K., Hamer, U. & Makeschin, F. Land-use change in a tropical mountain rainforest  
1480 region of southern Ecuador affects soil microorganisms and nutrient cycling. *Biogeochemistry*  
1481 111, 151-167 (2012).

1482 546 Zhang, G. Changes of soil labile organic carbon in different land uses in Sanjiang Plain,  
1483 Heilongjiang Province. *Chinese Geographical Science* 20, 139-143 (2010).

1484 547 Schütz, K., Kandeler, E., Nagel, P., Scheu, S. & Ruess, L. Functional microbial community  
1485 response to nutrient pulses by artificial groundwater recharge practice in surface soils and  
1486 subsoils. *FEMS microbiology ecology* 72, 445-455 (2010).

1487 548 Bárta, J., Melichová, T., Vaněk, D., Pícek, T. & Šantrůčková, H. Effect of pH and dissolved  
1488 organic matter on the abundance of nirK and nirS denitrifiers in spruce forest soil.  
1489 *Biogeochemistry* 101, 123-132 (2010).

1490 549 Montaña, N. M., Sandoval-Pérez, A. L., García-Oliva, F., Larsen, J. & Gavito, M. E. Microbial  
1491 activity in contrasting conditions of soil C and N availability in a tropical dry forest. *Journal of*  
1492 *tropical ecology* 25, 401-413 (2009).

1493 550 Zou, J. & Osborne, B. Spatially related sampling uncertainty in the assessment of labile soil  
1494 carbon and nitrogen in an Irish forest plantation. *Applied Sciences* 11, 2139 (2021).

1495 551 Zhang, X. et al. Soil profile rather than reclamation time drives the mudflat soil microbial  
1496 community in the wheat-maize rotation system of Nantong, China. *Journal of Soils and*  
1497 *Sediments* 21, 1672-1687 (2021).

1498 552 Zhang, W. et al. Soil water content, carbon, and nitrogen determine the abundances of  
1499 methanogens, methanotrophs, and methane emission in the Zoige alpine wetland. *Journal of*  
1500 *Soils and Sediments*, 1-12 (2022).

1501 553 Wan Mohd Zamri, W. M. I. et al. Assessment of Aqueous Extraction Methods on Extractable  
1502 Organic Matter and Hydrophobic/Hydrophilic Fractions of Virgin Forest Soils. *Molecules* 26,  
1503 2480 (2021).

1504 554 Yao, L. et al. Variations of soil organic matters and plant cuticular waxes along an altitude  
1505 gradient in Qinghai-Tibet Plateau. *Plant and Soil* 458, 41-58 (2021).

1506 555 Xu, J., Han, C., Jiang, Y. & Zhong, W. Spatial distribution and co-occurrence of aerobic  
1507 ammonia oxidation and anaerobic ammonium oxidation activities in the water-soil interface,  
1508 bulk, and rhizosphere regions of paddy soil. *Plant and Soil* 466, 557-568 (2021).

1509 556 Škerlep, M. et al. Spruce forest afforestation leading to increased Fe mobilization from soils.  
1510 *Biogeochemistry*, 1-18 (2022).

1511 557 Rupp, H., Tauchnitz, N. & Meissner, R. The effects of soil drying out and rewetting on nitrogen  
1512 and carbon leaching—results of a long-term lysimeter experiment. *Water* 13, 2601 (2021).

1513 558 Kupka, D., Kania, M. & Gruba, P. The proximity of a highway increases CO<sub>2</sub> respiration in  
1514 forest soil and decreases the stability of soil organic matter. *Scientific Reports* 11, 21605 (2021).

1515 559 Jeong, Y.-J. et al. Land use types with different fertilization management affected isotope ratios  
1516 of bulk and water-extractable C and N of soils in an intensive agricultural area. *Journal of Soils*

and Sediments, 1-14 (2022).

560 Freppaz, M. et al. Characterization of organic-rich mineral debris revealed by rapid glacier  
 retreat, Indren Glacier, European Alps. *Journal of Mountain Science* 18, 1521-1536 (2021).

561 Farrell, M. & Prober, S. M. Keystone perennial grassland species control soil nitrogen flows.  
*Ecosystems* 24, 1500-1515 (2021).

562 Chibuike, G., Burkitt, L., Bretherton, M., Singh, R. & Bishop, P. Dissolved organic carbon  
 concentration and denitrification capacity of a New Zealand hill country soil after forage crop  
 establishment. *Earth Systems and Environment* 5, 419-432 (2021).

563 Álvarez-López, V. et al. Evidence for nickel mobilisation in rhizosphere soils of Ni  
 hyperaccumulator *Odontarrhena serpyllifolia*. *Plant and Soil* 464, 89-107 (2021).

564 Zhao, D. et al. Effects of contemporary land use types and conversions from wetland to paddy  
 field or dry land on soil organic carbon fractions. *Sustainability* 12, 2094 (2020).

565 Wu, X. et al. Soil organic matter dynamics as affected by land use change from rice paddy to  
 wetland. *Wetlands* 40, 2199-2207 (2020).

566 Wasak, K., Klimek, B. & Drewnik, M. Rapid effects of windfall on soil microbial activity and  
 substrate utilization patterns in the forest belt in the Tatra Mountains. *Journal of Soils and  
 Sediments* 20, 801-815 (2020).

567 Maslov, M. N. & Maslova, O. A. Temperate peatlands use-management effects on seasonal  
 patterns of soil microbial activity and nitrogen availability. *Catena* 190, 104548 (2020).

568 McMillan, R., Quideau, S., MacKenzie, M. & Biryukova, O. Nitrogen mineralization and  
 microbial activity in oil sands reclaimed boreal forest soils. *Journal of environmental quality* 36,  
 1470-1478 (2007).

569 Sackett, T. E., Smith, S. M. & Basiliko, N. Indirect and direct effects of exotic earthworms on  
 soil nutrient and carbon pools in North American temperate forests. *Soil Biology and  
 Biochemistry* 57, 459-467 (2013).

570 Zhang, L. et al. Infrared spectroscopy estimation methods for water-dissolved carbon and amino  
 sugars in diverse Canadian agricultural soils. *Canadian Journal of Soil Science* 98, 484-499  
 (2018).

571 Moore, T. Dissolved organic carbon in a northern boreal landscape. *Global Biogeochemical  
 Cycles* 17 (2003).

572 Lim, S.-S. et al. Soil organic carbon stocks in three Canadian agroforestry systems: From  
 surface organic to deeper mineral soils. *Forest ecology and management* 417, 103-109 (2018).

573 Diochon, A., Gregorich, E. & Tarnocai, C. Evaluating the quantity and biodegradability of soil  
 organic matter in some Canadian Turbic Cryosols. *Geoderma* 202, 82-87 (2013).

574 Oiffer, L. & Siciliano, S. D. Methyl mercury production and loss in Arctic soil. *Science of the  
 total environment* 407, 1691-1700 (2009).

575 Löffgren, S. & Zetterberg, T. Decreased DOC concentrations in soil water in forested areas in  
 southern Sweden during 1987–2008. *Science of the Total Environment* 409, 1916-1926 (2011).

576 Kerr, J. G. & Eimers, M. C. Decreasing soil water Ca<sup>2+</sup> reduces DOC adsorption in mineral  
 soils: Implications for long-term DOC trends in an upland forested catchment in southern  
 Ontario, Canada. *Science of the Total Environment* 427, 298-307 (2012).

577 Ulanowski, T. & Branfireun, B. Small-scale variability in peatland pore-water biogeochemistry,  
 Hudson Bay Lowland, Canada. *Science of the Total Environment* 454, 211-218 (2013).

578 Edwards, K. A. & Jefferies, R. L. Inter-annual and seasonal dynamics of soil microbial biomass

and nutrients in wet and dry low-Arctic sedge meadows. *Soil Biology and Biochemistry* 57, 83-90 (2013).

Xu, W. et al. Deepened snow enhances gross nitrogen cycling among Pan-Arctic tundra soils during both winter and summer. *Soil Biology and Biochemistry* 160, 108356 (2021).

Enanga, E., Creed, I., Casson, N. & Beall, F. Summer storms trigger soil N<sub>2</sub>O efflux episodes in forested catchments. *Journal of Geophysical Research: Biogeosciences* 121, 95-108 (2016).

Ota, M. et al. Could cryoturbic diapirs be key for understanding ecological feedbacks to climate change in high arctic polar deserts? *Journal of Geophysical Research: Biogeosciences* 125, e2019JG005263 (2020).

Vogt, J., Wu, J., Altdorff, D., Le, T. B. & Gong, Y. Nitrous oxide fluxes of a boreal abandoned pasture do not significantly differ from an adjacent natural bog despite distinct environmental conditions. *Science of The Total Environment* 714, 136648 (2020).

Dinsmore, K. J., Skiba, U. M., Billett, M. F., Rees, R. M. & Drewer, J. Spatial and temporal variability in CH<sub>4</sub> and N<sub>2</sub>O fluxes from a Scottish ombrotrophic peatland: Implications for modelling and up-scaling. *Soil Biology and Biochemistry* 41, 1315-1323 (2009).

Van Eynde, E. et al. Soil zinc fertilisation does not increase maize yields but improves nutritional quality. (2022).

Chaplot, V. & Cooper, M. Soil aggregate stability to predict organic carbon outputs from soils. *Geoderma* 243, 205-213 (2015).

Yang, N., Zou, D., Yang, M. & Lin, Z. Variations in soil microbial biomass carbon and soil dissolved organic carbon in the re-vegetation of hilly slopes with purple soil. *PLoS One* 11, e0166536 (2016).

Shao, X., Yang, W. & Wu, M. Seasonal dynamics of soil labile organic carbon and enzyme activities in relation to vegetation types in Hangzhou Bay tidal flat wetland. *PLoS One* 10, e0142677 (2015).

Fujii, K., Hartono, A., Funakawa, S., Uemura, M. & Kosaki, T. Fluxes of dissolved organic carbon in three tropical secondary forests developed on serpentine and mudstone. *Geoderma* 163, 119-126 (2011).

Saunders, T. J., McClain, M. E. & Llerena, C. A. The biogeochemistry of dissolved nitrogen, phosphorus, and organic carbon along terrestrial-aquatic flowpaths of a montane headwater catchment in the Peruvian Amazon. *Hydrological Processes: An International Journal* 20, 2549-2562 (2006).

Wu, H. et al. Modeling dissolved organic carbon in temperate forest soils: TRIPLEX-DOC model development and validation. *Geoscientific Model Development* 7, 867-881 (2014).

Mchunu, C. & Chaplot, V. Land degradation impact on soil carbon losses through water erosion and CO<sub>2</sub> emissions. *Geoderma* 177, 72-79 (2012).

Wolka, K., Biazin, B., Martinsen, V. & Mulder, J. Soil organic carbon and associated soil properties in Enset (*Ensete ventricosum* Welw. Cheesman)-based homegardens in Ethiopia. *Soil and Tillage Research* 205, 104791 (2021).

Martinez-Mena, M., Lopez, J., Almagro, M., Boix-Fayos, C. & Albaladejo, J. Effect of water erosion and cultivation on the soil carbon stock in a semiarid area of South-East Spain. *Soil and Tillage Research* 99, 119-129 (2008).

Qiu, S. et al. Changes in soil carbon and nitrogen pools after shifting from conventional cereal to greenhouse vegetable production. *Soil and Tillage Research* 107, 80-87 (2010).

1605 595 Rizinjirabake, F., Tenenbaum, D. E. & Pilesjö, P. Sources of soil dissolved organic carbon in a  
1606 mixed agricultural and forested watershed in Rwanda. *Catena* 181, 104085 (2019).

1607 596 Cacace, C. et al. Effects of different pioneer and exotic species on the changes of degraded soils.  
1608 *Scientific Reports* 12, 18548 (2022).

1609 597 Xu, X., Miao, H. & Chen, Z. The vertical distribution and their relationship of dissolved organic  
1610 carbon and exchangeable metals in Chinese old-growth forest soils. *African Journal of*  
1611 *Agricultural Research* 6, 998-1008 (2011).

1612 598 Brucker, E., Kernchen, S. & Spohn, M. Release of phosphorus and silicon from minerals by soil  
1613 microorganisms depends on the availability of organic carbon. *Soil Biology and Biochemistry*  
1614 143, 107737 (2020).

1615 599 Ciganda, V. S. et al. Soil nitrous oxide emissions from grassland: Potential inhibitor effect of  
1616 hippuric acid. *Journal of Plant Nutrition and Soil Science* 182, 40-47 (2019).

1617 600 Ge, P., Da, L., Wang, W. & Xu, X. Seasonal dynamics of dissolved organic carbon, nitrogen and  
1618 other nutrients in soil of *Pinus massoniana* stands after pine wilt disease disturbance. *Journal of*  
1619 *soil science and plant nutrition* 14, 75-87 (2014).

1620 601 Undurraga, P., Zagal, E., Sepúlveda, G. & Valderrama, N. Dissolved organic carbon and  
1621 nitrogen in Andisol for six crop rotations with different soil management intensity. *Chilean*  
1622 *Journal of Agricultural Research* 69, 445-454 (2009).

1623 602 Gangloff, S., Stille, P., Pierret, M.-C., Weber, T. & Chabaux, F. Characterization and evolution  
1624 of dissolved organic matter in acidic forest soil and its impact on the mobility of major and trace  
1625 elements (case of the Strengbach watershed). *Geochimica et Cosmochimica Acta* 130, 21-41  
1626 (2014).

1627 603 Oporto, C., Vandecasteele, C. & Smolders, E. Elevated cadmium concentrations in potato tubers  
1628 due to irrigation with river water contaminated by mining in Potosí Bolivia. *Journal of*  
1629 *environmental quality* 36, 1181-1186 (2007).

1630 604 Couic, E. et al. The impact of ecological restoration on biogeochemical cycling and mercury  
1631 mobilization in anoxic conditions on former mining sites in French Guiana. *Microorganisms* 9,  
1632 1702 (2021).

1633 605 Parsapour, M. K., Kooch, Y., Hosseini, S. M. & Alavi, S. J. Litter and topsoil in *Alnus*  
1634 subcordata plantation on former degraded natural forest land: a synthesis of age-sequence. *Soil*  
1635 *and Tillage Research* 179, 1-10 (2018).

1636 606 Dittman, J. A., Driscoll, C. T., Groffman, P. M. & Fahey, T. J. Dynamics of nitrogen and  
1637 dissolved organic carbon at the Hubbard Brook Experimental Forest. *Ecology* 88, 1153-1166  
1638 (2007).

1639 607 Rhoades, C. C. Soil Nitrogen Leaching in Logged Beetle-Killed Forests and Implications for  
1640 Riparian Fuel Reduction. *Journal of Environmental Quality* 48, 305-313 (2019).

1641 608 Rinklebe, J., Shaheen, S. M. & Yu, K. Release of As, Ba, Cd, Cu, Pb, and Sr under pre-definite  
1642 redox conditions in different rice paddy soils originating from the USA and Asia. *Geoderma* 270,  
1643 21-32 (2016).

1644 609 Schwaner, G. W. & Kelly, C. N. American chestnut soil carbon and nitrogen dynamics:  
1645 Implications for ecosystem response following restoration. *Pedobiologia* 75, 24-33 (2019).

1646 610 Patel, K. F. et al. Soil carbon and nitrogen responses to snow removal and concrete frost in a  
1647 northern coniferous forest. *Canadian Journal of Soil Science* 98, 436-447 (2018).

1648 611 Norton, U. et al. Moisture pulses, trace gas emissions and soil C and N in cheatgrass and native

- grass-dominated sagebrush-steppe in Wyoming, USA. *Soil Biology and Biochemistry* 40, 1421-1431 (2008).
- Löfgren, S., Gustafsson, J. P. & Bringmark, L. Decreasing DOC trends in soil solution along the hillslopes at two IM sites in southern Sweden—Geochemical modeling of organic matter solubility during acidification recovery. *Science of the Total Environment* 409, 201-210 (2010).
- Burns, K. N. et al. Vineyard soil bacterial diversity and composition revealed by 16S rRNA genes: differentiation by geographic features. *Soil Biology and Biochemistry* 91, 232-247 (2015).
- Weintraub, M. N., Scott-Denton, L. E., Schmidt, S. K. & Monson, R. K. The effects of tree rhizodeposition on soil exoenzyme activity, dissolved organic carbon, and nutrient availability in a subalpine forest ecosystem. *Oecologia* 154, 327-338 (2007).
- Chambers, L. G. et al. Biogeochemical effects of simulated sea level rise on carbon loss in an Everglades mangrove peat soil. *Hydrobiologia* 726, 195-211 (2014).
- Pschenyckyj, C. M., Clark, J. M., Shaw, L. J., Griffiths, R. I. & Evans, C. D. Effects of acidity on dissolved organic carbon in organic soil extracts, pore water and surface litters. *Science of the Total Environment* 703, 135585 (2020).
- Spears, J. D., Holub, S., Harmon, M. & Lajtha, K. The influence of decomposing logs on soil biology and nutrient cycling in an old-growth mixed coniferous forest in Oregon, USA. *Canadian Journal of Forest Research* 33, 2193-2201 (2003).
- Zheng, J. et al. A long-term hybrid poplar plantation on cropland reduces soil organic carbon mineralization and shifts microbial community abundance and composition. *Applied Soil Ecology* 111, 94-104 (2017).
- Zhao, M., Wang, M., Zhao, Y., Jiang, M. & Wang, G. Variations in concentration and carbon isotope composition of methanotroph biomarkers in sedge peatlands along the altitude gradient in the Changbai Mountain, China. *Frontiers in Microbiology* 13, 892430 (2022).
- Wardinski, K. M. et al. Water-soluble organic matter from soils at the terrestrial-Aquatic interface in Wetland-dominated landscapes. *Journal of Geophysical Research: Biogeosciences* 127, e2022JG006994 (2022).
- Wang, H., Wu, J., Li, G., Yan, L. & Wei, X. Effects of rainfall frequency on soil labile carbon fractions in a wet meadow on the Qinghai-Tibet Plateau. *Journal of Soils and Sediments* 22, 1489-1499 (2022).
- Morgalev, S. Y. et al. Fractionation of organic C, nutrients, metals and bacteria in peat porewater and ice after freezing and thawing. *Environmental Science and Pollution Research* 30, 823-836 (2023).
- Pintaldi, E. et al. Snowbed communities and soil C and N dynamics during a four-year investigation in the NW-Italian Alps. *Arctic, Antarctic, and Alpine Research* 54, 368-385 (2022).
- Du, W., Wang, D., Wu, X., Zhao, L. & Zang, S. Effects of Forest Types on SOC and DOC in the Permafrost Region of the Daxing'anling Mountains. *Processes* 10, 1293 (2022).
- Zhang, F. et al. Analysis of UV–VIS spectral characteristics and content estimation of soil DOM under mulching practices. *Ecological Indicators* 138, 108869 (2022).
- Yang, Y. et al. Variations in the composition of tea leaves and soil microbial community. *Biology and Fertility of Soils* 58, 167-179 (2022).
- Zhang, R. et al. Changes in the characteristics of soil dissolved organic matter over time since inter-planting with white clover (*Trifolium repens* L.) in apple orchards on the Loess Plateau in

China. *Plant and Soil*, 1-18 (2022).

628 Darusman, T., Murdiyarso, D., Imprun, I., Chaniago, I. A. & Lestari, D. P. Carbon dynamics in  
rewetted tropical peat swamp forests. *Climate* 10, 35 (2022).

629 Aaltonen, H. et al. The effects of glucose addition and water table manipulation on peat quality  
of drained peatland forests with different management practices. *Soil Science Society of  
America Journal* 86, 1625-1638 (2022).

630 Xiang, F. et al. Black soldier fly larvae vermicompost alters soil biochemistry and bacterial  
community composition. *Applied Microbiology and Biotechnology* 106, 4315-4328 (2022).

631 Garc ía, P. E., Mansilla Ferro, C. F. & Di éguez, M. C. Characterisation of dissolved organic  
matter from temperate wetlands: field dynamics and photoreactivity changes driven by natural  
inputs and diagenesis along the hydroperiod. *New Zealand Journal of Marine and Freshwater  
Research* 57, 480-494 (2023).

632 Xiong, X. et al. Carbon and nitrogen availability drives seasonal variation in soil microbial  
communities along an elevation gradient. *Forests* 13, 1657 (2022).

633 Xu, W., Elberling, B. & Ambus, P. L. Pyrogenic organic matter as a nitrogen source to microbes  
and plants following fire in an Arctic heath tundra. *Soil Biology and Biochemistry* 170, 108699  
(2022).

634 Li, X. et al. Switchgrass cropping systems affect soil carbon and nitrogen and microbial  
diversity and activity on marginal lands. *GCB Bioenergy* 14(8), 918–940 (2022).

635 Gong, S. et al. Effect of stand age on the temporal dynamics of soil active carbon and nitrogen  
in Chinese cypress artificial forests. *Soil Science and Plant Nutrition* 68, 64-71 (2022).

636 Prijac, A., Gandois, L., Jeanneau, L., Taillardat, P. & Garneau, M. Dissolved organic matter  
concentration and composition discontinuity at the peat–pool interface in a boreal peatland.  
*Biogeosciences* 19, 4571-4588 (2022).

637 Moens, C., Dondeyne, S., Panagea, I. & Smolders, E. Depth profile of colloidal iron in the pore  
water of an Albic Podzol. *European Journal of Soil Science* 73, e13305 (2022).

638 Friedl, J. et al. Amplitude and frequency of wetting and drying cycles drive N<sub>2</sub> and N<sub>2</sub>O  
emissions from a subtropical pasture. *Biology and Fertility of Soils* 58, 593-605 (2022).

639 Huang, W.-H., Lin, T.-C., Huang, C.-M., Chen, T.-C. & Yeh, Y.-L. Copper distribution and  
binding affinity of size-fractioned humic substances taken from paddy soil and correlation with  
optical characteristics. *Agronomy* 12, 1689 (2022).

640 Rindt, O. et al. Biogeochemical dynamics during snowmelt and in summer in the Alps.  
*Biogeochemistry* 162, 257-266 (2023).

641 Zhao, R., He, M. & Liu, F. Differential linkages between soil respiration components and  
microbial community structures under long-term forest conversion. *Journal of Soils and  
Sediments* 22, 1252-1262 (2022).

642 Li, H., Yang, Y., Crabbe, M. J. C. & Chen, H. The Characteristics of Dissolved Organic Matter  
and Soil Microbial Communities in the Soils of *Larix principis-rupprechtii* Mayr. Plantations in  
the Qinling Mountains, China. *Sustainability* 14, 11968 (2022).

643 Leogrande, R. et al. Reclaimed water use in agriculture: effects on soil chemical and biological  
properties in a long-term irrigated citrus farm. *Agronomy* 12, 1317 (2022).

644 Behnke, M., Fellman, J. B., D'Amore, D. V., Gomez, S. & Spencer, R. From canopy to  
consumer: what makes and modifies terrestrial DOM in a temperate forest. *Biogeochemistry*  
164, 185-205 (2023).

1737 645 Ricardo, S.-M. et al. Exploring dissolved organic carbon variations in a high elevation tropical  
1738 peatland ecosystem: Cerro de la Muerte, Costa Rica. *Frontiers in Water* 3, 742780 (2022).

1739 646 Eder, A. et al. Pathways and composition of dissolved organic carbon in a small agricultural  
1740 catchment during base flow conditions. *Ecohydrology & Hydrobiology* 22, 96-112 (2022).

1741 647 McFarland, J. W. et al. Mechanisms for retention of low molecular weight organic carbon varies  
1742 with soil depth at a coastal prairie ecosystem. *Soil Biology and Biochemistry* 168, 108601  
1743 (2022).

1744 648 Sokołowska, J., Józefowska, A. & Zaleski, T. Impact of natural forest succession on changes in  
1745 soil organic carbon in the polish Carpathian mountains. *Forests* 13, 744 (2022).

1746 649 Zhang, L. et al. Composition characteristics of dissolved organic matter at the vegetation-soil  
1747 interface under the influence of mining disturbances. *Polish Journal of Environmental Studies*  
1748 31, 439-449 (2021).

1749 650 de Aguiar Santiago, F. L. et al. Rehabilitation promotes rapid recovery of arbuscular mycorrhizal  
1750 fungi in iron mining areas. *Pedobiologia* 95, 150838 (2022).

1751 651 Guan, J. et al. Responses of soil active organic carbon fractions and enzyme activities to  
1752 freeze-thaw cycles in Wetlands. *Wetlands* 42, 36 (2022).

1753 652 Yates, C. A. et al. Determining patterns in the composition of dissolved organic matter in fresh  
1754 waters according to land use and management. *Biogeochemistry* 164, 143-162 (2023).

1755 653 Kaneko, S., Furusawa, H., Okamoto, T. & Hirano, Y. Dissolved Organic Matter (DOM) in a  
1756 Warm-Temperate Forested Watershed—A Possibility of Ultraviolet Absorbance as an Indicator  
1757 of DOM. *Forests* 13, 510 (2022).

1758 654 Fan, Q., Yang, Y., Geng, Y., Wu, Y. & Niu, Z. Biochemical composition and function of  
1759 subalpine shrubland and meadow soil microbiomes in the Qilian Mountains, Qinghai–Tibetan  
1760 plateau, China. *PeerJ* 10, e13188 (2022).

1761 655 Cui, J. et al. Correlations between dominant vegetation type and composition and diversity of  
1762 soil bacterial communities in a subtropical forest. *Soil Science Society of America Journal* 86,  
1763 1123-1137 (2022).

1764 656 Zhang, H., Zheng, X., Cai, Y. & Chang, S. X. Land-use change enhanced soc mineralization but  
1765 did not significantly affect its storage in the surface layer. *International Journal of*  
1766 *Environmental Research and Public Health* 19, 3020 (2022).

1767 657 Startsev, V. V., Yakovleva, E. V., Kutyavin, I. N. & Dymov, A. A. Fire impact on carbon pools  
1768 and basic properties of retisols in native spruce forests of the European North and Central  
1769 Siberia of Russia. *Forests* 13, 1135 (2022).

1770 658 Kobierski, M. & Banach-Szott, M. Organic matter in riverbank sediments and fluvisols from the  
1771 flood zones of lower vistula river. *Agronomy* 12, 536 (2022).

1772 659 Cui, Q. et al. Response of soil carbon fractions and enzyme activities to mowing management  
1773 on in a coastal wetland of the yellow river delta. *Frontiers in Marine Science* 9, 993181 (2022).

1774 660 Davis, C. J., Presley, D. R., Rivard, C. L., Griffin, J. J. & Tomlinson, P. J. Conservation systems  
1775 influence on soil properties in pumpkin production. *Soil Science Society of America Journal* 86,  
1776 435-449 (2022).

1777 661 Długosz, J. & Piotrowska-Długosz, A. Changes in carbon-degrading enzyme activities and  
1778 microbial biomass content—The effect of soil depth and soil-forming processes. *Applied Soil*  
1779 *Ecology* 180, 104629 (2022).

1780 662 Fujii, K., Funakawa, S. & Kosaki, T. Effects of forest management on soil acidification in cedar

1781           plantation. *Geoderma* 424, 115967 (2022).

1782   663   Glina, B. et al. Local weather conditions determine DOC production and losses from  
1783           agricultural fen soils affected by open-pit lignite mining. *Catena* 211, 106012 (2022).

1784   664   He, G. et al. Forest succession improves the complexity of soil microbial interaction and  
1785           ecological stochasticity of community assembly: Evidence from *Phoebe bournei*-dominated  
1786           forests in subtropical regions. *Frontiers in Microbiology* 13, 1021258 (2022).

1787   665   He, Y. et al. Drivers of soil respiration and nitrogen mineralization change after litter  
1788           management at a subtropical Chinese sweetgum tree plantation. *Soil Use and Management* 39,  
1789           92-103 (2023).

1790   666   Hu, L., Li, Q., Yan, J., Liu, C. & Zhong, J. Vegetation restoration facilitates belowground  
1791           microbial network complexity and recalcitrant soil organic carbon storage in southwest China  
1792           karst region. *Science of the Total Environment* 820, 153137 (2022).

1793   667   Kaba, M., Mesnage, V., Sakho, I., Faye, S. & Boussafir, M. Processes controlling the organic  
1794           matter degradation in a tropical coastal wetland: Mboro, Senegal. *Catena* 217, 106419 (2022).

1795   668   Kooch, Y., Ghorbanzadeh, N., Kuzyakov, Y., Praeg, N. & Ghaderi, E. Investigation of the effects  
1796           of the conversion of forests and rangeland to cropland on fertility and soil functions in  
1797           mountainous semi-arid landscape. *Catena* 210, 105951 (2022).

1798   669   Li, C. et al. Soil dissolved carbon and nitrogen dynamics along a revegetation chronosequence  
1799           of *Caragana korshinskii* plantations in the Loess hilly region of China. *Catena* 216, 106405  
1800           (2022).

1801   670   Li, J. et al. Characteristics of soil carbon emissions and bacterial community composition in  
1802           peatlands at different stages of vegetation succession. *Science of the Total Environment* 839,  
1803           156242 (2022).

1804   671   Li, J., Sun, X., Li, M., Zou, J. & Bian, H. Effects of stand age and soil organic matter quality on  
1805           soil bacterial and fungal community composition in *Larix gmelinii* plantations, Northeast China.  
1806           *Land Degradation & Development* 33, 1249-1259 (2022).

1807   672   Li, Y., Chen, J., Feng, H. & Siddique, K. H. Plastic mulching significantly improves soil enzyme  
1808           and microbial activities without mitigating gaseous N emissions in winter wheat-summer maize  
1809           rotations. *Field Crops Research* 286, 108630 (2022).

1810   673   Liang, K. et al. Changes in quantity and quality of dissolved organic carbon in purple soil: Roles  
1811           of land use and soil depth. *Land Degradation & Development* 34, 327-337 (2023).

1812   674   Liu, S. et al. Seasonal freeze-thaw characteristics of soil carbon pools under different vegetation  
1813           restoration types on the Longzhong Loess Plateau. *Frontiers in Ecology and Evolution* 10,  
1814           1019627 (2022).

1815   675   Liu, X. et al. Spatial distribution of soil iron across different plant communities along a  
1816           hydrological gradient in the Yellow River Estuary wetland. *Frontiers in Ecology and Evolution*  
1817           10, 979194 (2022).

1818   676   Liu, Y. et al. Changes in soil microbial metabolic activity following long-term forest succession  
1819           on the central Loess Plateau, China. *Land Degradation & Development* 34, 723-735 (2023).

1820   677   Mohseni, N. & Hosseinzadeh, S. R. Soil erosion progression under rill and gully erosion  
1821           processes and its effect on variations of mechanisms controlling C mineralization ratio.  
1822           *Ecohydrology & Hydrobiology* 22, 370-378 (2022).

1823   678   Nasonova, A., Levy, G. J., Rinot, O., Eshel, G. & Borisover, M. Organic matter in aqueous soil  
1824           extracts: Prediction of compositional attributes from bulk soil mid-IR spectra using partial least

square regressions. *Geoderma* 411, 115678 (2022).

Ren, B. et al. Appraisal of different land use systems for heterotrophic respiration in a Karst landscape. *Environmental Research* 212, 113480 (2022).

Wang, C., Xue, L. & Jiao, R. Stoichiometric imbalances and the dynamics of phosphatase activity and the abundance of *phoC* and *phoD* genes with the development of *Cunninghamia lanceolata* (Lamb.) Hook plantations. *Applied Soil Ecology* 173, 104373 (2022).

Lei, B., Xu, Y., Tang, Y. & Hauptfleisch, K. Shifts in carbon stocks through soil profiles following management change in intensive agricultural systems. *Agricultural Sciences* 6, 304-314 (2015).

Liu, H. et al. Effects of the interaction between temperature and revegetation on the microbial degradation of soil dissolved organic matter (DOM)—A DOM incubation experiment. *Geoderma* 337, 812-824 (2019).

Wen-jun, Z. et al. Characteristics and influencing factors of soil dissolved organic carbon and nitrogen in a tropical seasonal rainforest in Xishuangbanna, Southwest China. *Journal of Beijing Forestry University* 38, 34-41 (2016).

Yu-Lai, W., Chang-Ming, Y., Li-Min, Z. & Heng-Zhao, C. Spatial distribution and fluorescence properties of soil dissolved organic carbon across a riparian buffer wetland in Chongming Island, China. *Pedosphere* 25, 220-229 (2015).

Liu, S. et al. The role of UV-B radiation and precipitation on straw decomposition and topsoil C turnover. *Soil Biology and Biochemistry* 77, 197-202 (2014).

Yao, S., Qin, J., Peng, X. & Zhang, B. The effects of vegetation on restoration of physical stability of a severely degraded soil in China. *Ecological Engineering* 35, 723-734 (2009).

Qiu, Q. et al. Effects of plant-derived dissolved organic matter (DOM) on soil CO<sub>2</sub> and N<sub>2</sub>O emissions and soil carbon and nitrogen sequestrations. *Applied Soil Ecology* 96, 122-130 (2015).

Long, G.-Q., Jiang, Y.-J. & Sun, B. Seasonal and inter-annual variation of leaching of dissolved organic carbon and nitrogen under long-term manure application in an acidic clay soil in subtropical China. *Soil and Tillage Research* 146, 270-278 (2015).

Liu, T., Liu, C., Zhang, W. & Tu, C. Concentrations and migration features of dissolved organic carbon in the soils of slope lands in Karst area. *China Environmental Science* 29, 248-253 (2009).

Zhang, J., Song, C. & Yang, W. Seasonal dynamics of dissolved organic carbon and its impact factors in the Doyeuxia augustifolia marsh soil. *Acta Scientiae Circumstantiae* 25, 1397-1402 (2005).

Xiao, Y., Huang, Z., Wu, H. & Lv, X. Compositions and contents of active organic carbon in different wetland soils in Sanjiang Plain, Northeast China. *Acta Ecol Sin* 23, 7625-7633 (2015).

WANG, W., YANG, Y.-s., CHEN, G.-s., GUO, J.-f. & QIAN, W. Profile distribution and seasonal variation of soil dissolved organic carbon in natural *Castanopsis fabric* forest in subtropical China. *Chinese Journal of Ecology* 27, 924 (2008).

Shu-fen, L., Yuan-chun, Y. & Sheng, H. Correlation between dissolved organic carbon and soil factors of the forest soil in southern of China. *浙江农林大学学报* 20, 119-123 (2003).

Lei, B., Fan, M., Chen, Q., Six, J. & Zhang, F. Conversion of wheat–maize to vegetable cropping systems changes soil organic matter characteristics. *Soil Science Society of America Journal* 74, 1320-1326 (2010).

- 1869 695 Lu, S. et al. Patterns and drivers of soil respiration and vegetation at different altitudes in  
1870 Southern China. *Applied Ecology & Environmental Research* 17 (2019).
- 1871 696 Lin, C., Larsen, E., Grace, P. & Smith, J. in *Soil solutions for a changing world: Proceedings of*  
1872 *the 19th World Congress of Soil Science*. 27-30 (International Union of Soil Sciences).
- 1873 697 Cookson, W. et al. Controls on soil nitrogen cycling and microbial community composition  
1874 across land use and incubation temperature. *Soil Biology and Biochemistry* 39, 744-756 (2007).
- 1875 698 Mavi, M. S. Evaluation of extractants to quantify dissolved organic carbon and nitrogen in  
1876 dissimilar soils. *Journal of the Indian Society of Soil Science* 66, 111-115 (2018).
- 1877 699 Kaiser, C. et al. Belowground carbon allocation by trees drives seasonal patterns of extracellular  
1878 enzyme activities by altering microbial community composition in a beech forest soil. *New*  
1879 *Phytologist* 187, 843-858 (2010).
- 1880 700 Vandenbruwane, J., De Neve, S., Qualls, R. G., Sleutel, S. & Hofman, G. Comparison of  
1881 different isotherm models for dissolved organic carbon (DOC) and nitrogen (DON) sorption to  
1882 mineral soil. *Geoderma* 139, 144-153 (2007).
- 1883 701 Filep, T., Kincses, I. & Nagy, P. Dissolved organic carbon (DOC) and dissolved organic nitrogen  
1884 (DON) content of an arenosol as affected by liming in a pot experiment. *Archives of Agronomy*  
1885 *and Soil Science* 49, 111-117 (2003).
- 1886 702 Novara, A. et al. Dynamics of soil organic carbon pools after agricultural abandonment.  
1887 *Geoderma* 235, 191-198 (2014).
- 1888 703 Jaszczyński, J. The relationship between dissolved organic carbon and hydro-climatic factors in  
1889 peat-muck soil. *Journal of Water and Land Development* (2015).
- 1890 704 Cox, L. et al. Effect of exogenous carbon on movement of simazine and 2, 4-D in soils. *Soil*  
1891 *science society of America journal* 65, 1688-1695 (2001).
- 1892 705 Maxin, C. R. & Kögel-Knabner, I. Partitioning of polycyclic aromatic hydrocarbons (PAH) to  
1893 water-soluble soil organic matter. *European Journal of Soil Science* 46, 193-204 (1995).
- 1894 706 Matschonat, G. & Vogt, R. Assessment of a laboratory method to obtain the equilibrium solution  
1895 composition of forest soils. *European journal of soil science* 48, 545-552 (1997).
- 1896 707 Ludwig, B., Khanna, P. & Prenzel, J. Use of a coupled equilibrium model to describe the  
1897 buffering of protons and hydroxyl ions in some acid soils. *Zeitschrift für Pflanzenernährung und*  
1898 *Bodenkunde* 161, 547-554 (1998).
- 1899 708 Austnes, K. & Vestgarden, L. S. Prolonged frost increases release of C and N from a montane  
1900 heathland soil in southern Norway. *Soil Biology and Biochemistry* 40, 2540-2546 (2008).
- 1901 709 Sowerby, A., Emmett, B., Williams, D., Beier, C. & Evans, C. The response of dissolved organic  
1902 carbon (DOC) and the ecosystem carbon balance to experimental drought in a temperate  
1903 shrubland. *European Journal of Soil Science* 61, 697-709 (2010).
- 1904 710 Hughes, S., Reynolds, B. & Roberts, J. The influence of land management on concentrations of  
1905 dissolved organic carbon and its effects on the mobilization of aluminium and iron in podzol  
1906 soils in Mid-Wales. *Soil use and management* 6, 137-145 (1990).
- 1907 711 McDowell, W. H. & Wood, T. Podzolization: soil processes control dissolved organic carbon  
1908 concentrations in stream water. *Soil Science* 137, 23-32 (1984).
- 1909 712 Qualls, R. G. & Richardson, C. J. Factors controlling concentration, export, and decomposition  
1910 of dissolved organic nutrients in the Everglades of Florida. *Biogeochemistry* 62, 197-229  
1911 (2003).
- 1912 713 Yavitt, J. Carbon dynamics in Appalachian peatlands of west Virginia and western Maryland.

- 1913 Water, Air, and Soil Pollution 77, 271-290 (1994).
- 1914 714 Fröberg, M. et al. Low dissolved organic carbon input from fresh litter to deep mineral soils.  
1915 Soil Science Society of America Journal 71, 347-354 (2007).
- 1916 715 Yang, G. et al. Responses of CO<sub>2</sub> emission and pore water DOC concentration to soil warming  
1917 and water table drawdown in Zoige Peatlands. Atmospheric Environment 152, 323-329 (2017).
- 1918 716 Ying, C., Shaoqiang, W., Jingyuan, W., Peichl, M. & Falahatar, S. Dissolved organic carbon  
1919 dynamics and controls of planted slash pine forest soil in subtropical region in southern China.  
1920 Journal of Resources and Ecology 4, 105-114 (2013).
- 1921 717 Pesántez, J., Mosquera, G. M., Crespo, P., Breuer, L. & Windhorst, D. Effect of land cover and  
1922 hydro-meteorological controls on soil water DOC concentrations in a high-elevation tropical  
1923 environment. Hydrological Processes 32, 2624-2635 (2018).
- 1924 718 Panneer Selvam, B., Laudon, H., Guillemette, F. & Berggren, M. Influence of soil frost on the  
1925 character and degradability of dissolved organic carbon in boreal forest soils. Journal of  
1926 Geophysical Research: Biogeosciences 121, 829-840 (2016).
- 1927 719 Andreasson, F., Bergkvist, B. & Bååth, E. Bioavailability of DOC in leachates, soil matrix  
1928 solutions and soil water extracts from beech forest floors. Soil Biology and Biochemistry 41,  
1929 1652-1658 (2009).
- 1930 720 Ågren, A. M., Haei, M., Blomkvist, P., Nilsson, M. B. & Laudon, H. Soil frost enhances stream  
1931 dissolved organic carbon concentrations during episodic spring snow melt from boreal mires.  
1932 Global Change Biology 18, 1895-1903 (2012).
- 1933 721 Raastad, I. A. & Mulder, J. Dissolved organic matter (DOM) in acid forest soils at Gådsjön  
1934 (Sweden): natural variabilities and effects of increased input of nitrogen and of reversal of  
1935 acidification. Water, air and soil pollution 114, 199 (1999).
- 1936 722 Shafiquzzaman, M. et al. Identification and characterization of dissolved organic matter sources  
1937 in Kushiro river impacted by a wetland. Ecological engineering 70, 459-464 (2014).
- 1938 723 Kawahigashi, M., Sumida, H. & Yamamoto, K. Seasonal changes in organic compounds in soil  
1939 solutions obtained from volcanic ash soils under different land uses. Geoderma 113, 381-396  
1940 (2003).
- 1941 724 Funakawa, S., Hirai, H. & Kyuma, K. Soil-forming processes under natural forest north of  
1942 Kyoto in relation to soil solution composition. Soil Science and Plant Nutrition 38, 101-112  
1943 (1992).
- 1944 725 Stumpe, B. & Marschner, B. Dissolved organic carbon from sewage sludge and manure can  
1945 affect estrogen sorption and mineralization in soils. Environmental Pollution 158, 148-154  
1946 (2010).
- 1947 726 Macdonald, A., Murphy, D., Mahieu, N. & Fillery, I. Labile soil organic matter pools under a  
1948 mixed grass/lucerne pasture and adjacent native bush in Western Australia. Soil Research 45,  
1949 333-343 (2007).
- 1950 727 Camino-Serrano, M. et al. ORCHIDEE-SOM: modeling soil organic carbon (SOC) and  
1951 dissolved organic carbon (DOC) dynamics along vertical soil profiles in Europe. Geoscientific  
1952 Model Development 11, 937-957 (2018).
- 1953 728 Marques, J. D. d. O., Luiz ão, F. J., Teixeira, W. G. & Ferreira, S. J. F. Variations of dissolved  
1954 organic carbon and soil physical properties under different land uses in Central Amazônia.  
1955 Volume 36, Número 2, Pags. 611-622 (2012).
- 1956 729 Lu, Y., Wassmann, R., Neue, H.-U. & Huang, C. Dynamics of dissolved organic carbon and

methane emissions in a flooded rice soil. *Soil Science Society of America Journal* 64, 2011-2017 (2000).

730 Oosterwoud, M., Temminghoff, E. & van der Zee, S. Quantification of DOC concentrations in relation with soil properties of soils in tundra and taiga of Northern European Russia. *Biogeosciences Discussions* 7, 3189-3226 (2010).

731 Buckeridge, K. M., Cen, Y.-P., Layzell, D. B. & Grogan, P. Soil biogeochemistry during the early spring in low arctic mesic tundra and the impacts of deepened snow and enhanced nitrogen availability. *Biogeochemistry* 99, 127-141 (2010).

732 Fang, H. et al. Experimental nitrogen deposition alters the quantity and quality of soil dissolved organic carbon in an alpine meadow on the Qinghai-Tibetan Plateau. *Applied Soil Ecology* 81, 1-11 (2014).

733 Fang, H. et al. Changes in soil heterotrophic respiration, carbon availability, and microbial function in seven forests along a climate gradient. *Ecological Research* 29, 1077-1086 (2014).

734 Iqbal, J. et al. Microbial biomass, and dissolved organic carbon and nitrogen strongly affect soil respiration in different land uses: A case study at Three Gorges Reservoir Area, South China. *Agriculture, Ecosystems & Environment* 137, 294-307 (2010).

735 Jones, D., Hughes, L., Murphy, D. & Healey, J. Dissolved organic carbon and nitrogen dynamics in temperate coniferous forest plantations. *European journal of soil science* 59, 1038-1048 (2008).

736 Li, W. et al. Soil available nitrogen, dissolved organic carbon and microbial biomass content along altitudinal gradient of the eastern slope of Gongga Mountain. *Acta Ecologica Sinica* 33, 266-271 (2013).

737 Liu, C. P. & Sheu, B. H. Dissolved organic carbon in precipitation, throughfall, stemflow, soil solution, and stream water at the Guandaushi subtropical forest in Taiwan. *Forest Ecology and Management* 172, 315-325 (2003).

738 Linghong Z. Effects of Winter Green Manure Crops with and Without Chicken Grazing on CH<sub>4</sub> and CO<sub>2</sub> Emissions, Soil Nutrients and Yield in a Double-Crop Rice Paddy Field in South China. 2017. (In Chinese)

739 Shan L. The study on N<sub>2</sub>O flux from different land uses in three gorges reservoir area. 2011. (In Chinese)

740 Guo, K. Effect of Biochars Prepared from Different Feedstocks and Pyrolysis Temperatures on the Structure and Function of Microbial Communities in a Bamboo (*Phyllostachys Praecox*) Plantation Soil. 2021. (In Chinese)

741 Yuan, Q. Study on soil organic carbon fractions in different land use types. 2013. (In Chinese)

742 Yin, Y. Effects of biochars addition on the mineralization of soil organic carbon under different incubation conditions. 2018. (In Chinese)

743 Ai, N. Nitrogen immobilization by soil microbial biomass and its control in different soils. 2008. (In Chinese)

744 Li, L. Effects of different N level on soil organic carbon stability in meadow chernozemic soil. 2014. (In Chinese)

745 Liang, H. Effect of different fertilization on CO<sub>2</sub> emission for a paddy-upland rotation purple soil under wheat. 2011. (In Chinese)

746 Chen, J. Effects of different fertilizer sources and tillage practices on GHG emissions and soil carbon pool in paddy fields. 2016. (In Chinese)

2001 747 Wang, Q. Effects of different ways of straw returning on soil greenhouse gas emissions in  
2002 sloping cropland. 2016. (In Chinese)

2003 748 Zhou, W. Temperature Sensitivity and Driving Factors Analysis of Soil Organic Carbon  
2004 Decomposition across Chinese Typical Cropland. 2020. (In Chinese)

2005 749 Pei, X. Effect of long-term fertilization on diversity of soil microbial community structure under  
2006 different cropping systems. 2010. (In Chinese)

2007 750 Yin, C. Responses of N<sub>2</sub>O Emission and Reduction as well as Associated Microbes to  
2008 Temperature and Different Fertilization Regimes in Arable Soils. 2017. (In Chinese)

2009 751 Gao, Z. Contents and characteristics of soluble organic carbon, nitrogen in the arable soil. 2009.  
2010 (In Chinese)

2011 752 Liu, Y. Effects of Organic Fertilizer Substituting Mineral Nitrogen Fertilizer on Soil Carbon and  
2012 753 Absorbed Nutrient in Spring Wheat. 2021. (In Chinese)

2013 753 Zhang, L. Integrative effects of green manure and straw incorporation on greenhouse gas  
2014 emissions and environmental performance under the typical rice cropping systems in southern  
2015 china. 2018. (In Chinese)

2016 754 Zhou, G. The Characteristics of Carbon and Nitrogen Transformation under the  
2017 Co-incorporation of Rice Straw and Leguminous Green Manures in Double Rice Field in  
2018 Southern China. 2017. (In Chinese)

2019 755 Wu, L. Effects of land-use conversion from double-rice to vegetable cultivation on net  
2020 ecosystem carbon budget and greenhouse gas emissions. 2018. (In Chinese)

2021 756 Cheng, H. Responses of soil active organic carbon, nitrogen and rice yield to Chinese milk vetch  
2022 application rates. 2020. (In Chinese)

2023 757 Yu, J. Study on the effect of fertilizing management on carbon and nitrogen of black soil. 2010.  
2024 (In Chinese)

2025 758 Wang, Y. Effects of water and fertilizer treatments based on vetch and *orychophragmus*  
2026 *violaceus* on soil fertility and composition of active organic carbon. 2020. (In Chinese)

2027 759 Guo, Y. Effects of exogenous carbon addition on organic carbon mineralization, humification  
2028 and enzyme activities in agricultural soils. 2020. (In Chinese)

2029 760 Li, Y. Effects of multi-year application of biochar on carbon cycle of tobacco-growing soils in  
2030 Henan Province. 2019. (In Chinese)

2031 761 Zhu, W. Effect of combined amendment of wheat and huai bean straws on soil organic carbon  
2032 sequestration. 2018. (In Chinese)

2033 762 Chang, D. Characteristics of Soil Dissolved Organic Matter in Main Green Manure Plantation  
2034 Systems in China. 2015. (In Chinese)

2035 763 Zhang, W. Effects of amendments on soil organic carbon fractions and microbial in upland red  
2036 soil. 2017. (In Chinese)

2037 764 Deng, B. Effects of ameliorant application on greenhouse gas emissions from *camellia oleifera*  
2038 plantation soil under nitrogen fertilization. 2020. (In Chinese)

2039 765 Zhu, J. Study on the change of soil organic carbon and the prediction model of total organic  
2040 carbon based on hyperspectral after biochar addition. 2017. (In Chinese)

2041 766 Yang, X. Study of application nitrogen fertilizer rate on soil labile pools and their effects in  
2042 different managements condition. 2016. (In Chinese)

2043 767 Pu, D. Effects of application of biogas slurry and biochar on soil active organic carbon and  
2044 nitrogen in poplar forest. 2015. (In Chinese)

2045 768 Xu, Y. Application of rice straw and engineered bacteria on the biochemical properties of Cu and  
2046 Cd-polluted soil. 2011. (In Chinese)

2047 769 Yu, P. Characteristics and mechanisms of organic matter mineralization influenced by  
2048 fertilization and land use in red soil and paddy soil. 2021. (In Chinese)

2049 770 Chen, W. Fertilization effects on active organic carbons and soil structure in black soil farmland  
2050 with different soil organic matter contents. 2013. (In Chinese)

2051 771 Liu, S. Preliminary mechanism study on the effect of fertilization on reactive minerals and their  
2052 carbon sequestration in upland red soil. 2016. (In Chinese)

2053 772 Sun, D. Effect of fertilization practice on the constitution and bioavailability of dissolved  
2054 organic carbon in red paddy soil. 2014. (In Chinese)

2055 773 Ji, X. Effects of Combined Application of Organic and Inorganic Fertilizers on Carbon and  
2056 Nitrogen Characteristics and Bacterial Community Structure of Purple Soil. 2020. (In Chinese)

2057 774 Xu, L. Effects of Liquid Organic Fertilizer Application on Soil Biological Properties and Active  
2058 Organic Carbon Components in Navel Orange Orchard. 2021. (In Chinese)

2059 775 Sun, H. Effect of Organic Fertilizer and Inorganic Fertilizer Application on N<sub>2</sub>O and NO  
2060 Emissions from Fluvio-aquic Soil in the North China Plain. 2020. (In Chinese)

2061 776 Liu, R. Study on the mechanism of the improvement of soil organic matter under simulated  
2062 maize straw and biochar returning in a black soil. 2021. (In Chinese)

2063 777 Yang, J. Dynamic and leaching characteristics of soluble organic nitrogen compositions in  
2064 paddy soil under different fertilization treatments during rice growth period. 2018. (In Chinese)

2065 778 Shen, Z. CO<sub>2</sub> and N<sub>2</sub>O Emission Characteristics and Impact Factors in Farmland under Biogas  
2066 Slurry Irrigation. 2015. (In Chinese)

2067 779 Zhao, L. Effects of fertilization on cucumber growth and soil fertility in greenhouse continuous  
2068 cropping under soil deterioration. 2015. (In Chinese)

2069 780 Zheng, L. Effects of combined applications of pig manure and chemical fertilizers on CH<sub>4</sub> and  
2070 N<sub>2</sub>O emissions and their global warming potentials in paddy fields with double-rice cropping.  
2071 2015. (In Chinese)

2072 781 Lu, Y. Influences of combining biochar and nitrogen fertilization on red soil nematode  
2073 assemblages and soil enzyme activities. 2015. (In Chinese)

2074 782 Yu, L. The effects of biochar on acidic soil amelioration and soil nitrification. 2019. (In Chinese)

2075 783 Wu, Y. Effects of biochar application on bacterial diversity and physical-chemical properties in  
2076 fluvio-aquic soil of north China. 2014. (In Chinese)

2077 784 Wang, J. Effect of biochar application on the composition and stability of organic carbon in deep  
2078 paddy soil. 2020. (In Chinese)

2079 785 Xue, S. Effects of biochar addition on soil labile C and N contents in a subtropical evergreen  
2080 forest. 2018. (In Chinese)

2081 786 Yu, M. Rhizosphere Effects of Biochar and Its Associated Key Processes of Soil Nitrogen  
2082 Transformation. 2021. (In Chinese)

2083 787 An, Y. Effect of biochar application on soil aggregates distribution and organic carbon fractions.  
2084 2016. (In Chinese)

2085 788 Xu, L. Effect of biochar on soil properties and soil organic carbon pool. 2013. (In Chinese)

2086 789 Ran, J. Effects of phosphorus fertilizer application and different optimized measures on  
2087 rhizosphere process, yield and phosphorus use efficiency of winter wheat in dryland. 2021. (In  
2088 Chinese)

2089 790 Wang, W. Impact of Annual Straw Management and Fertilizer on Agriculture Ecosystem  
2090 Greenhouse Gas Emissions and Productivity in Wheat-Maize Rotation System. 2019. (In  
2091 Chinese)

2092 791 Wang, P. Remediation of cu and cd-contaminated soil by joint application of straw and  
2093 engineered bacteria. 2011. (In Chinese)

2094 792 Wen, D. Effects of straw biochar application on tobacco soil carbon and nitrogen forms and  
2095 related enzyme activities. 2017. (In Chinese)

2096 793 Ma, Y. Effect of application of straw-derived biochar on denitrification and anammox in paddy  
2097 soil. 2020. (In Chinese)

2098 794 Guo, C. Effects of cotton straw incorporation on soil microbial biomass carbon, nitrogen,  
2099 phosphorus and Soil Dissolved Organic Carbon of continuous cropping cotton field. 2015. (In  
2100 Chinese)

2101 795 Li, C. Study on the effect of corn straw on mian physical and chemical characteristics of black  
2102 soil. 2012. (In Chinese)

2103 796 Ye, C. Effects of Straw Returning Methods and Quantities on Organic Carbon and Nitrogen  
2104 components in Brown Earth and the Growth of Maize. 2019. (In Chinese)

2105 797 Xu, Y. Changes of Contents and Chemical Composition of Soil Labile Organic Carbon Fractions  
2106 and its Correlation with Soil Enzyme Activities under Straw Incorporation Condition. 2018. (In  
2107 Chinese)

2108 798 Pei, P. Effects of Straw Incorporation Coupled Nitrogen levels on Biochemical Properties of  
2109 Paddy Soil and Growth Characteristics of Rice. 2014. (In Chinese)

2110 799 Su, Y. Effects of long-term straw return on n<sub>2</sub>o and no emissions from wheat-maize rotation  
2111 system in purplish soil. 2021. (In Chinese)

2112 800 Li, X. Effect of combination of rice husk biochar and organic fertilizers on soil organic carbon  
2113 fractions and soil microbial community of apple orchard. 2016. (In Chinese)

2114 801 Hu, X. Effects on soil fertility in the application of organic materials in paddy field. 2019. (In  
2115 Chinese)

2116 802 Huang, X. Mechanisms of the interaction between poorly crystalline iron oxides and soil  
2117 organic carbon in a rice-wheat cropping system. 2017. (In Chinese)

2118 803 Xia, Z. Nitrogen and carbon transformation in soil of maize/fabe-bean intercropping system.  
2119 2011. (In Chinese)

2120 804 Li, Y. Effects of plastic film mulching and fertilization on soil respiration and carbon stocks on  
2121 the Loess Plateau cropland. 2021. (In Chinese)

2122 805 Luo, P. Effect of long-term fertilization on microbial community in a brown soil under  
2123 crop-rotation system. 2014. (In Chinese)

2124 806 Dao, L. Emission characteristics of co<sub>2</sub> and ch<sub>4</sub> on dryland under different long-term  
2125 fertilizations. 2018. (In Chinese)

2126 807 Huang, C. Regulation of long-term fertilization on iron oxides and organic carbon preservation  
2127 in soils. 2015. (In Chinese)

2128 808 Guo, Y. Emission characteristics of co<sub>2</sub> and ch<sub>4</sub> on dryland lou soil under different long-term  
2129 fertilizations. 2017. (In Chinese)

2130 809 Hao, X. Effect of long-term fertilization on soil organic carbon, organic nitrogen and microbial  
2131 properties in subtropical paddy soils. 2008. (In Chinese)

2132 810 Li, D. Influence of long-term fertilization on AM fungi community in a brown soil. 2018. (In

2133 Chinese)

2134 811 Rong, J. Effects of long-term fertilization on soil carbon pool and distribution characteristics of  
2135 aggregates in oasis farmland. 2012. (In Chinese)

2136 812 Kong, F. Relationship between humus carbon and microbial community structure and function  
2137 in long-term fertilized red soil aggregates. 2020. (In Chinese)

2138 813 Zhang, J. Changes of winter wheat yield and soil fertility under long-term straw management  
2139 and nitrogen application. 2018. (In Chinese)

2140 814 Huang, W. Research on the difference of soil organic carbon, nitrogen fractions and yield in  
2141 double-cropped paddy in south china under long-term straw return. 2020. (In Chinese)

2142 815 Yao, F. Effect of long-term rotation fertilization on ammonia oxidation microorganisms  
2143 abundance in brown soil. 2016. (In Chinese)

2144 816 Li, X. Response mechanism of soil organic carbon to different agricultural tillage methods in the  
2145 north of yinshan. 2017. (In Chinese)

2146 817 Peng, Y. Response of Soil Respiration to Addition of Nitrogen and Phosphorus and Influencing  
2147 Factors of Dry Farmland in Longzhong. 2021. (In Chinese)

2148 818 Huang, T. Intercropping and fertilization of forage rape with sorghum in feed rapeseed effect of  
2149 yield quality and soil organic carbon composition. 2020. (In Chinese)

2150 819 Song, J. Response of soil organic carbon and crop yield to long-term fertilization and climate  
2151 change in winter-wheat and summer-maize rotation. 2021. (In Chinese)

2152 820 Luo, K. Black soil carbon nitrogen and its fraction in response to long-term fertilization. 2012.  
2153 (In Chinese)

2154 821 Luo, C. Effects of structural variation on wheat productivity and soil quality and its mechanism  
2155 under ridge-furrow mulching farming system in semiarid East African Plateau. 2020. (In  
2156 Chinese)

2157 822 Qi, R. Responses of Soil Organic Carbon Mineralization under Long-term Fertilization Regimes  
2158 to Temperature Changes and Cattle Manure Addition. 2016. (In Chinese)

2159 823 Chen, L. Study on effects of the typical rice-wheat herbicides influencing on CH<sub>4</sub> and N<sub>2</sub>O  
2160 emissions from croplands ecosystem. 2014. (In Chinese)

2161 824 Yu, Z. Seasonal variations of microbial community structures and functions in cultivated and  
2162 natural restored Mollisols. 2012. (In Chinese)

2163 825 Jiang, Y. Effects of Inhibitors and Controlled Release Fertilizers on N<sub>2</sub>O and NO Emissions  
2164 from Fluvo-aquic Soil in the Old Course of Yellow. 2020. (In Chinese)

2165 826 Kuang, E. Analysis of DOC component structure in straw deep-combed black soil profile based  
2166 on fluorescence spectrum. 2022. (In Chinese)

2167 827 Zhao, X. Response of dissolved organic matter chemical properties to long-term different  
2168 fertilization in latosol: insight from ultraviolet-visible spectroscopy. 2022. (In Chinese)

2169 828 Zhang, J. Effects of Organic Fertilizer Substituting Mineral Nitrogen Fertilizer on Soil Carbon  
2170 and Absorbed Nutrient in Spring Wheat. 2022. (In Chinese)

2171 829 Liu, Z. The effects of different straw-derived biochars and tillage measures on soil carbon. 2021.  
2172 (In Chinese)

2173 830 Lu, S. Effects of different tillage and fertilization measures on soil nutrients, organic carbon and  
2174 microbial community functional diversity in Weibei Highland. 2020. (In Chinese)

2175 831 Pan, X. Effects of different tillage managements on soil carbon and nitrogen cycling microbial  
2176 diversity under double-cropping rice field. 2020. (In Chinese)

- 2177 832 Li, S. Effects of different tillage patterns on greenhouse gas emission and nitrogen uptake of rice.  
2178 2016. (In Chinese)
- 2179 833 Wang, X. Effects of conservation tillage on the indicators and correlations of soil organic carbon.  
2180 2009. (In Chinese)
- 2181 834 Wang, C. Effects of conservation tillage measures on the contents and properties of organic  
2182 carbon and nitrogen in lou soil. 2010. (In Chinese)
- 2183 835 Guo, L. Effects of no-tillage and straw return on soil organic carbon pool and microbial  
2184 diversity in rice–wheat systems. 2018. (In Chinese)
- 2185 836 Li, D. The dynamic of methane emission and the community structure and population of  
2186 methanogens under no-tillage non-flooded with straw mulching paddy field of southeast china.  
2187 2010. (In Chinese)
- 2188 837 Zhang, R. Paddy soil respiration and organic carbon fractions under wide ridge cultivated with  
2189 no-tillage in central China. 2015. (In Chinese)
- 2190 838 Liu, X. Effects of Deep Loosening and Deep Straw Returning on Soil Organic Carbon and  
2191 Microbial Community Characteristics in Black Soil. 2019. (In Chinese)
- 2192 839 Yan, X. Effects of cotton stubble returning and plowing on soil physicochemical properties and  
2193 microbial community struction in cosstal saline soil. 2021. (In Chinese)
- 2194 840 Meng, Y. Effects of straw incorporation on soil carbon-nitrogen conversion and crop growth in a  
2195 rice-wheat rotation system. 2020. (In Chinese)
- 2196 841 Kou, Z. Effects of tillage and application of fertilizer on paddy soil carbon emission and carbon  
2197 balance. 2011. (In Chinese)
- 2198 842 Wang, J. Effect of Different Tillage Practices on Soil Organic Carbon Transformation and Water  
2199 Use in Dryland Winter Wheat. 2014. (In Chinese)
- 2200 843 Wu, Y. The effect of tillage systems on organic carbon fractions in a purple paddy soil. 2012. (In  
2201 Chinese)
- 2202 844 Wang, X. Effects of returning mode and straw-decomposing inoculant on decomposition  
2203 characteristics and soil nutrient content of maize straw. 2020. (In Chinese)
- 2204 845 Teclemariam, S. G. Effect of on-tillage on soil organic carbon and nitrogen and their pools in  
2205 rainfed agriculture of northern china. 2012. (In Chinese)
- 2206 846 Li, J. Long-term tillage effects on soil aggregate organic carbon and microbial community  
2207 diversity. 2014. (In Chinese)
- 2208 847 Hao, M. Changes of soil organic carbon components and relationships with soil microbial  
2209 diversity in wheat-maize crop system. 2018. (In Chinese)
- 2210 848 Wang, Y. Effects of Different Elevated CO<sub>2</sub> Concentrations on CH<sub>4</sub> Emission and its  
2211 Mechanism in Paddy Fields. 2021. (In Chinese)
- 2212 849 Yu, C. Soil microbial responses to global change in a semi-arid steppe in northern china. 2016.  
2213 (In Chinese)
- 2214 850 Zhou, G. Responses of soil respiration to simulated drought and nitrogen addition in a  
2215 subtropical evergreen broad-leaved forest. 2020. (In Chinese)
- 2216 851 Wu, Y. Effects of litter and nitrogen addition on carbon and nitrogen of soil fractions in  
2217 *Castanopsis faberi* Hance forest. 2019. (In Chinese)
- 2218 852 Chen, L. Response of soil nitrogen cycling to simulated rainfall reduction in Red Vertebra  
2219 plantation, South Subtropical region. 2019. (In Chinese)
- 2220 853 Zhang, J. Characteristics and influence factors of soil respiration in alpine marsh meadow under

- 2221 warming and nitrogen application. 2021. (In Chinese)
- 2222 854 Zhao, S. Influence of Arbuscular Mycorrhizal Fungi on Soil Aggregates and Carbon Storage  
2223 under Warming and Nitrogen Addition in Songnen Grassland. 2021. (In Chinese)
- 2224 855 Zhong, Z. Effects of experimental warming and precipitation manipulation on the key processes  
2225 of soil carbon cycle in abandoned farmland of the loess hilly region. 2021. (In Chinese)
- 2226 856 Zheng, Y. Effects of soil warming and precipitation exclusion on soil respiration of chinese fir  
2227 plantation and its mechanism in mid-subtropical china. 2017. (In Chinese)
- 2228 857 Bai, H. The effect of warming on the change of soil organic carbon and its components in  
2229 subtropical forests. 2020. (In Chinese)
- 2230 858 Li, Y. Effect of Warming on N<sub>2</sub>O Emission on Alpine Meadow and Cultivated Grassland in the  
2231 Qinghai Tibet Plateau. 2020. (In Chinese)
- 2232 859 Zhou, W. Effects of increasing atmospheric temperature and carbon dioxide concentration on  
2233 CH<sub>4</sub> and N<sub>2</sub>O emissions and microorganisms in paddy fields. 2017. (In Chinese)
- 2234 860 Li, D. Nitrogen application has effect on soil of *Schima superba* forest in Tiantong Influence of  
2235 carbon pool formation and decomposition. 2015. (In Chinese)
- 2236 861 Wang, Y. Effect of simulated warming and throughfall reduction on soil respiration and  
2237 microbial response in Warm-temperate oak (*Quercus aliena* var. *acuteserrata*) forest. 2015. (In  
2238 Chinese)
- 2239 862 Yang, C. Effects of simulated warming on soil inorganic nitrogen in a young and a mature  
2240 *Cunninghamia lanceolata* stand in humid. 2020. (In Chinese)
- 2241 863 Pan, X. Effects of simulated warming and nitrogen deposition on soil respiration and DOM in  
2242 soil solution. 2016. (In Chinese)
- 2243 864 Wang, X. Effects of simulated warming and precipitation increasing on soil carbon composition  
2244 and respiration of abandoned grassland in the loess hilly region. 2021. (In Chinese)
- 2245 865 Gou, X. Effect of simulated climate warming on soil carbon and nitrogen transformation in the  
2246 alpine forest of western sichuan. 2014. (In Chinese)
- 2247 866 Chao, A. Effects of simulated climate change on greenhouse gas fluxes in typical steppe  
2248 ecosystem. 2019. (In Chinese)
- 2249 867 Xiong, L. Changes molecular composition of rice root exudates and soil organic matter in a rice  
2250 paddy under simulated climate change. 2020. (In Chinese)
- 2251 868 Lei, Z. Effects of simulated nitrogen deposition and biochar addition on dissolved organic  
2252 carbon and nitrogen in Moso bamboo plantation. 2019. (In Chinese)
- 2253 869 Wang, C. Effects of simulated nitrogen deposition and acidification on soil properties in Yunwu  
2254 Mountain grassland. 2020. (In Chinese)
- 2255 870 Chu, X. Effects of Simulated Nitrogen Deposition on Soil Nitrogen Mineralization in *Quercus*  
2256 *Acutissima* Forest of Urban and Rural Areas. 2021. (In Chinese)
- 2257 871 Peng, Y. Effects of simulated nitrogen deposition on belowground carbon cycling processes and  
2258 soil biochemical characteristics in a secondary evergreen broad-leaved forest on Wawu  
2259 Mountain. 2016. (In Chinese)
- 2260 872 Zhang, J. Effect of simulated nitrogen deposition on soil carbon budget progress in a *larix*  
2261 *olgensis* plantation forest. 2016. (In Chinese)
- 2262 873 Qu, W. Effects of stimulated nitrogen deposition on soil carbon budget in the Yellow River Delta  
2263 Wetland. 2021. (In Chinese)
- 2264 874 Li, J. Effects of simulated nitrogen input on the key processes of carbon cycle in a salt marsh in

2265 the Yellow River Delta. 2021. (In Chinese)

2266 875 Wang, N. Effects of simulated acid rain on the roots and soil ecological processes of a  
2267 subtropical broadleaf *pyllostachys edulis* mixed stand. 2020. (In Chinese)

2268 876 An, W. Effects of simulated acid rain on nutrient dynamics of paddy field and greenhouse gases  
2269 emission in fuzhou plain. 2017. (In Chinese)

2270 877 Zhang, M. Effects of nitrogen and litter addition on soil organic carbon pool components in  
2271 Minjiang River estuary wetland. 2019. (In Chinese)

2272 878 Xu, W. Study on effects of nitrogen deposition, grazing and extreme precipitation on N<sub>2</sub>O  
2273 emissions in a *leymus chinensis* meadow. 2021. (In Chinese)

2274 879 Zhang, C. Effects of nitrogen deposition and acidity mitigation on plant fine root functional  
2275 traits and ecological process in red soil region. 2020. (In Chinese)

2276 880 Hao, Y. Effects of nitrogen deposition on soil organic carbon and microbial properties in  
2277 evergreen broad-leaved forests of subtropics. 2018. (In Chinese)

2278 881 Cui, J. Mechanism of nitrogen deposition on undergrowth and soil bacterial community  
2279 diversity in subtropical evergreen broad-leaved forest. 2017. (In Chinese)

2280 882 Li, J. Effects of nitrogen deposition on soil aggregate and organic carbon stability in subtropical  
2281 forest. 2016. (In Chinese)

2282 883 Zhao, S. Effects of nitrogen deposition on soil organic carbon in shrub grass tundra of Changbai  
2283 Mountain. 2021. (In Chinese)

2284 884 Wang, M. Effects of millipedes on microbial community structure and oxidase activity under the  
2285 nitrogen deposition. 2019. (In Chinese)

2286 885 Zhang, H. Effect of nitrogen addition on growth and soil nutrients of *cunninghamia lanceolata*  
2287 plantation. 2017. (In Chinese)

2288 886 Xu, K. Effects of simulated nitrogen deposition on soil active organic carbon in poplar  
2289 plantations in a coastal area, China. 2014. (In Chinese)

2290 887 Song, J. Effects of nitrogen and phosphorus additions on soil organic carbon fractions and  
2291 aggregate stability in a subtropical evergreen broad-leaved forest. 2020. (In Chinese)

2292 888 Li, L. Effect of N and P additions on C and N pools of rhizosphere and non-rhizosphere soils on a  
2293 subtropical evergreen broad-leaved forest. 2017. (In Chinese)

2294 889 Ling, X. Effects of nitrogen and phosphorus addition on the structure, carbon content and  
2295 stability of soil aggregates in Songnen grassland. 2020. (In Chinese)

2296 890 Li, C. Effects of wet deposition of nitrogen and phosphorus and litter addition on soil active  
2297 organic carbon pool and nitrogen and phosphorus in broad leaved *pinus koraiensis* forest. 2020.  
2298 (In Chinese)

2299 891 Wang, Y. Effect of adding a combination of nitrogen and phosphorus on fine root and soil  
2300 microbes of *machilus pauhoi*. 2018. (In Chinese)

2301 892 Zhang, Q. Short-term effects of soil warming and nitrogen addition on the C:N:P stoichiometry  
2302 and physiological ecology of *cunninghamia lanceolata* in subtropical regions. 2017. (In Chinese)

2303 893 Guo, J. Response of main mineral bioavailability to atmospheric CO<sub>2</sub> emission in paddy  
2304 ecosystem. 2011. (In Chinese)

2305 894 Liu, Y. Legacy effects of historical nitrogen and water addition on soil microbiological  
2306 characteristics in a typical steppe. 2021. (In Chinese)

2307 895 Li, Y. Effects of precipitation reduction and nitrogen addition on soil organic carbon content and  
2308 soil microbial community in subtropical mountain forests. 2020. (In Chinese)

2309 896 Tao, D. Effects of Precipitation Changes and Nutrient Addition on Ecosystem Carbon Exchange  
2310 of a Meadow Grassland in Hulunber. 2021. (In Chinese)

2311 897 Huang, Y. Effect of precipitation exclusion on castanopsis carlesil natural forest soil methane  
2312 uptake and methanotrophs community structure. 2014. (In Chinese)

2313 898 Li, H. Effects of simulated warming on active soil organic carbon and nitrogen of the alpine  
2314 timberline. 2018. (In Chinese)

2315 899 Wang, A. Effect of seasonal freeze-thaw on soil microbial and biochemical property in alpine  
2316 forest soil. 2012. (In Chinese)

2317 900 Guo, Q. Effect of nitrogen addition on growth and soil nutrient of cunninghamia lanceolate  
2318 plantation. 2016. (In Chinese)

2319 901 Huo, L. Impact of Buring Straw Layer Along With Plastic Mulching on Saline Soil Organic  
2320 Carbon and CO<sub>2</sub> Emission in Hetao Irrigation District. 2015. (In Chinese)

2321 902 Gao, G. Effects of Freezing on the Sediment Environment and Microorganism around Roots of  
2322 Typical Wetland Plants in Agricultural Drainage Ditch. 2021. (In Chinese)

2323 903 Huang, R. Effects of biological regulated measures on soil physicochemical properties and  
2324 runoff-sediment yield in three gorges reservoir region. 2013. (In Chinese)

2325 904 Yong, Y. Changes of Nutrients in Grassland of Typical Ecological Animal Husbandry  
2326 Cooperatives and Their Relationship with Sustainable Production in the Three Rivers Source  
2327 Region. 2016. (In Chinese)

2328 905 Zhou, F. Soil microbial community structure and function under plantations of different tree  
2329 species. 2017. (In Chinese)

2330 906 Zhang, P. Effects of different winter planting patterns on soil physical and chemical properties  
2331 and microbial diversity in double cropping rice fields. 2020. (In Chinese)

2332 907 Gu, H. Differences and Influencing Factors of PLFA Fingerprints under Different Land Use  
2333 Patterns in Red Soil. 2021. (In Chinese)

2334 908 Yang, Y. The structure of soil organic carbon and enzyme activity under different land types.  
2335 2017. (In Chinese)

2336 909 Jiang, J. Study on the response of autotrophic bacterial community and microbial carbon  
2337 sequestration to soil erosion under different soil types. 2019. (In Chinese)

2338 910 Di, J. Effects of different intercropping models of torreya grandis on soil physicochemical  
2339 properties and bacterial diversity. 2020. (In Chinese)

2340 911 Zhang, B. Study on Soil Nitrification, Denitrification and Functional Microorganisms of  
2341 Cunninghamia lanceolata Forest at Different Ages. 2020. (In Chinese)

2342 912 Zhu, X. Short-term effects of different regenerations after clearfelling on soil greenhouse gases  
2343 in Chinese fir plantation. 2016. (In Chinese)

2344 913 Li, Y. Dynamic study of soil organic carbon and soil respiration in different regeneration  
2345 patterns of Chinese fir plantation. 2010. (In Chinese)

2346 914 Yang, J. Studies on soil nitrogen transformations and the functional microorganisms in natural  
2347 secondary forests with different ages. 2020. (In Chinese)

2348 915 Huang, L. The influence of different vegetation restoration patterns on physical property and  
2349 soil labile carbon in degraded purple soil. 2015. (In Chinese)

2350 916 Wang, N. The research of change rule and characteristics of soil microbial metabolism and the  
2351 important indicators of organic carbon at different altitude. 2015. (In Chinese)

2352 917 Ding, X. Effect of different mixed modes on soil organic carbon and soil respiration in

2353 phyllostachys heterocycla. 2009. (In Chinese)

2354 918 Pu, Q. Study on soil organic carbon, nitrogen and enzyme activity characteristics with different  
2355 ecological restoration patterns in desert land of northwestern Sichuan, China. 2017. (In Chinese)

2356 919 Zhou, H. Variation Characteristics of Organic Carbon and Its Fractions in Soil of Alfalfa  
2357 Grassland with Different Growing Years. 2016. (In Chinese)

2358 920 Zhu, H. Effects of different carbon input manipulations on soil carbon, nitrogen and biological  
2359 characteristics of Schrenk's spruce (*Picea schrenkiana*) forest. 2021. (In Chinese)

2360 921 Li, X. Variation characteristics of soil carbon and nitrogen components in Tianshui Huanu apple  
2361 orchard with different planting years. 2021. (In Chinese)

2362 922 Xu, Q. Study on variation characteristics and influencing factors of soil aggregates in plastic  
2363 shed system during different planting years. 2020. (In Chinese)

2364 923 Zhan, M. Study on mechanisms of carbon sequestration, carbon emissions and soil organic  
2365 carbon dynamics in different farming paddy fields. 2009. (In Chinese)

2366 924 Wang, W. A preliminary study on soil carbon pool characteristics of poplar plantation under  
2367 different management modes. 2010. (In Chinese)

2368 925 Li, Z. Status Analysis of Soil Iron Oxide and Organic Carbon Forms in China's Different  
2369 Fertility Paddy Soils. 2018. (In Chinese)

2370 926 Yuan, Z. Response of soil organic matter fractions with different thinning intensities in  
2371 subalpine spruce forest western Sichuan. 2011. (In Chinese)

2372 927 Wang, N. Characteristics of carbon pools, nitrogen pools, phosphorus, potassium and nitrogen  
2373 balance, phosphorus balance as well as potassium balance in soil profile in typical spring maize  
2374 planted regions in northeast China. 2016. (In Chinese)

2375 928 Liu, T. Effect of forest conversion on quantities and spectroscopic characteristics of soil  
2376 dissolved organic matter in subtropical China. 2015. (In Chinese)

2377 929 Zheng, X. Effects of afforestation on soil organic carbon and nutrient content in different trees  
2378 of mid-subtropical China. 2018. (In Chinese)

2379 930 Bao, Y. Effects of vegetation types on soil DOM characteristics and microbes in the  
2380 mid-subtropical forests. 2018. (In Chinese)

2381 931 Li, J. Response of soil labile organic carbon fractions and carbon mineralization to land-use  
2382 changes in min-subtropical hilly region of China. 2014. (In Chinese)

2383 932 Zhao, P. Changes of soil organic carbon and microbial properties in *Pinus taiwanensis* forest at  
2384 different altitudes in Daiyun Mountain of subtropical. 2019. (In Chinese)

2385 933 Chen, X. Effect of land use and landscape position on soil labile organic carbon in the hilly  
2386 red-soil area of the mid-subtropical climatic zone. 2012. (In Chinese)

2387 934 Lian, X. Study on emission fluxes of CO<sub>2</sub> and CH<sub>4</sub> and their vertical distribution  
2388 characterizations of soil from wetlands in southeast China. 2014. (In Chinese)

2389 935 Wang, Q. Soil microbial respiration rate and its influencing factors along a north-south forest  
2390 transect in eastern China. 2016. (In Chinese)

2391 936 Sun, S. Responses of soil carbon and nitrogen cycles to Changes in Global Environmental  
2392 factors —Effects of land use types, N deposition and climate warming on soil C and N cycles.  
2393 2014. (In Chinese)

2394 937 Deng, W. Nitrous Oxide Emissions from a Hilly Tea Field in Subtropical China. 2018. (In  
2395 Chinese)

2396 938 Zeng, X. Characteristics of soil phosphorus under typical vegetation types in subtropical forests

2397 and the affecting factors. 2019. (In Chinese)

2398 939 Wang, M. Characteristics of dissolved organic carbon in a subtropical forest landscape and its  
2399 sequestration mechanisms. 2019. (In Chinese)

2400 940 Yuan, Z. Characteristics of Carbon Pool and Nutrients under two typical forests in Nanjing Zijin  
2401 Mountain. 2017. (In Chinese)

2402 941 Fei, F. Responses of soil microbial biomass and enzyme activities to forest gap scale. 2015. (In  
2403 Chinese)

2404 942 Mei, J. The characteristic of soil active organic carbon in different forest types in Saihanba.  
2405 2020. (In Chinese)

2406 943 Ding, L. Study on carbon and nitrogen forms and soil enzyme activities of rhizosphere soil of  
2407 main tree species in northern Da Hinggan Ling mountains. 2019. (In Chinese)

2408 944 Tian, S. Study on characteristics of soil labile organic carbon in main forest types in the north of  
2409 Da Hinggan Ling mountains. 2016. (In Chinese)

2410 945 Li, S. Characteristics of soil carbon change during forest succession in Da Hinggan mountains.  
2411 2019. (In Chinese)

2412 946 Sun, L. The Dynamics of Soil Organic Carbon Fractions in Different Vegetation Types of  
2413 Tianshan Forest. 2018. (In Chinese)

2414 947 Zhou, H. Study on Runoff and Sediment Yield Process of the Cross Ridge and Longitudinal  
2415 Ridge Slope under Natural Rainfall. 2018. (In Chinese)

2416 948 Zhang, Y. Abundance and diversity of soil nematode community in natural at different altitudes  
2417 in cold-temperate climate zone. 2021. (In Chinese)

2418 949 Wu, R. Research on soil microbial properties in *Larix principis-rupprechtii* plantation at Taiyue,  
2419 Shanxi. 2020. (In Chinese)

2420 950 Ke, Y. The characteristics of soil CO<sub>2</sub>, N<sub>2</sub>O emissions in the hilly area of central Sichuan basin  
2421 typical farmland and forest and validation of DNDC model for the measurements. 2015. (In  
2422 Chinese)

2423 951 Xu, Y. Effects of different transformation measures on soil organic carbon in the *Pinus*  
2424 *massoniana* low-benefit forest in southern Sichuan. 2016. (In Chinese)

2425 952 Hao, K. Seasonal dynamic of soil labile organic carbon in spruce plantation different structural  
2426 adjustment in subalpine of western Sichuan. 2011. (In Chinese)

2427 953 Kang, C. Seasonal dynamics of soil labile Organic Carbon in spruce plantation different  
2428 structural adjustment in subalpine of western Sichuan. 2019. (In Chinese)

2429 954 Huang, H. Study on soil dissolved organic matter content under different land use types of  
2430 Longgu district in Chengdu. 2013. (In Chinese)

2431 955 Gong, C. Effects of altered carbon input on carbon emissions of the marshy wetlands and the  
2432 microbiological mechanisms. 2018. (In Chinese)

2433 956 Xin, F. The seasonal dynamics of soil respiration and microbial community with different  
2434 plantations regeneration way of *Cunninghamia lanceolata*. 2012. (In Chinese)

2435 957 Lin, X. Effects of tree species composition on soil carbon composition in poplar plantation.  
2436 2021. (In Chinese)

2437 958 Zhang, H. Annual variations of the active and recalcitrant organic carbons and the microbial  
2438 influences in saline-alkali farmland soil. 2017. (In Chinese)

2439 959 Liu, X. Farmland carbon pool composition and emissions characteristics of various land use  
2440 types in Fuzhou. 2020. (In Chinese)

2441 960 Du, C. Seasonal dynamics of soil microbial communities under different forest types in the  
2442 Xinjiangshan Forest Region of Qinling Mountains. 2018. (In Chinese)

2443 961 Xu, Y. Mechanisms of Greenhouse Gas Emissions and Soil Organic Carbon Dynamics from  
2444 Rice-rapeseed Rotation in Different Water-saving Irrigation Paddy Fields. 2016. (In Chinese)

2445 962 Huang, T. Effects of different soil and water loss control measures on surface runoff and soil  
2446 nutrients in camellia forest in purple soil region. 2018. (In Chinese)

2447 963 Du, L. CO<sub>2</sub> emission from red soil and its influence factors in mid-subtropical China. 2006. (In  
2448 Chinese)

2449 964 Li, S. Study on Resource Utilization Efficiency and Soil Environmental Effects of  
2450 Multi-cropping Planting System in Red Upland Soil. 2021. (In Chinese)

2451 965 Yang, F. Non-target effects of naphthalene on soil respiration and biochemical characteristics in  
2452 the subalpine forest of western Sichuan, China. 2018. (In Chinese)

2453 966 Li, X. Effects of Close-to-nature Forest Reconstruction on Distribution Patterns of Carbon  
2454 Storage in Young and Middle Age Forests in Ningbo Area. 2019. (In Chinese)

2455 967 Feng, X. Effects of under-forest economic model of *Pinus massoniana* on soil active carbon and  
2456 soil respiration in Changting. 2017. (In Chinese)

2457 968 Ma, T. Effect of thinning on soil nitrous oxide fluxes in *Pinus massoniana* Plantation. 2016. (In  
2458 Chinese)

2459 969 Zhou, Q. Seasonal dynamics characteristics of soil and litter nutrients in *Phoebe bournei*,  
2460 *Cunninghamia lanceolata* and its mixed plantation. 2020. (In Chinese)

2461 970 Huang, Q. Contribution and influencing factors of soil organic matter derived from  
2462 microorganism during the restoration process of *Pinus massoniana* forest. 2020. (In Chinese)

2463 971 Liu, J. Effects of simulated climate warming on soil carbon and nitrogen transformation in the  
2464 alpine forest of western Sichuan. 2012. (In Chinese)

2465 972 Wei, Y. Effects of Rice Cultivation on Peatland Soil Enzyme Activities. 2019. (In Chinese)

2466 973 Huo, L. The vertical distribution and stability of SOC in marsh before and after reclamation.  
2467 2013. (In Chinese)

2468 974 Zhang, W. Dynamic and factors of microbial biomass carbon and dissolved organic carbon in  
2469 Peatland. 2015. (In Chinese)

2470 975 Xiang W. The effect of biochars application on short-range ordered minerals in paddy soils. 2017.  
2471 (In Chinese)
